# Supplementary material for: (S)-N-Benzyl-1-phenyl-3,4-dihydroisoqunoline-2(1H)-carboxamide Derivatives, Multi-Target Inhibitors of Monoamine Oxidase and Cholinesterase: Design, Synthesis, and Biological Activity
Source: MDPI journal article supplement (doi:10.3390/molecules28041654), 2023-02-09
Supplement: s1 [file s1]

10072021  
G-1 cdc13 2021-10-7

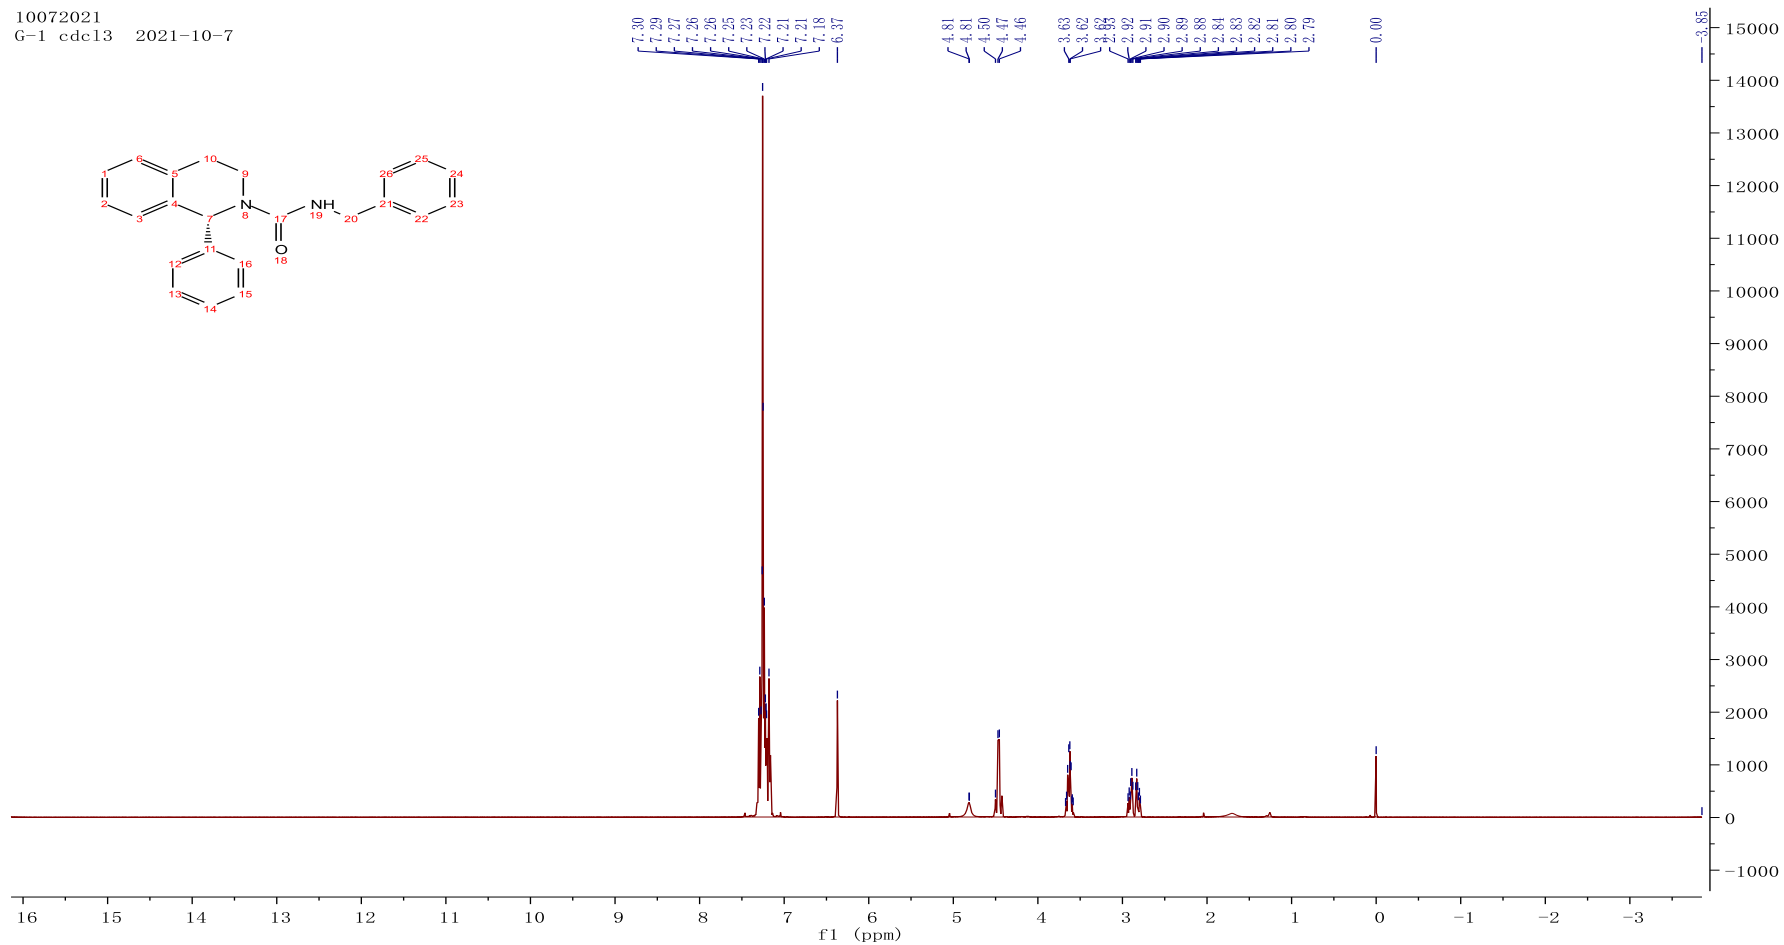

$^1\text{H}$ -NMR Spectral of **2a**

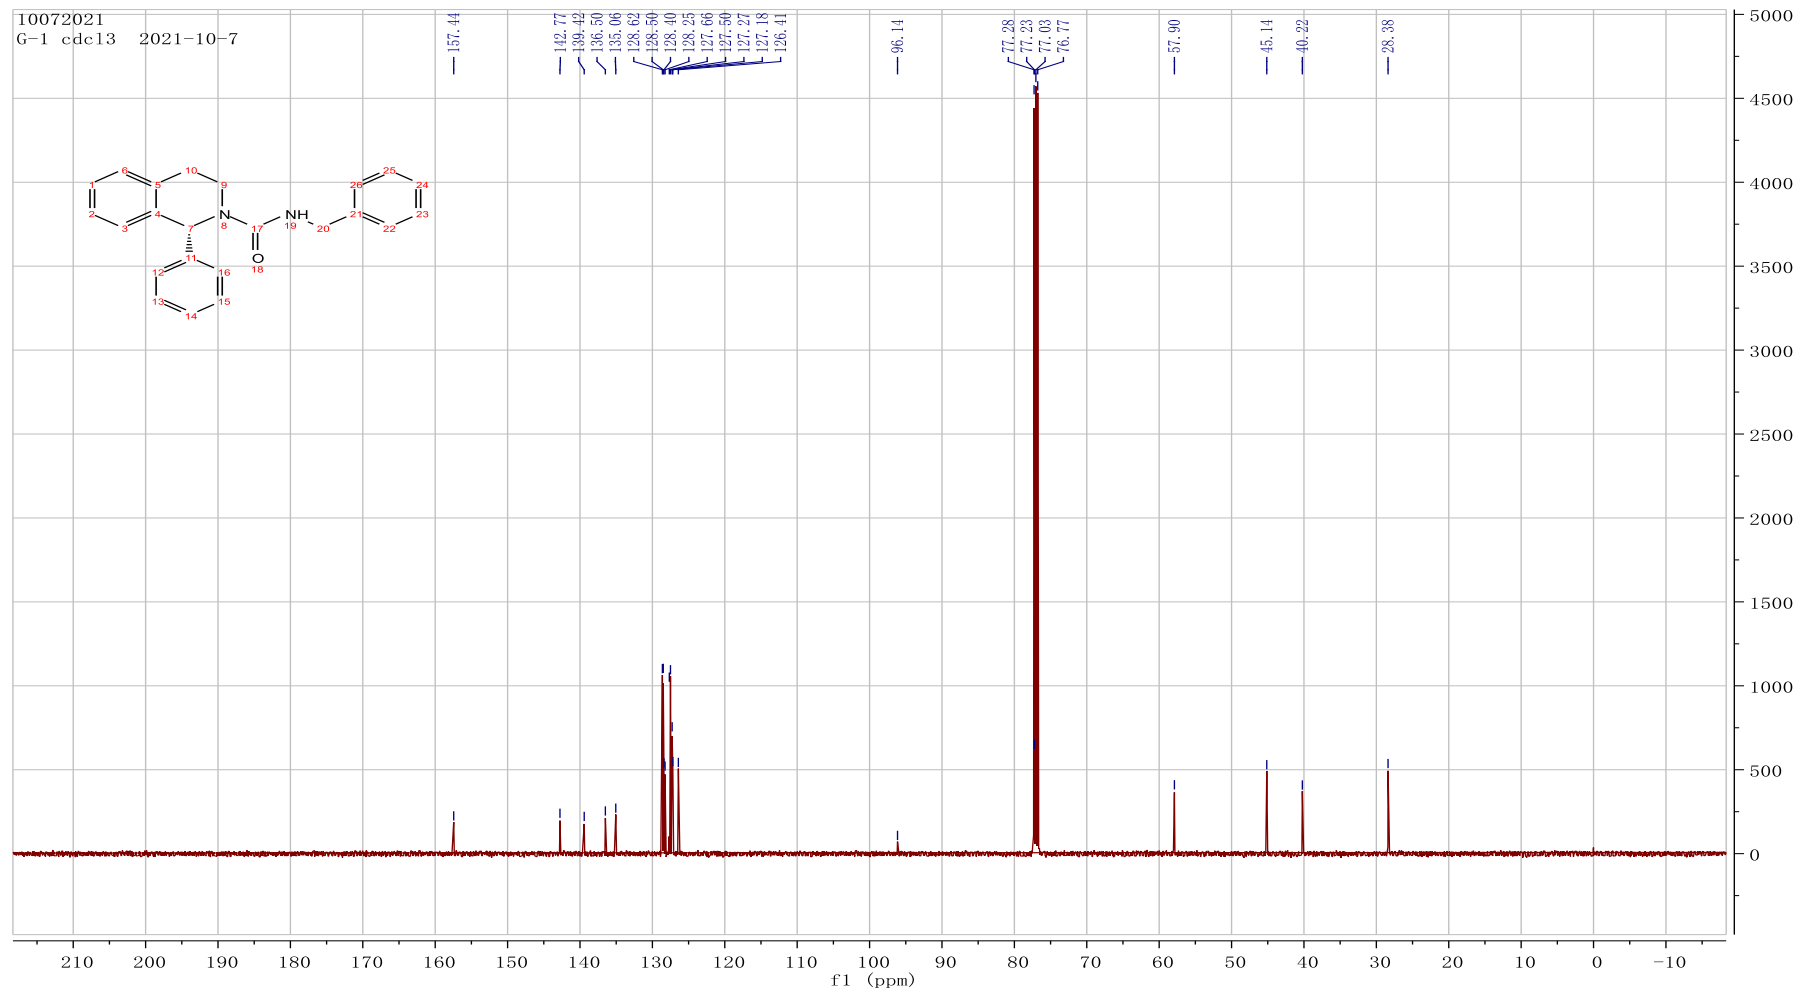

<sup>13</sup>C-NMR Spectral of **2a**

|           |           |  |
|-----------|-----------|--|
| 07122021  |           |  |
| G-1 cdc13 | 2021-7-12 |  |

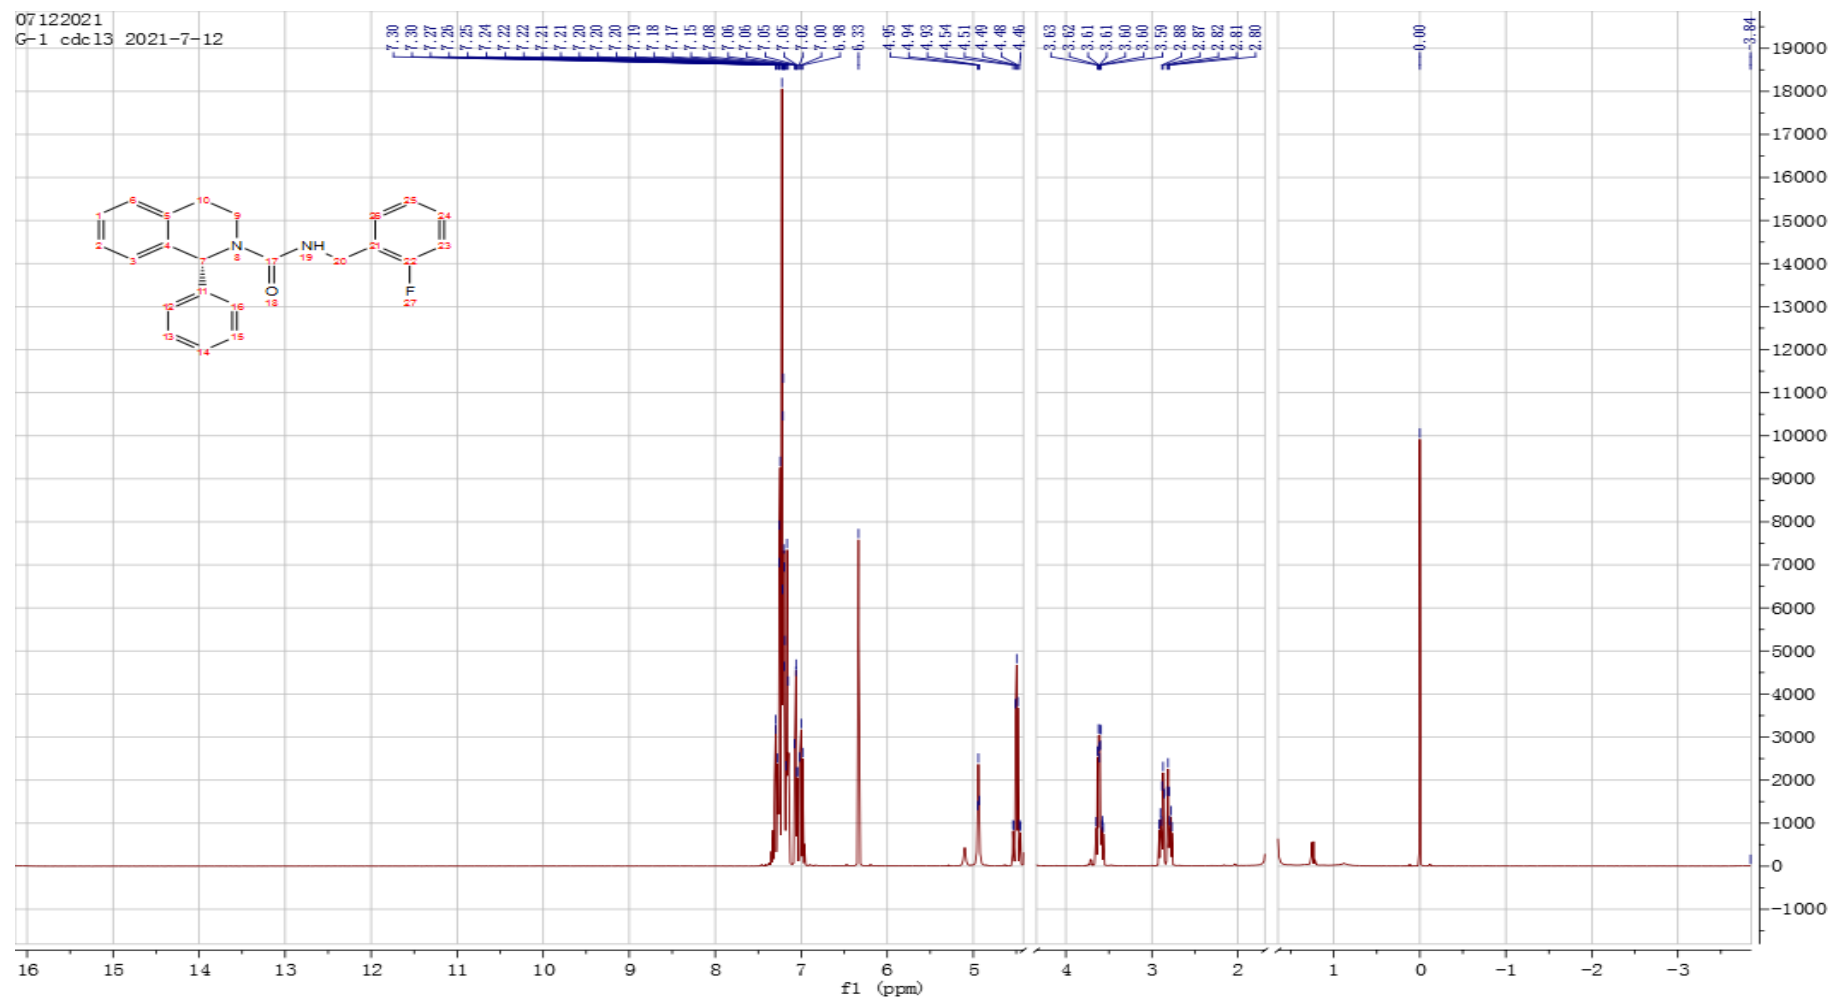

### <sup>1</sup>H-NMR Spectral of **2b**

07122021  
G-1 cdcl3 2021-7-12

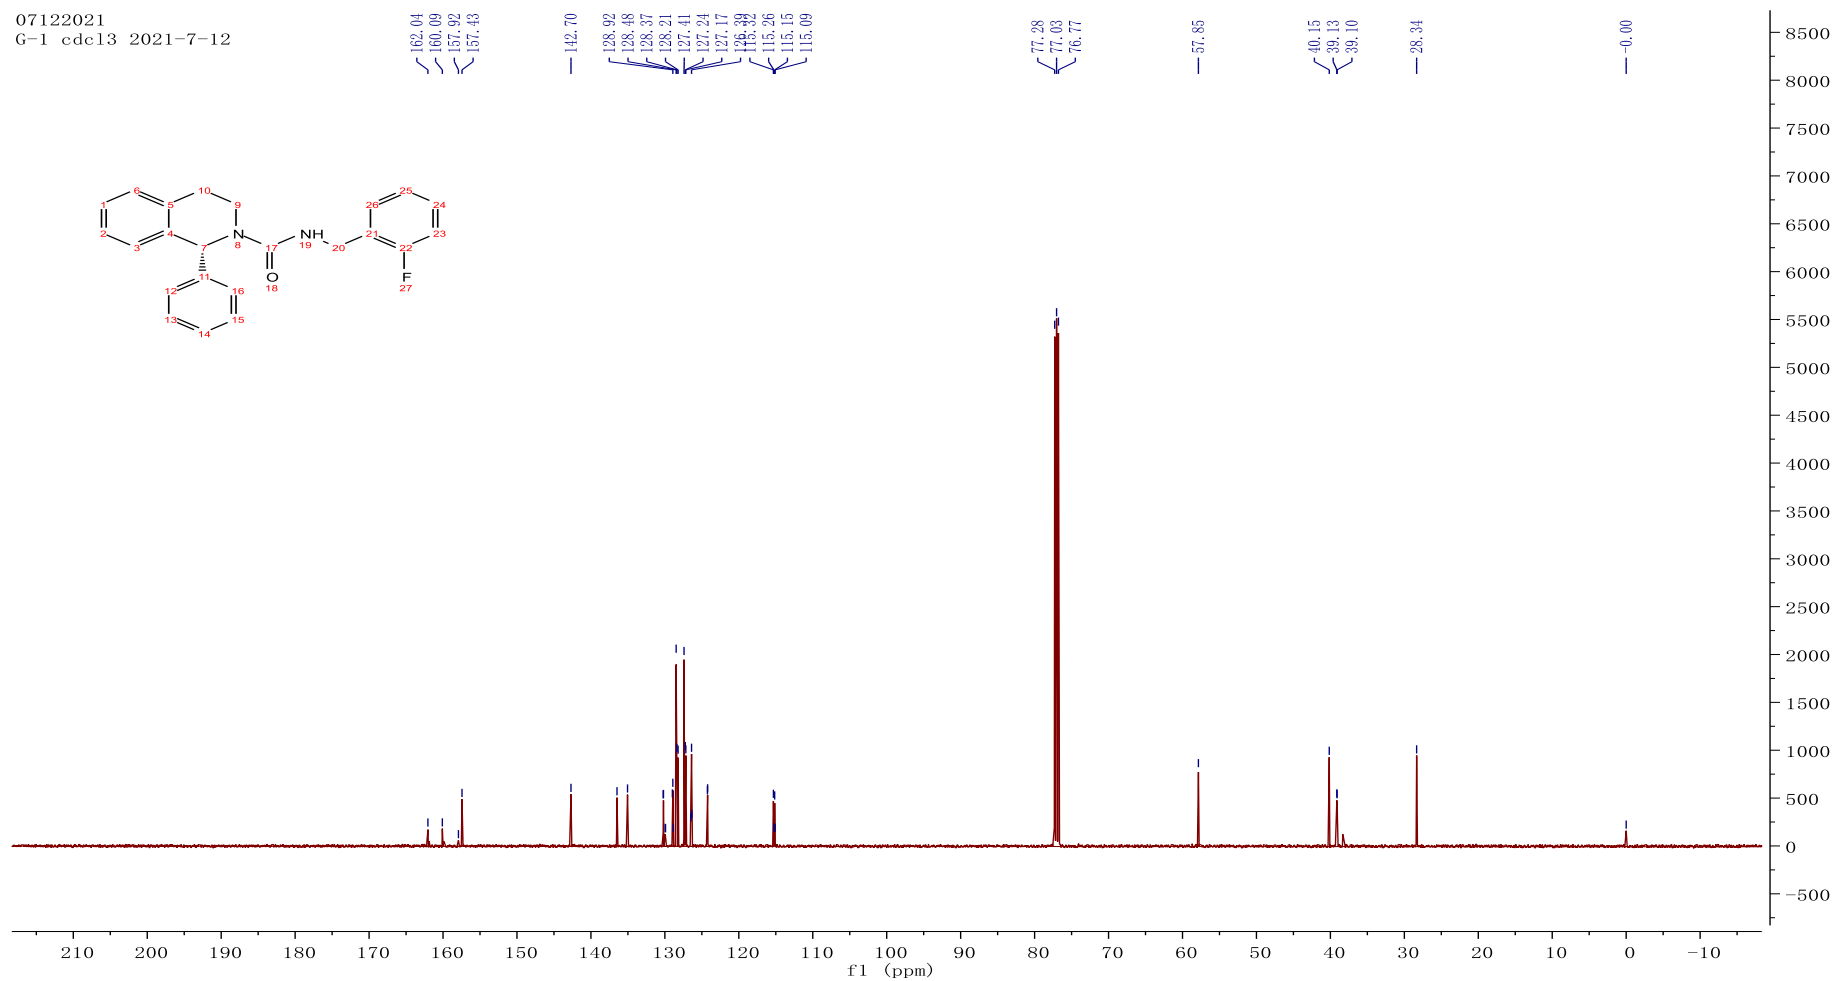

<sup>13</sup>C-NMR Spectral of **2b**

07122021  
G-2 cdc13 2021-7-12

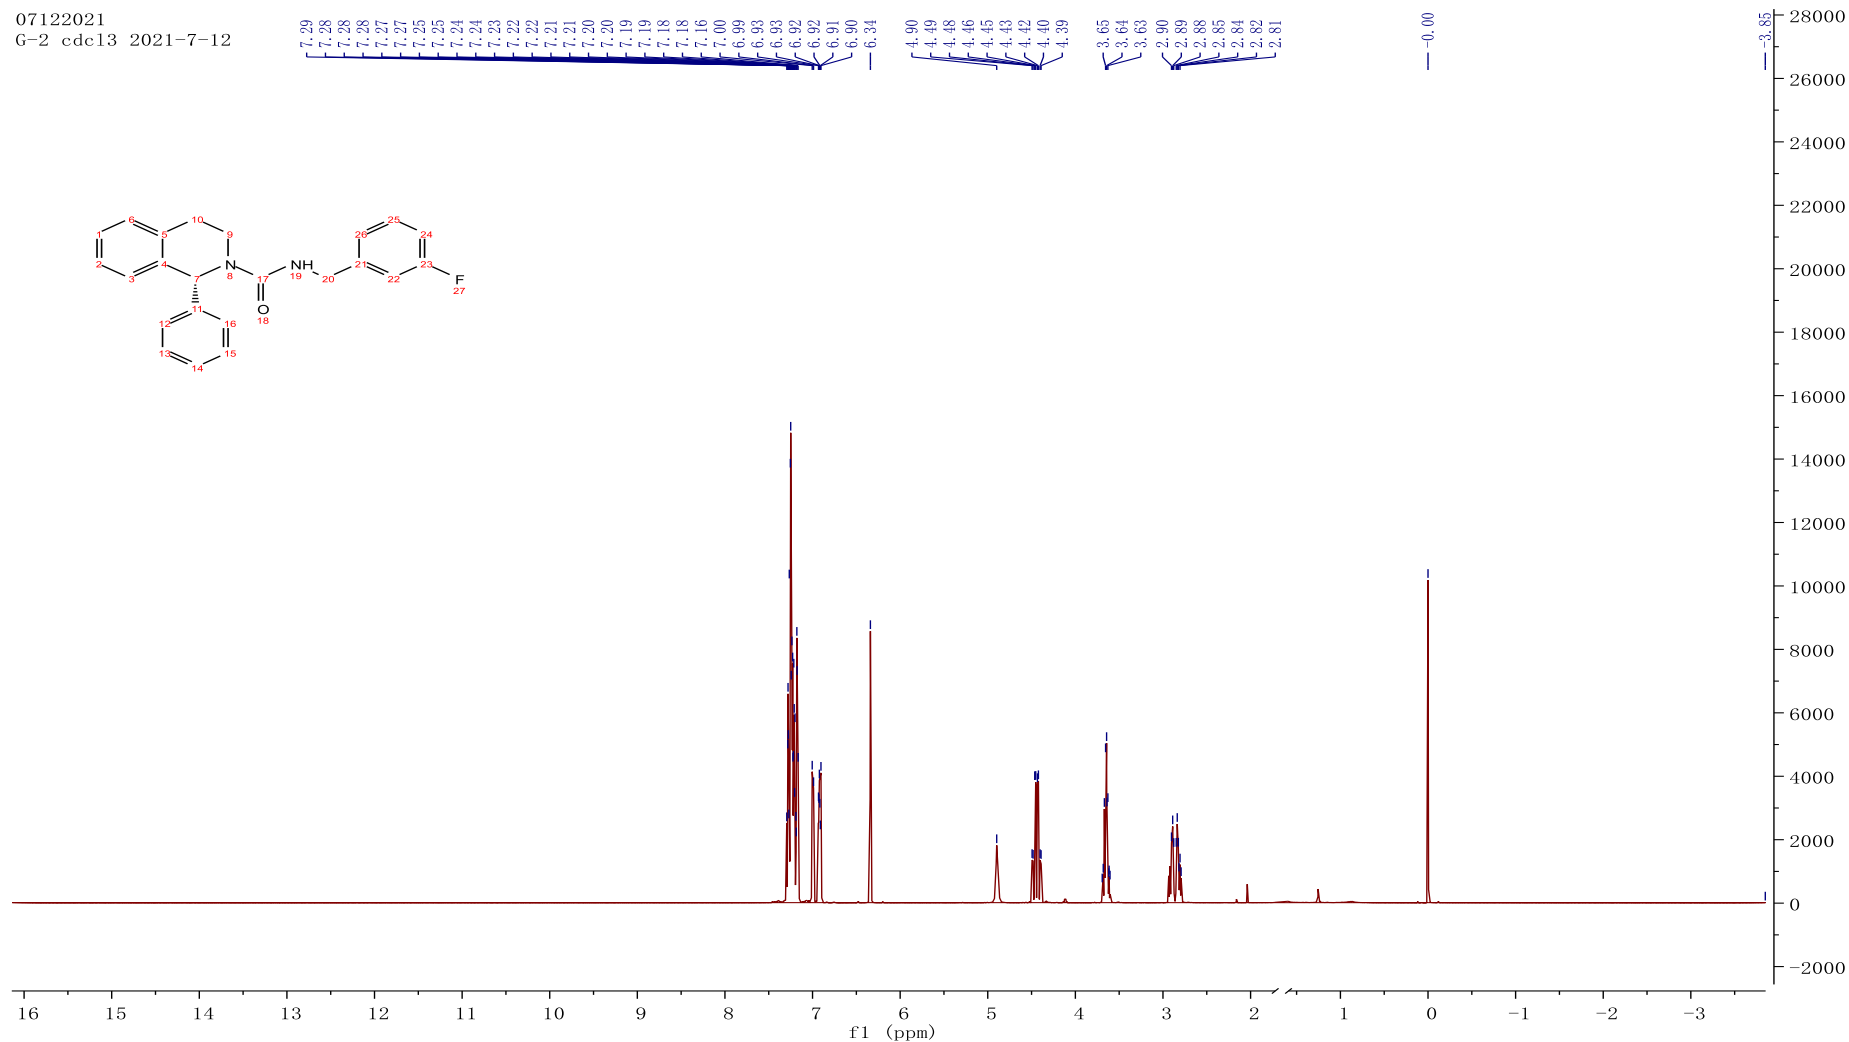

$^1\text{H}$ -NMR Spectral of **2c**

07122021  
G-2 cdc13 2021-7-12

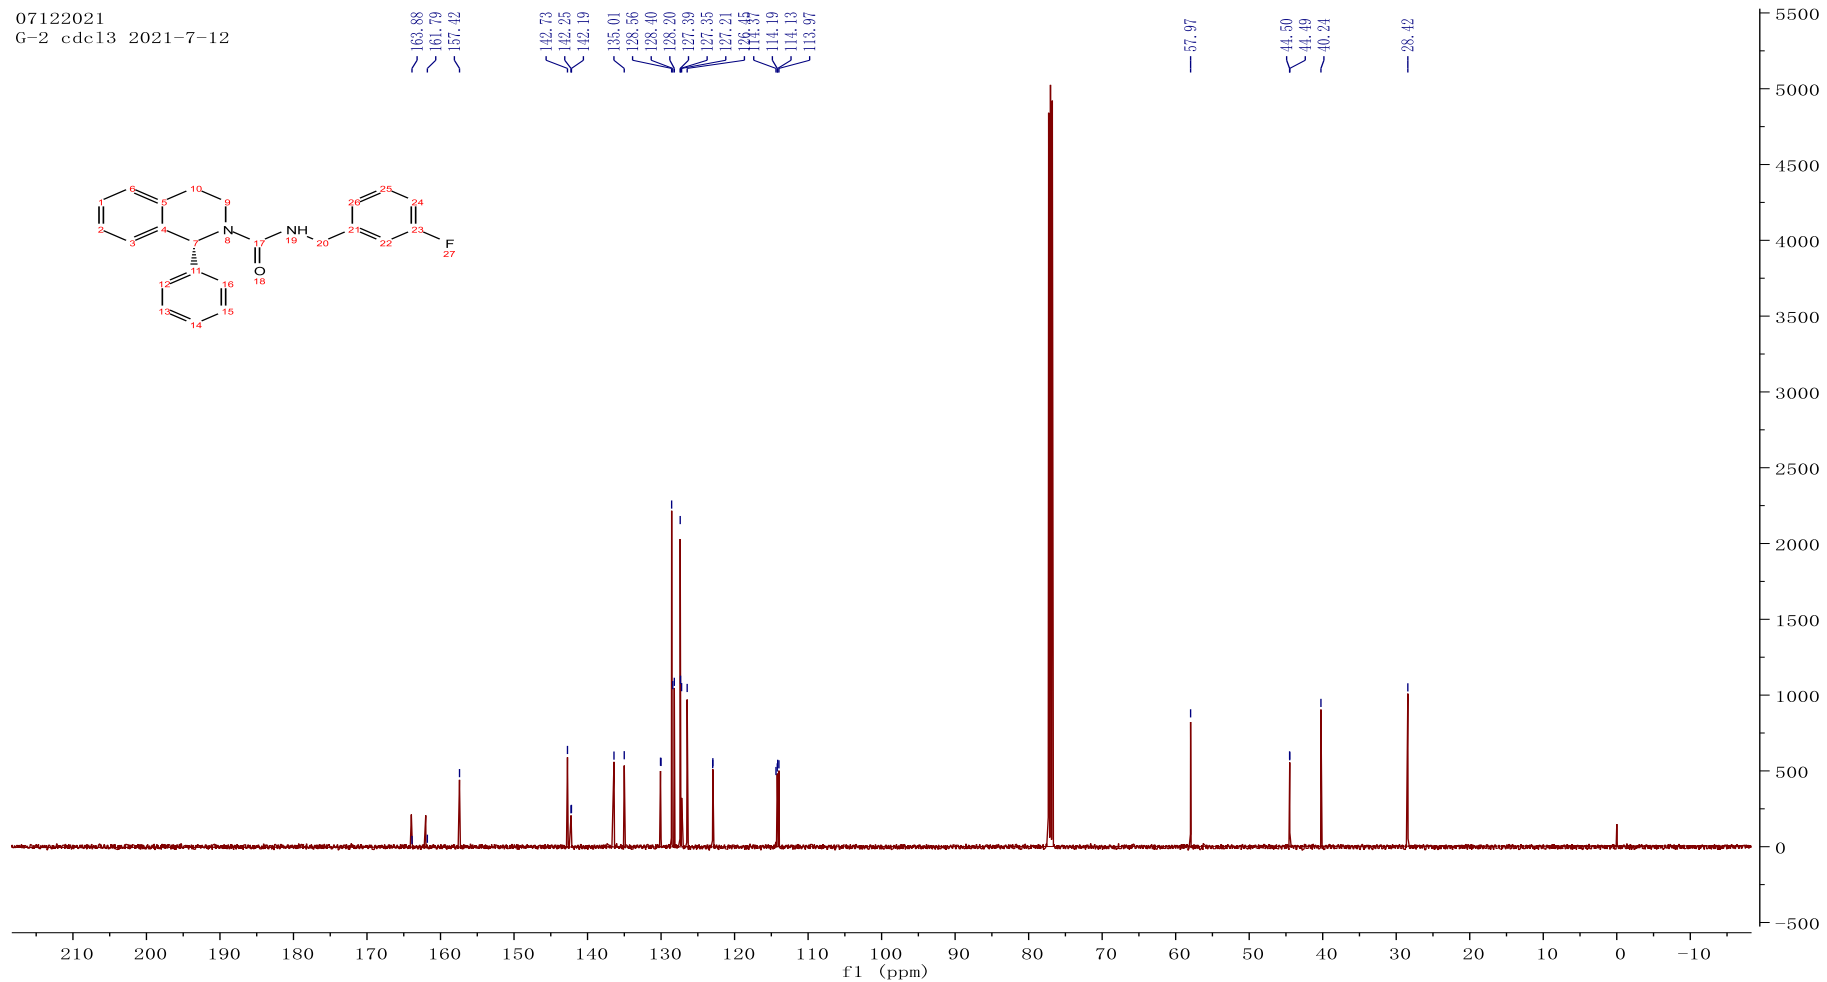

<sup>13</sup>C-NMR Spectral of **2c**

07122021  
G-3 cdc13 2021-7-12

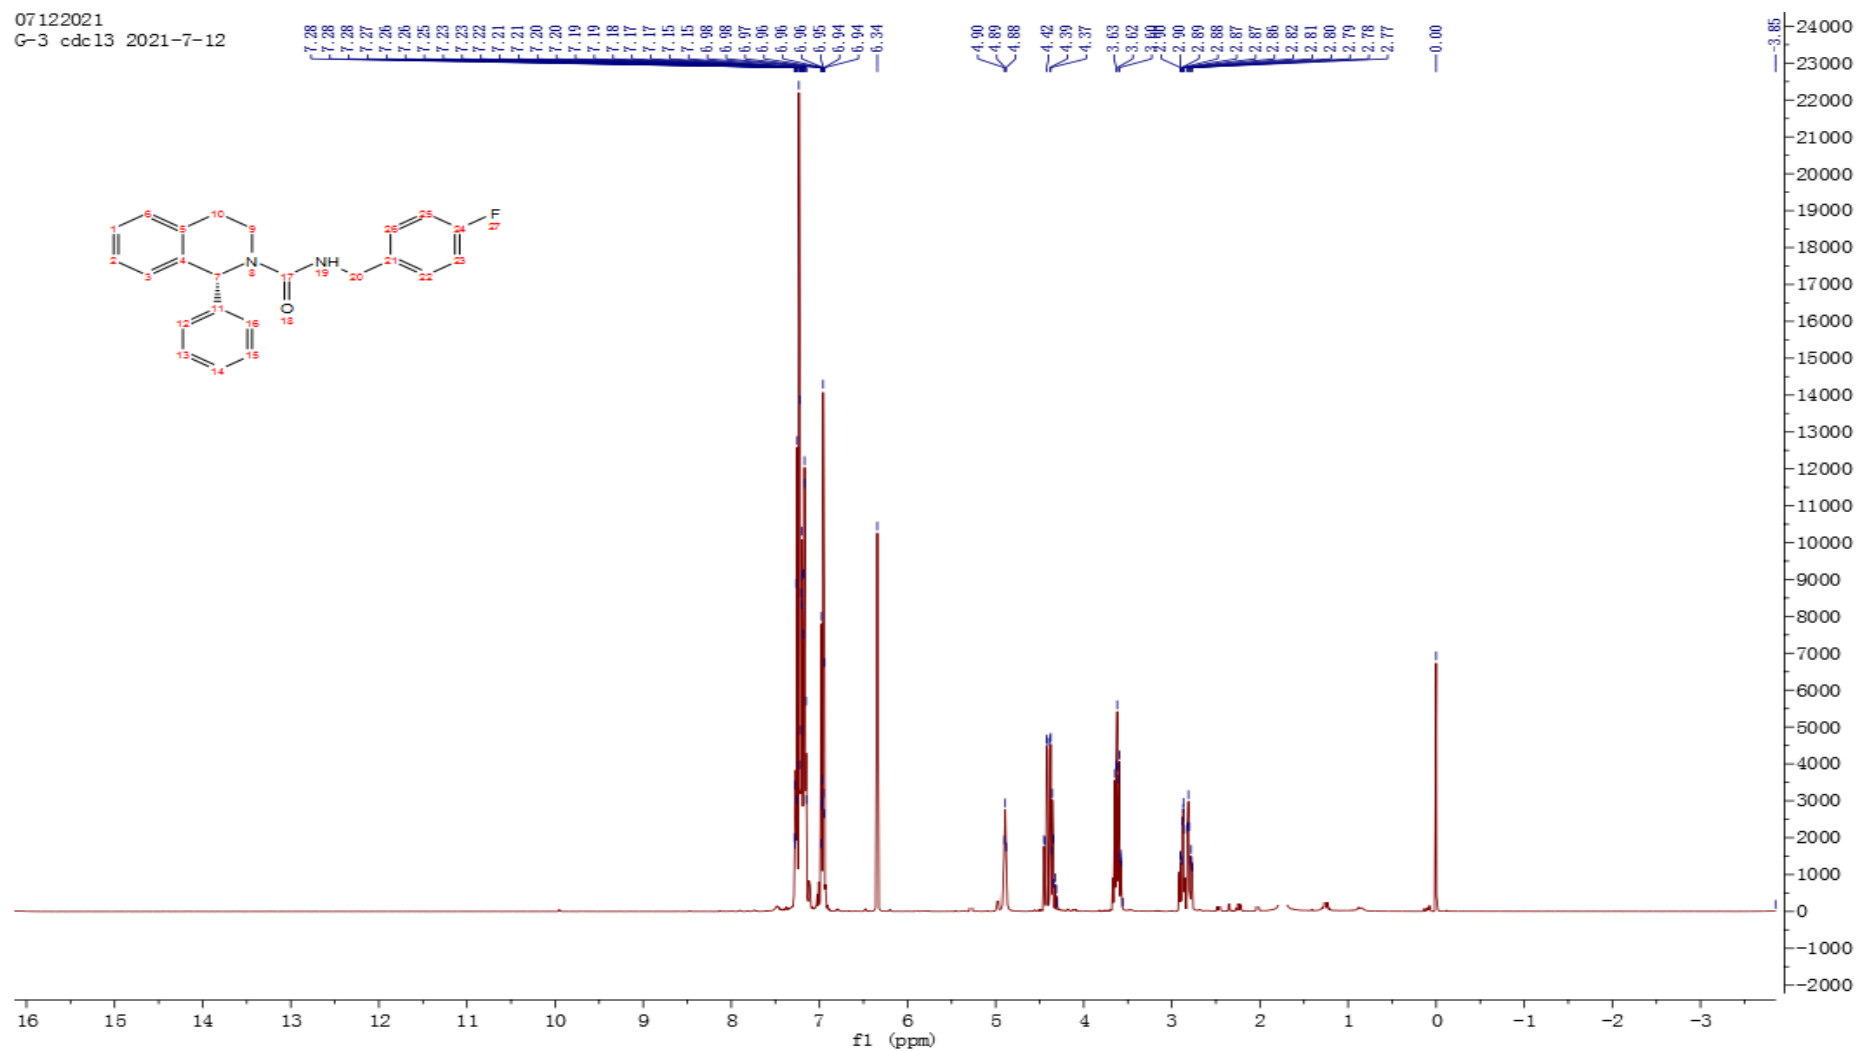

<sup>1</sup>H-NMR Spectral of **2d**

07122021  
G-3 cdcl3 2021-7-12

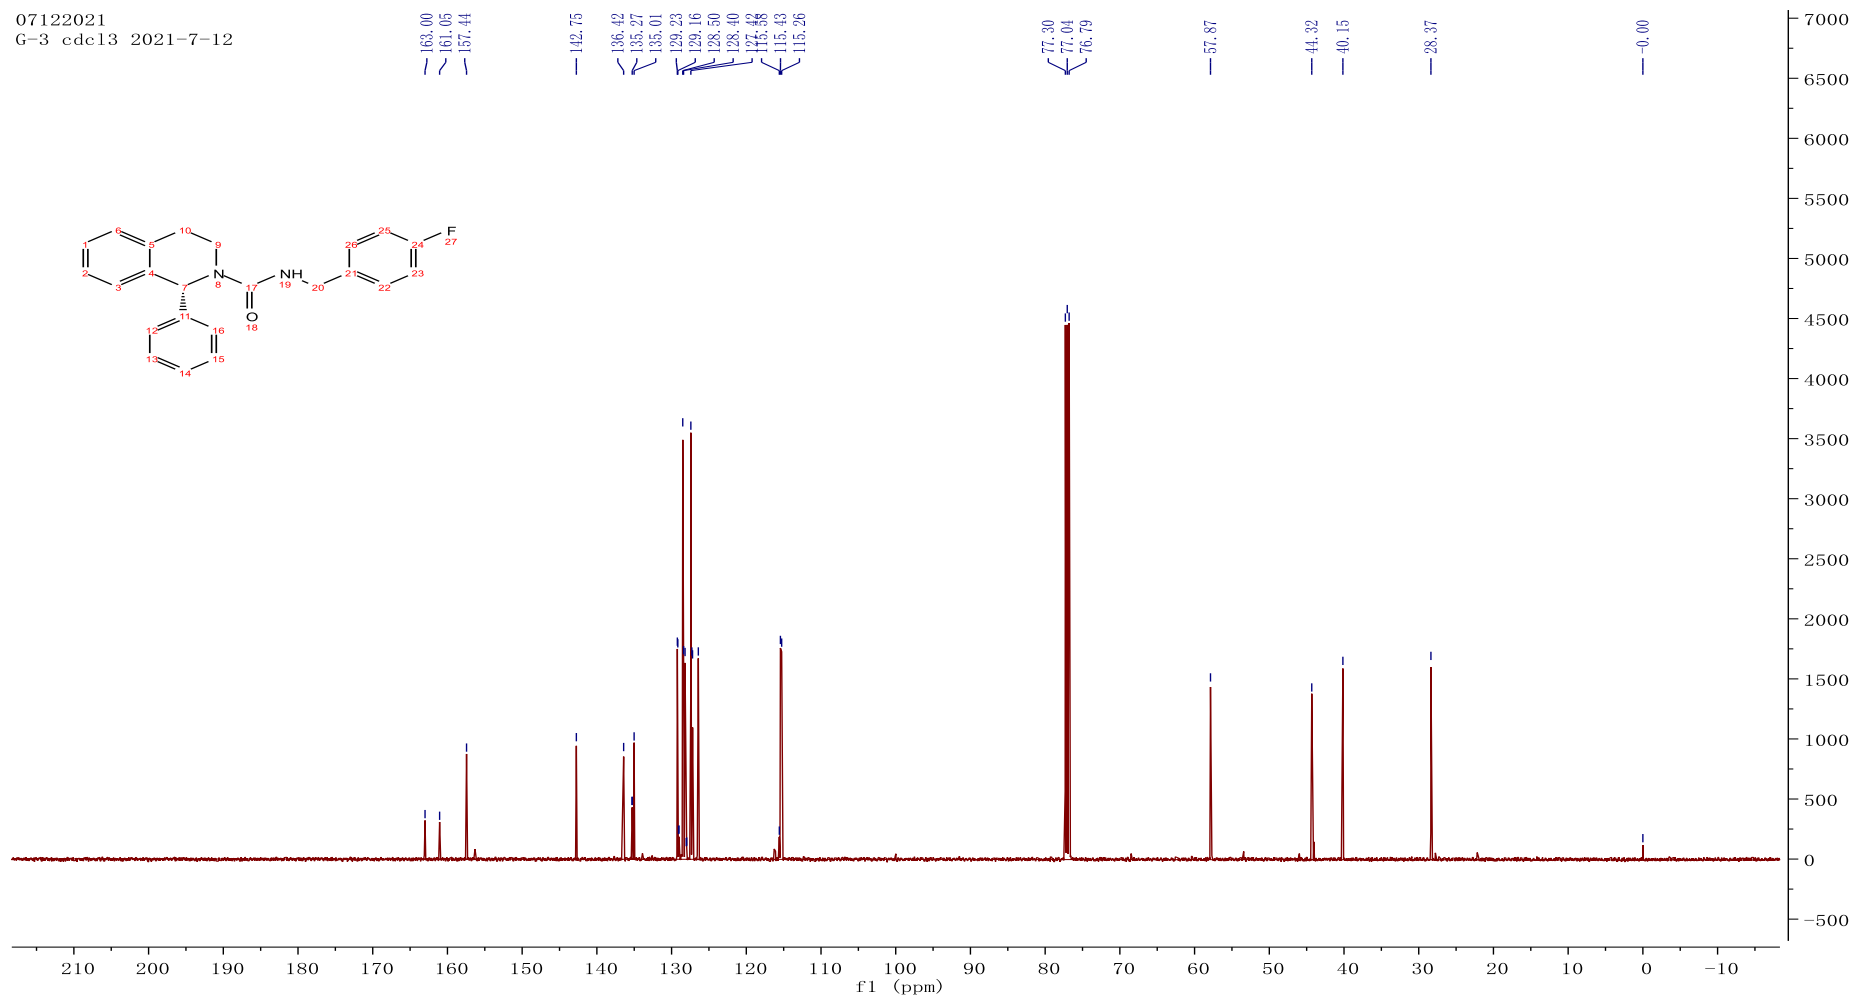



10072021  
G-2 cdc13 2021-10-7

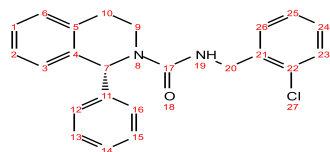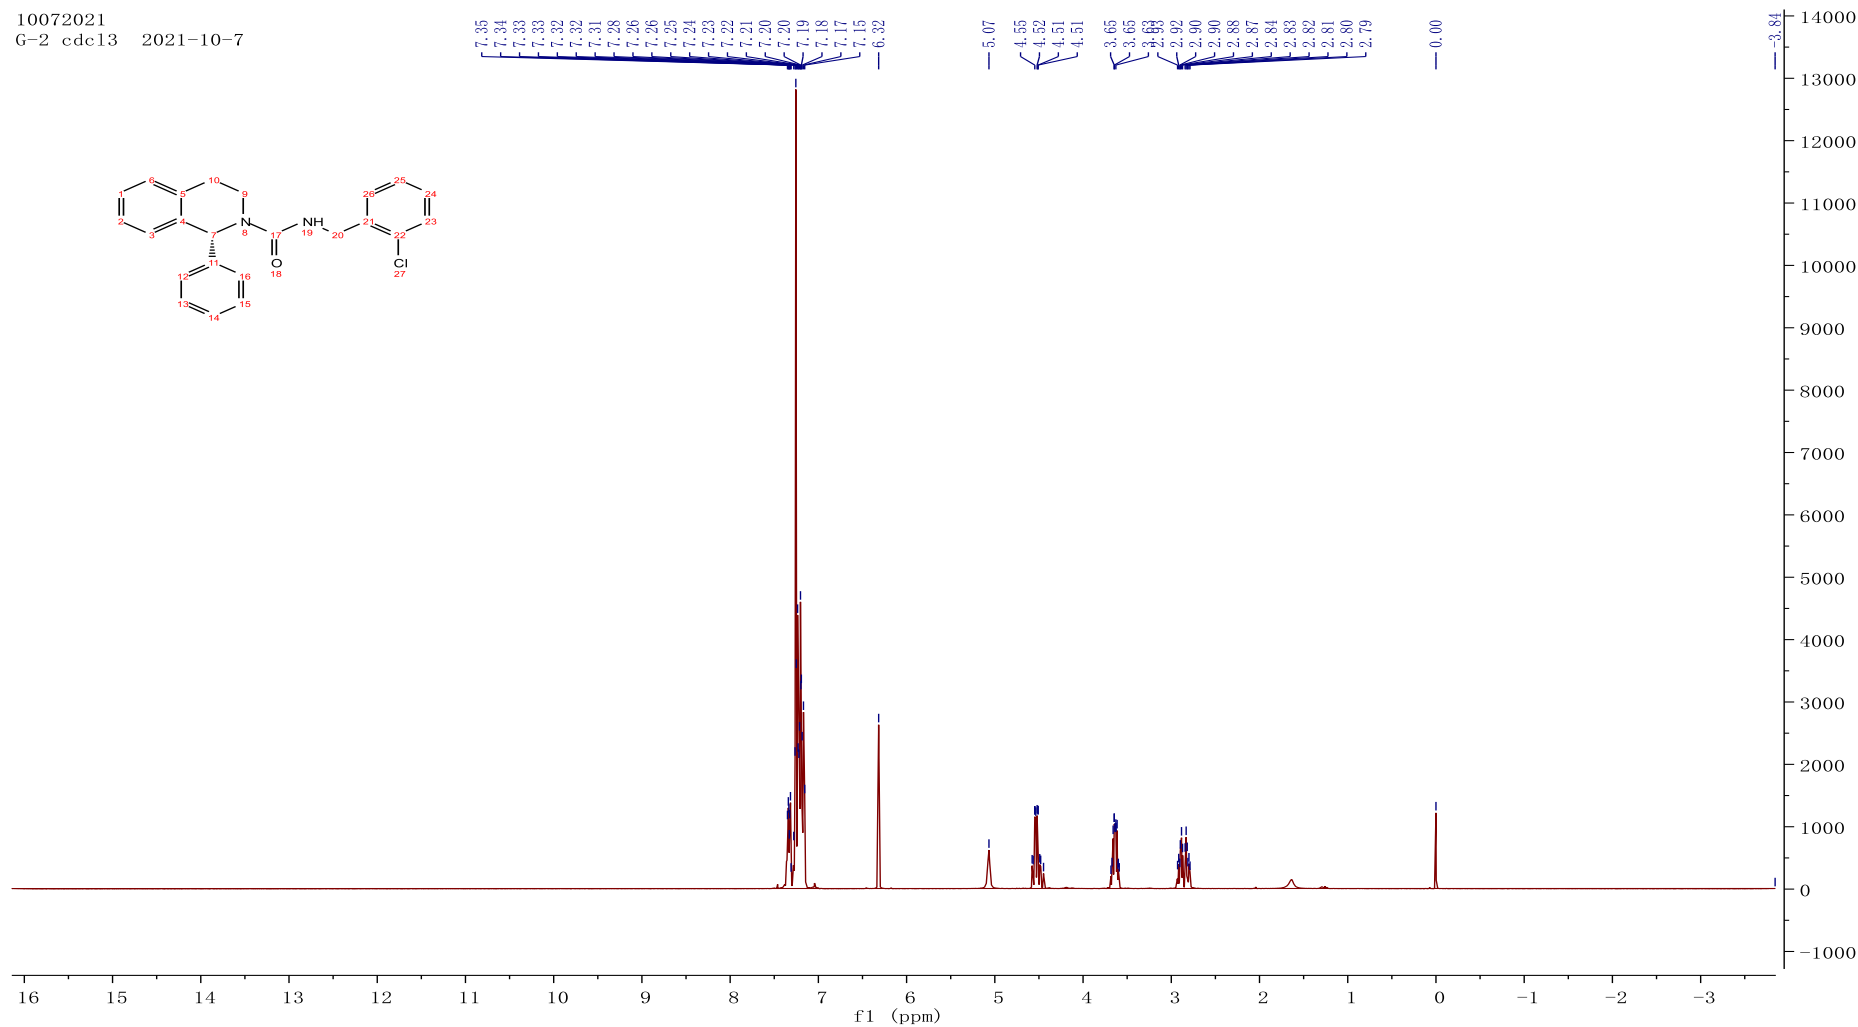

<sup>1</sup>H-NMR Spectral of **2e**

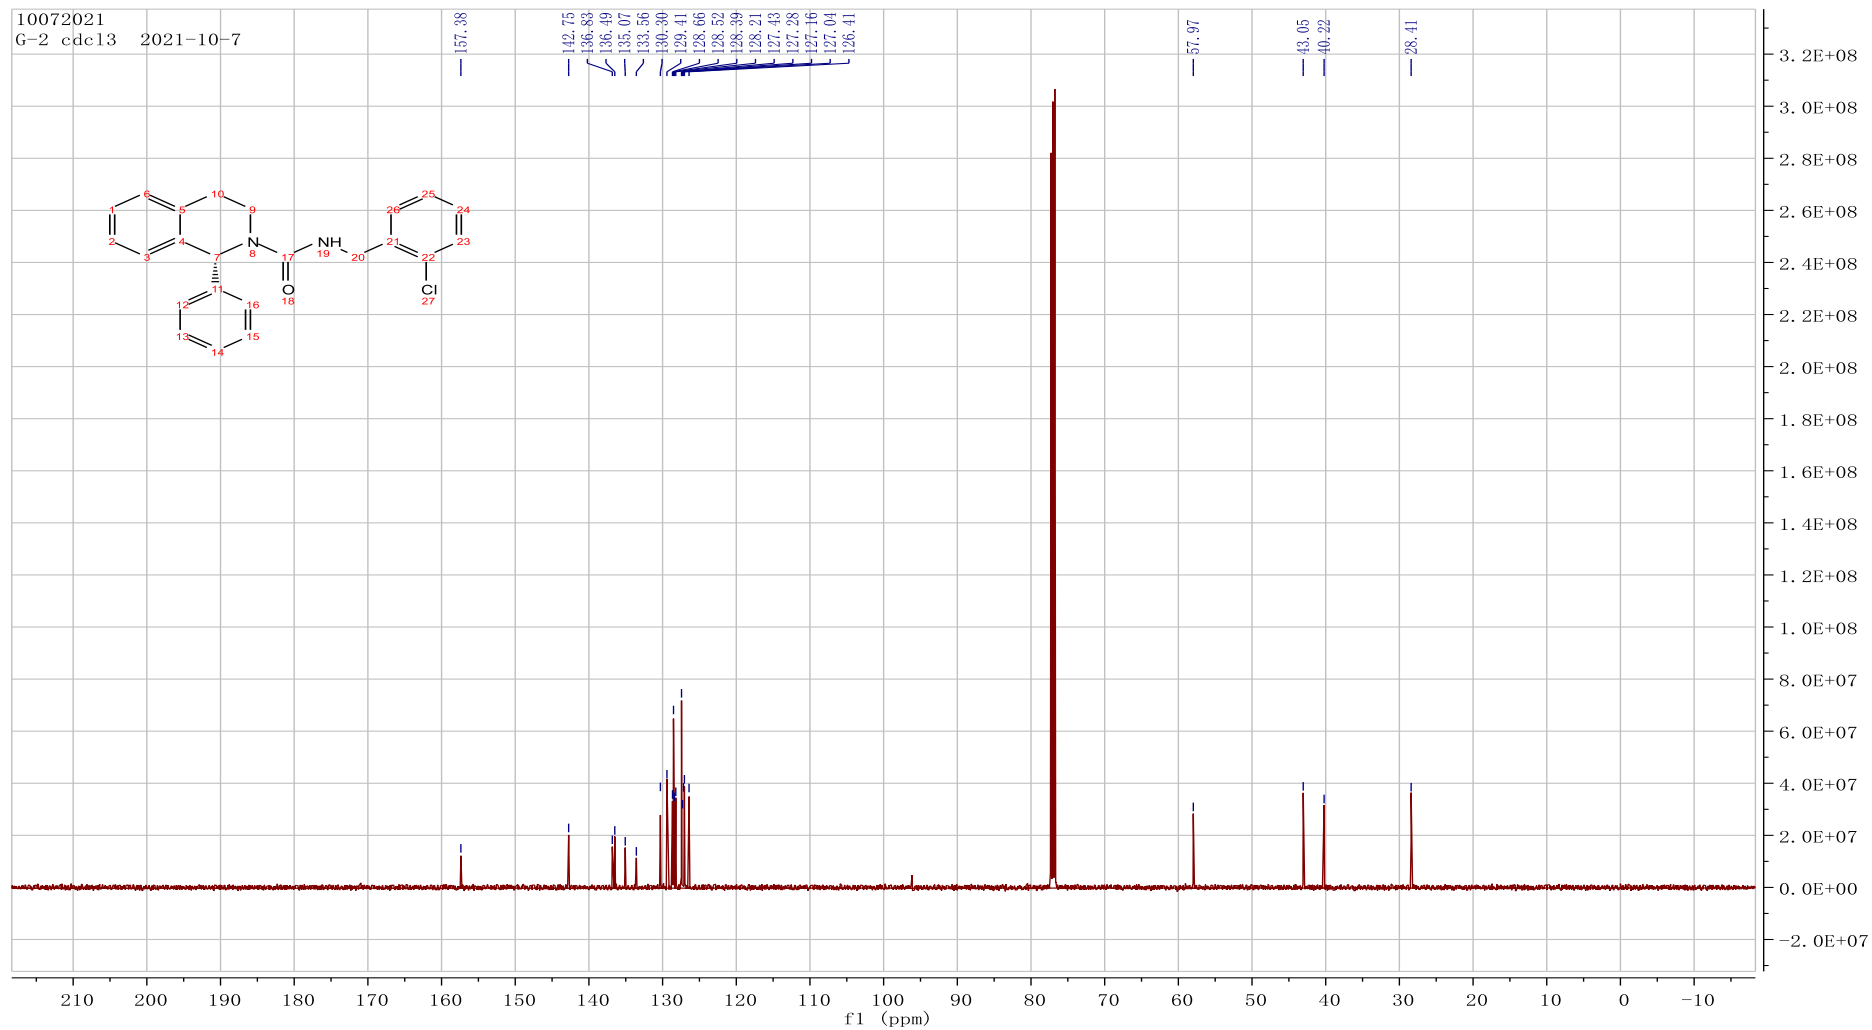

<sup>13</sup>C-NMR Spectral of **2e**

10072021  
G-3 cdc13 2021-10-7

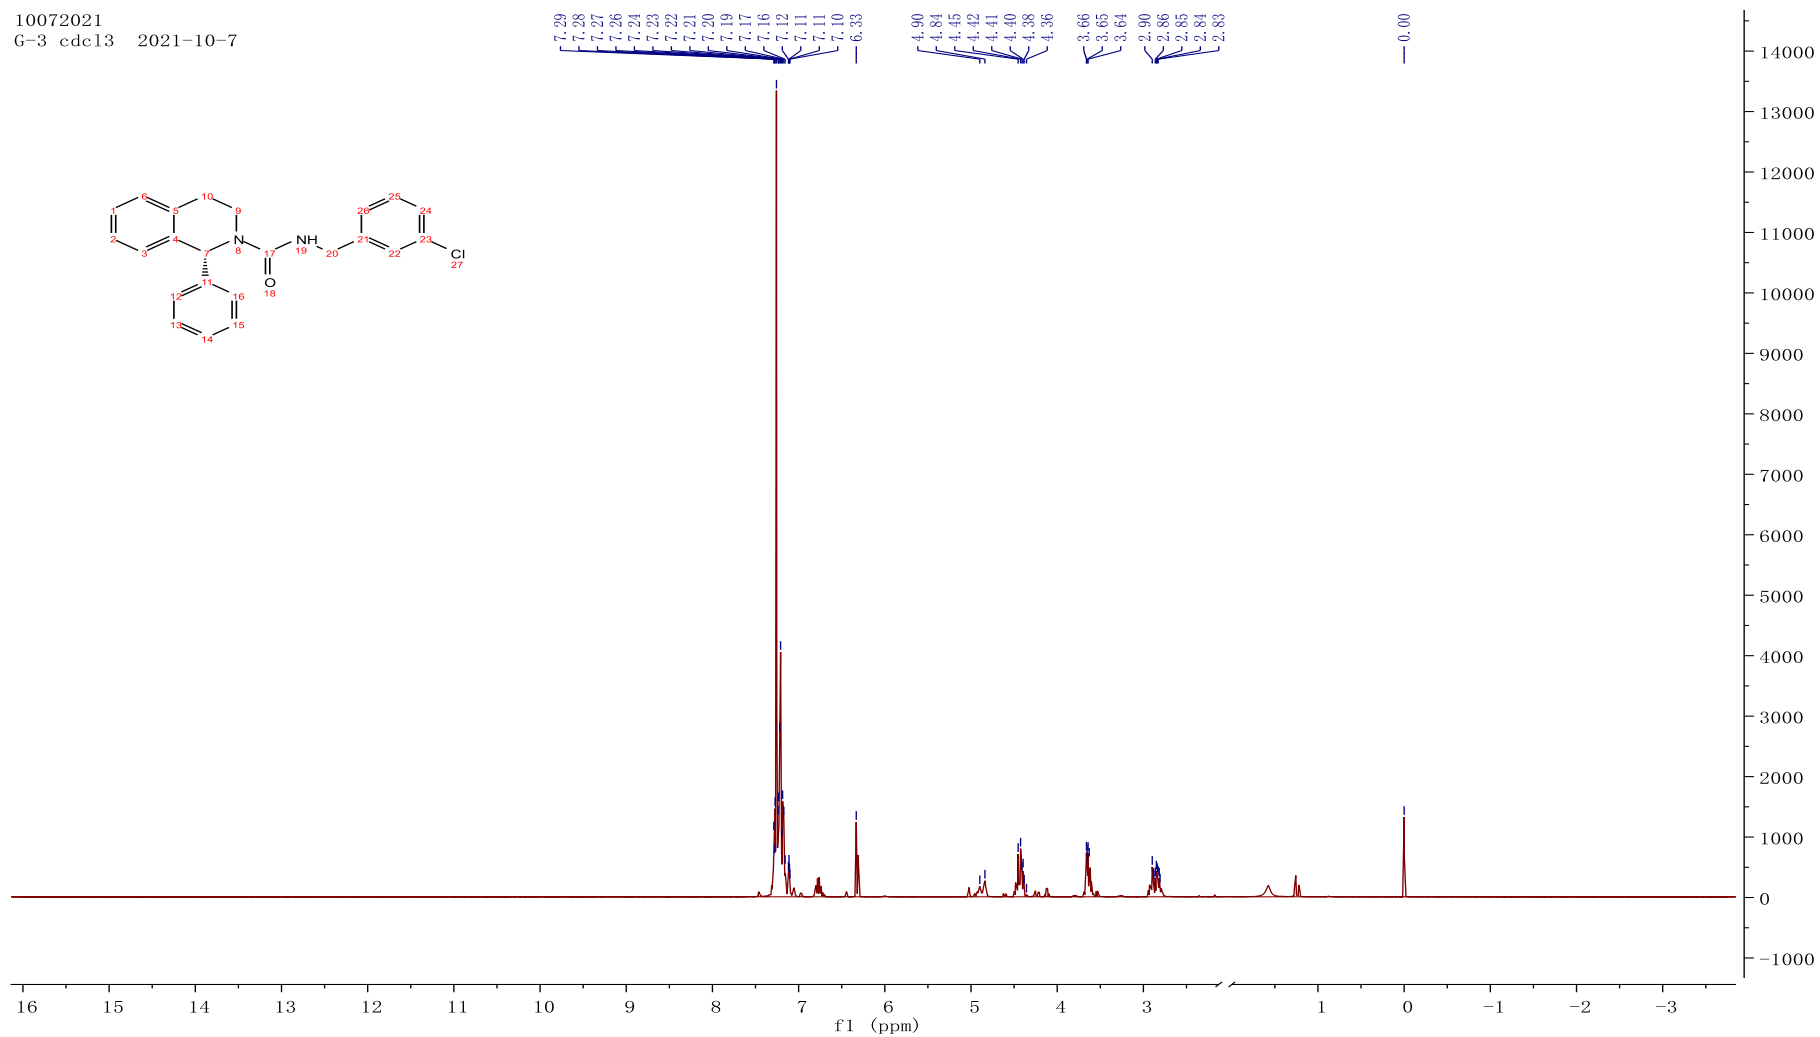

<sup>1</sup>H-NMR Spectral of **2f**

10072021  
G-3 cdc13 2021-10-7

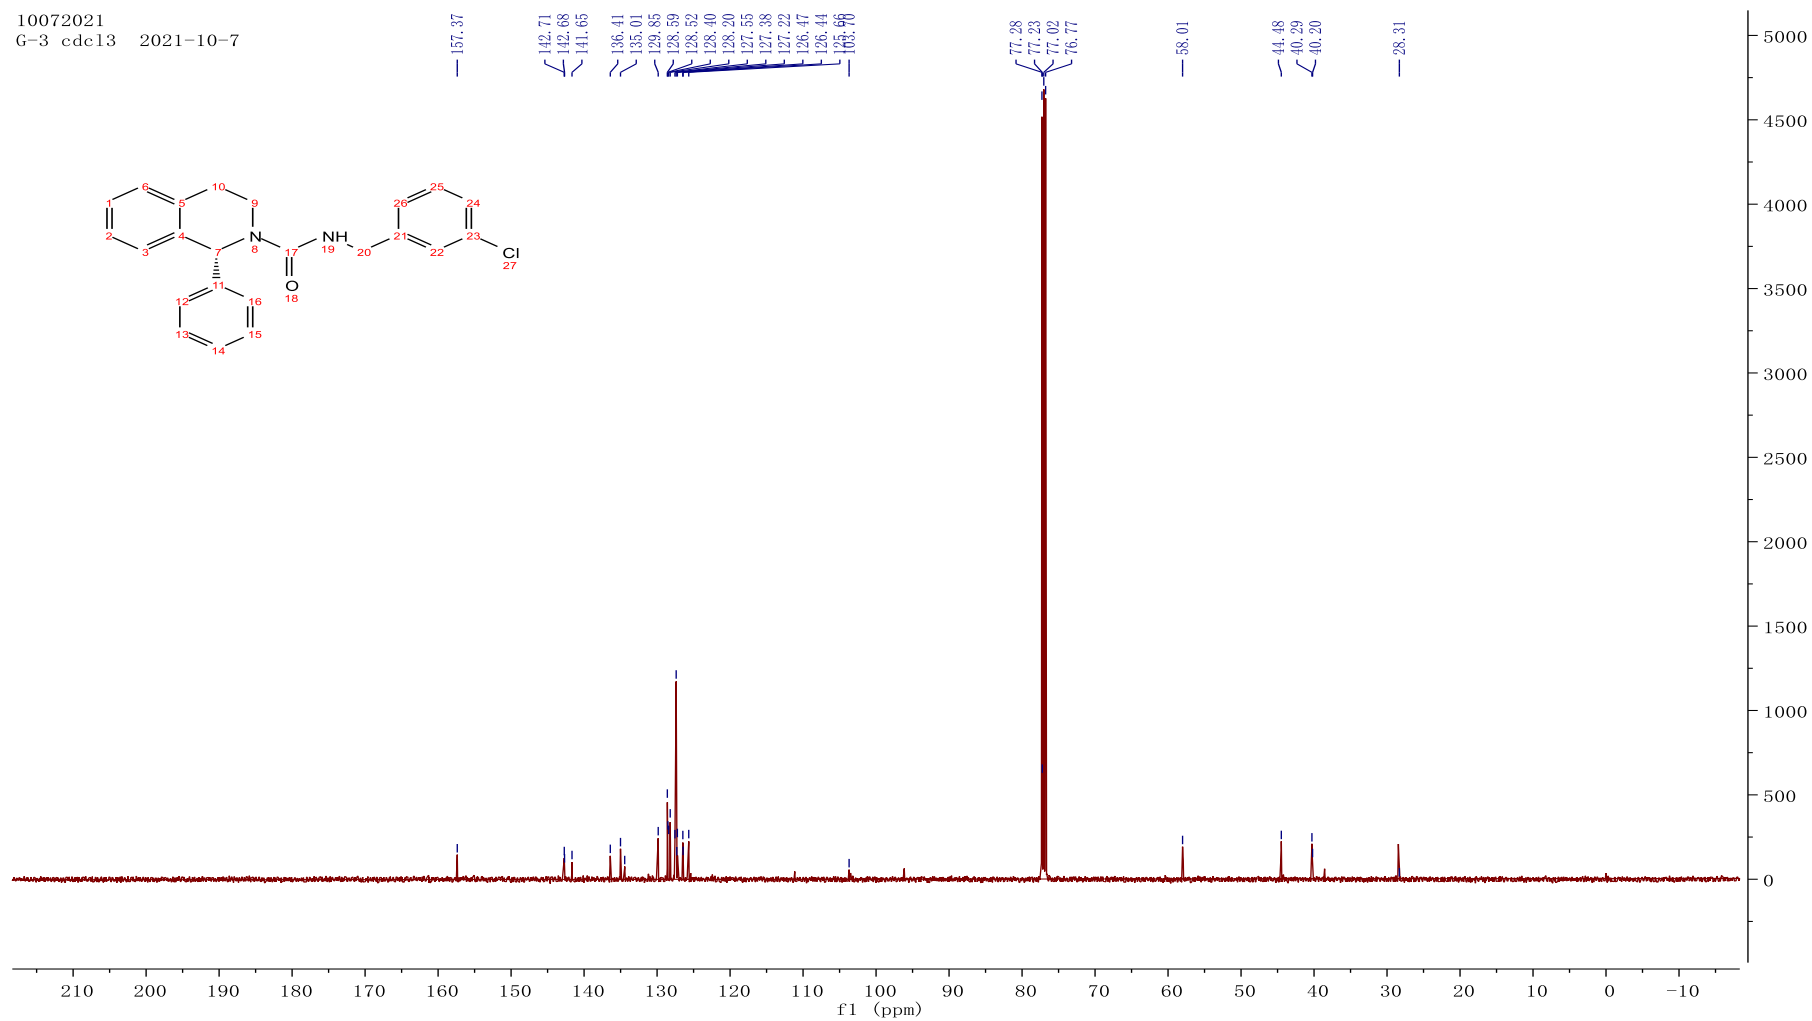

<sup>13</sup>C-NMR Spectral of **2f**

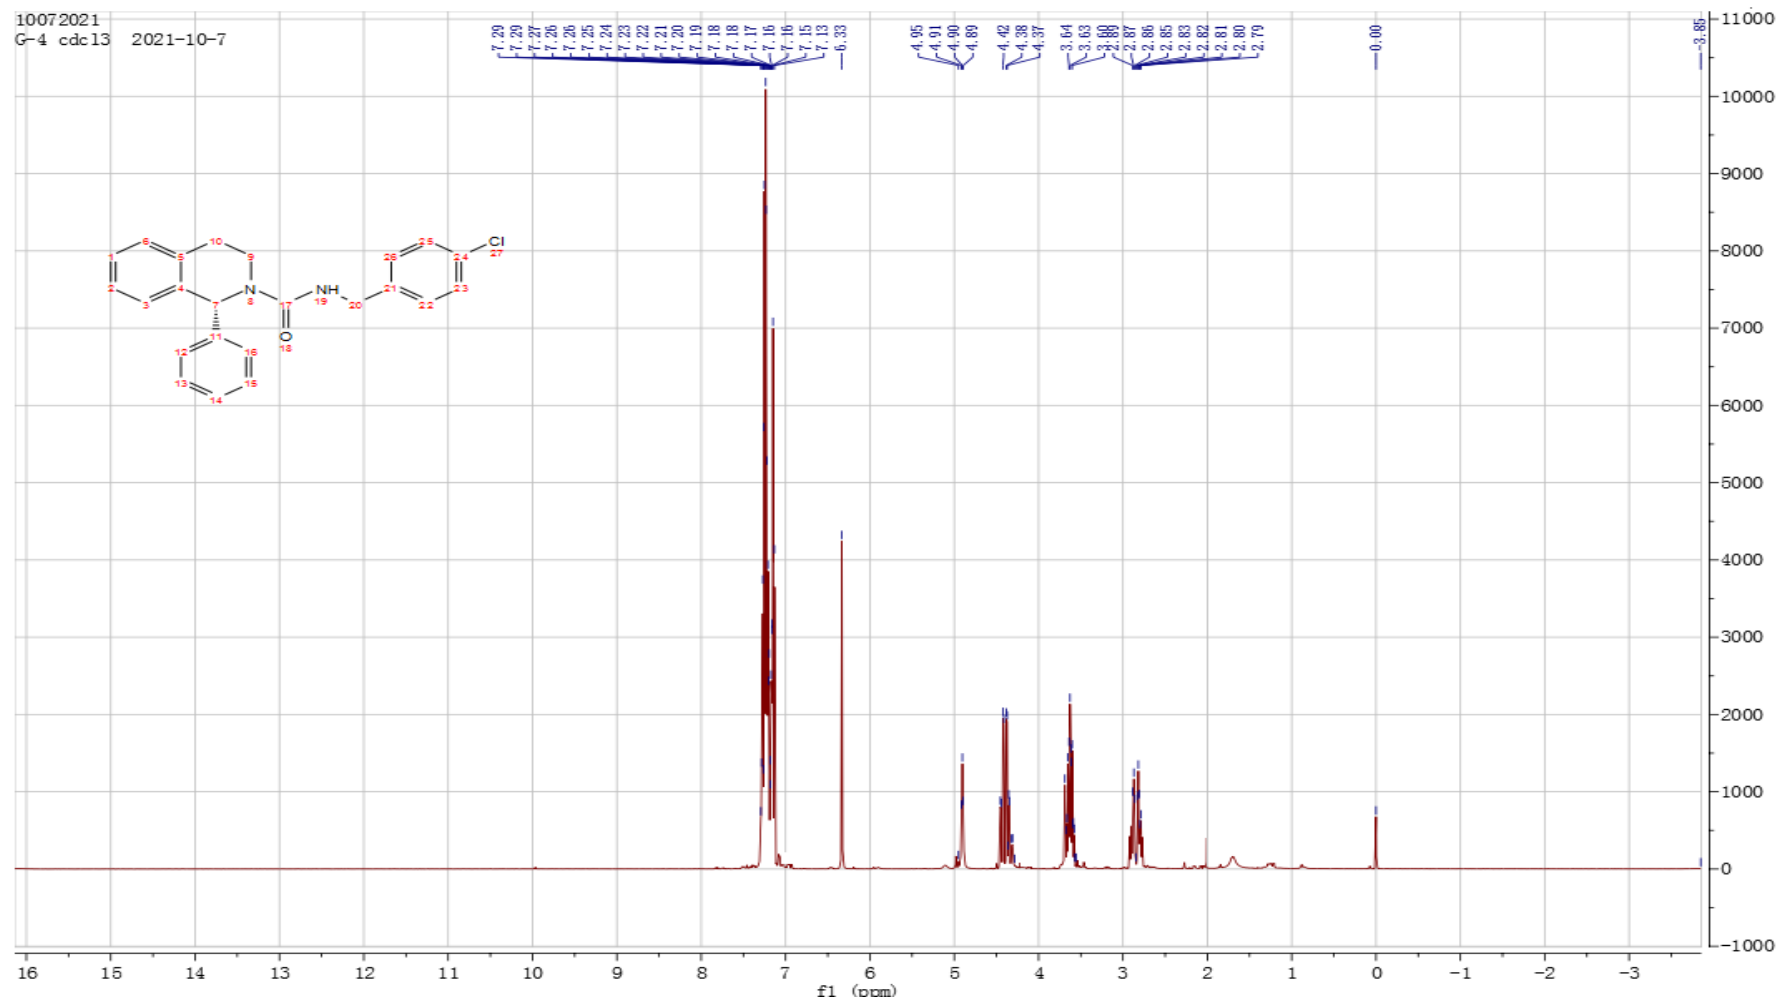

<sup>1</sup>H-NMR Spectral of 2g

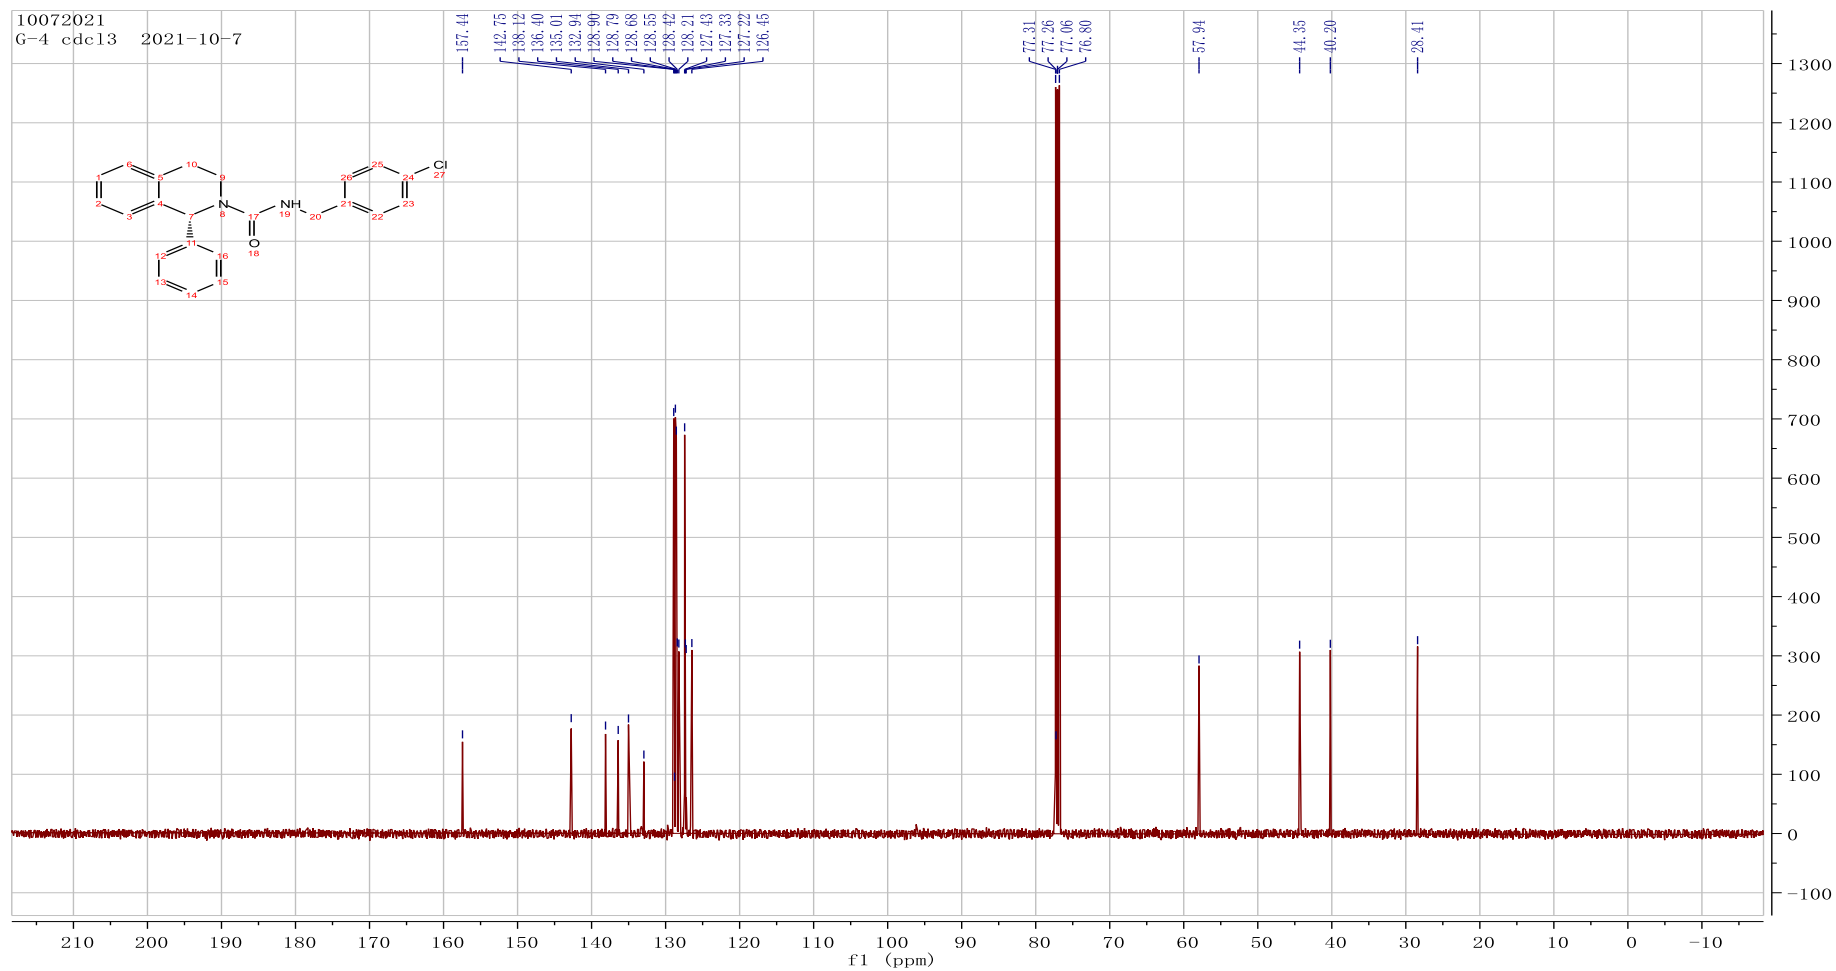

<sup>13</sup>C-NMR Spectral of **2g**

07122021  
G-9 cdcl3 2021-7-12

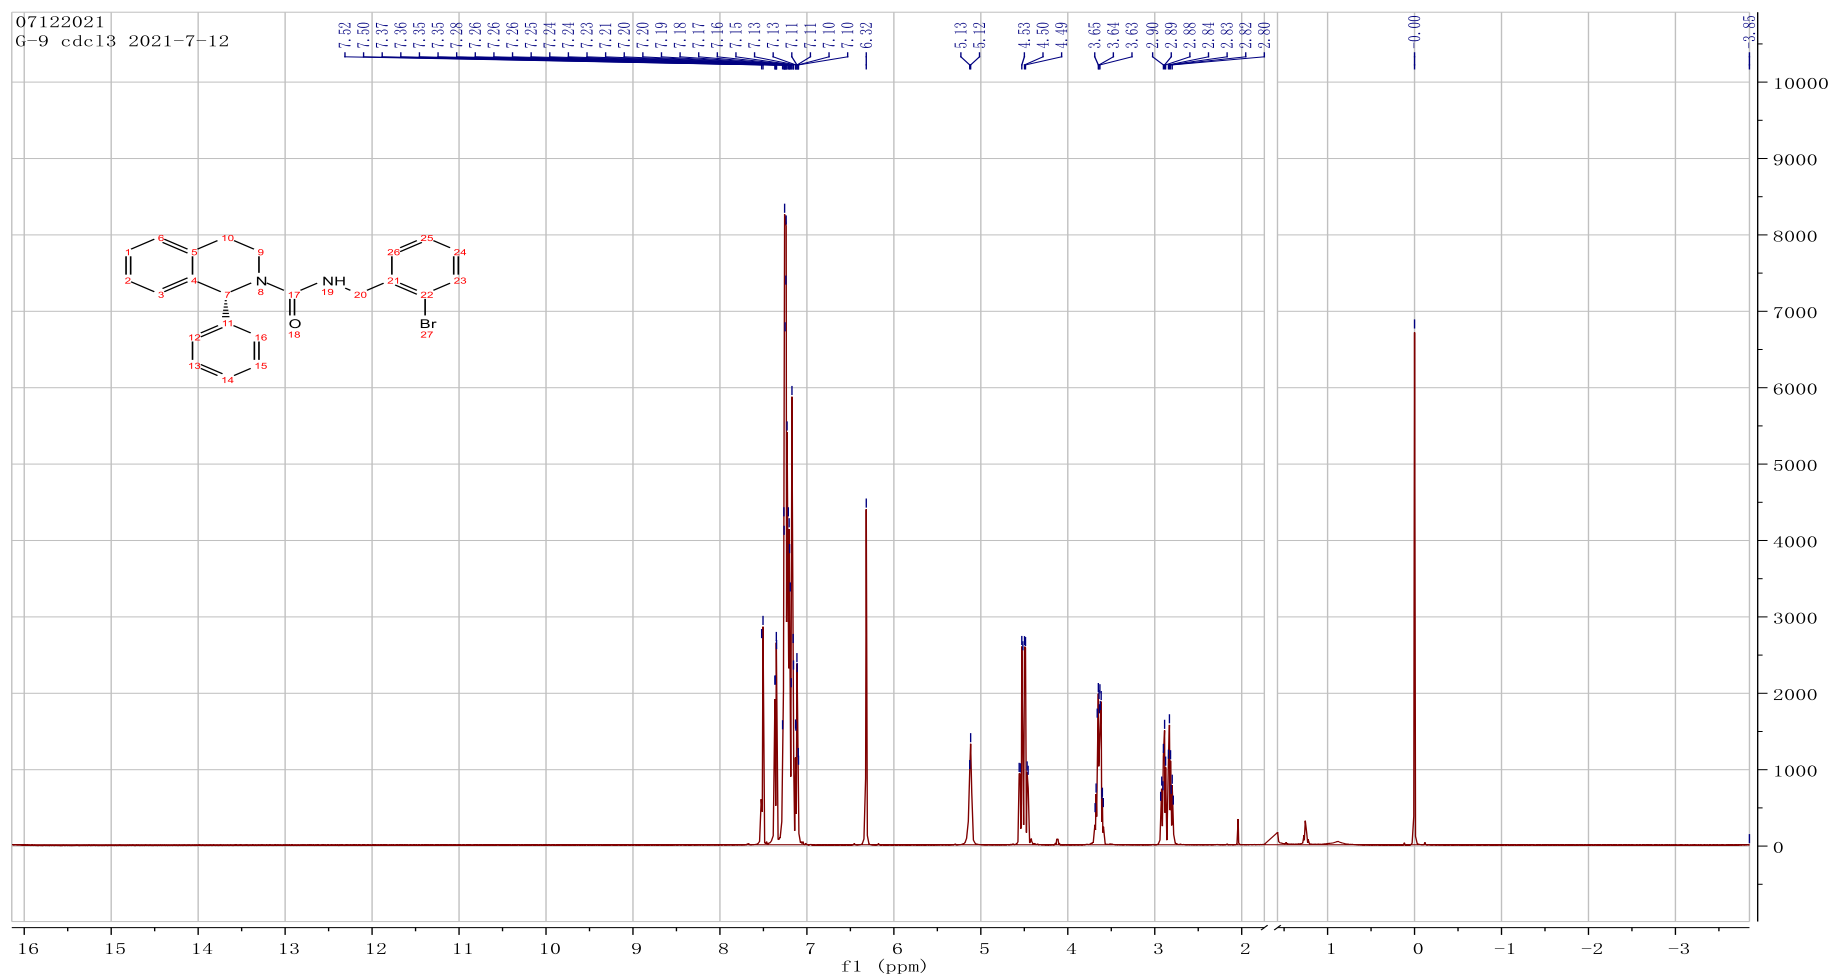

$^1\text{H-NMR}$  Spectral of **2h**

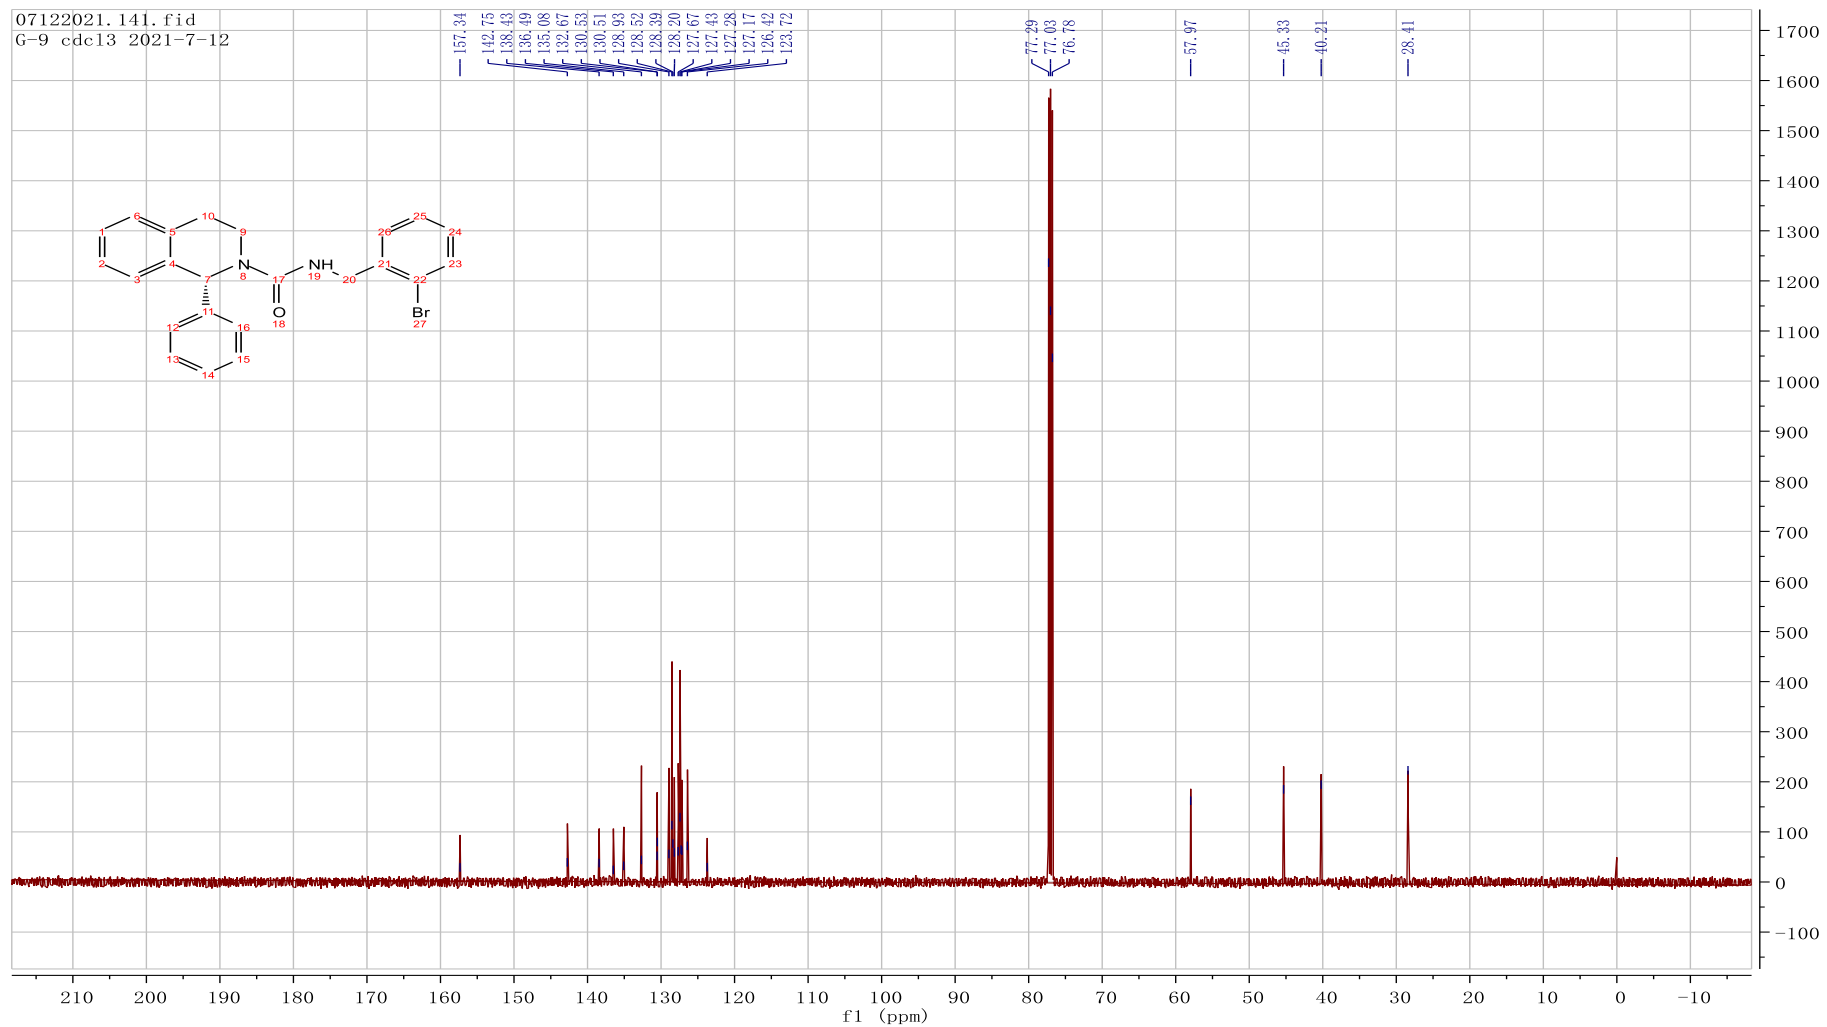

<sup>13</sup>C-NMR Spectral of **2h**





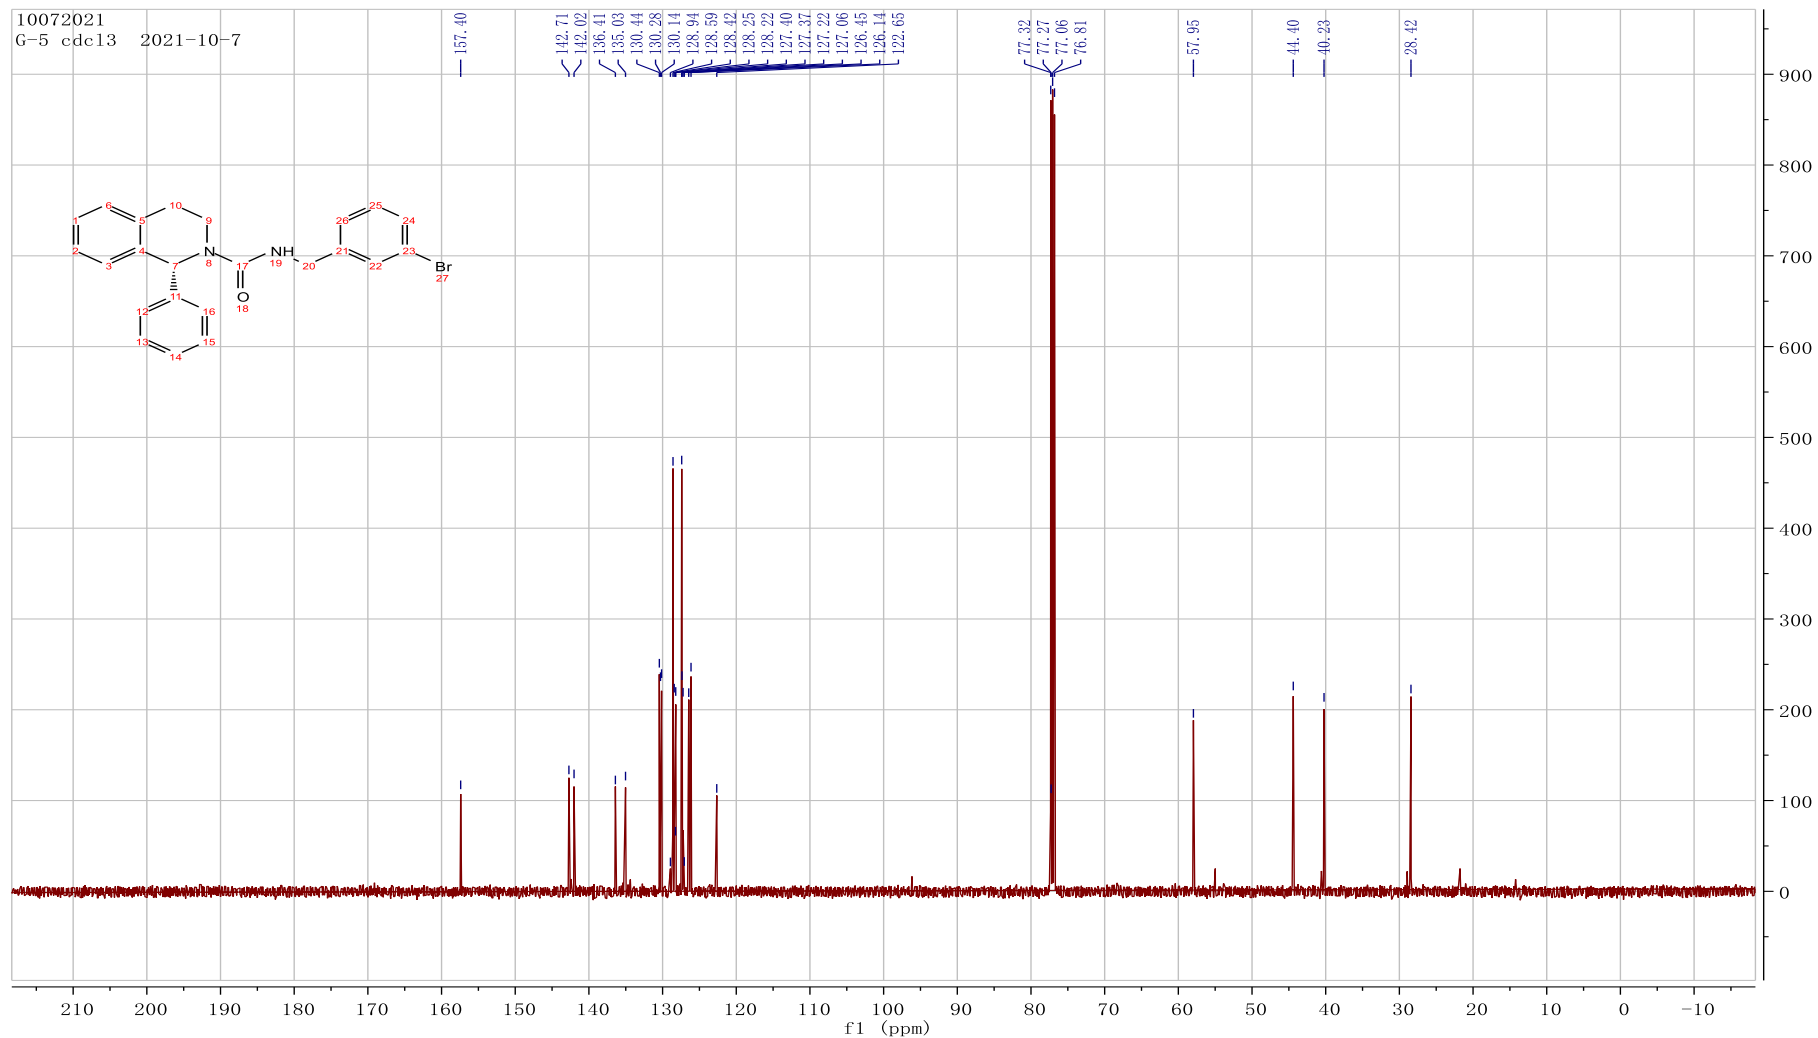

<sup>13</sup>C-NMR Spectral of **2i**

10072021  
G-6 cdc13 2021-10-7

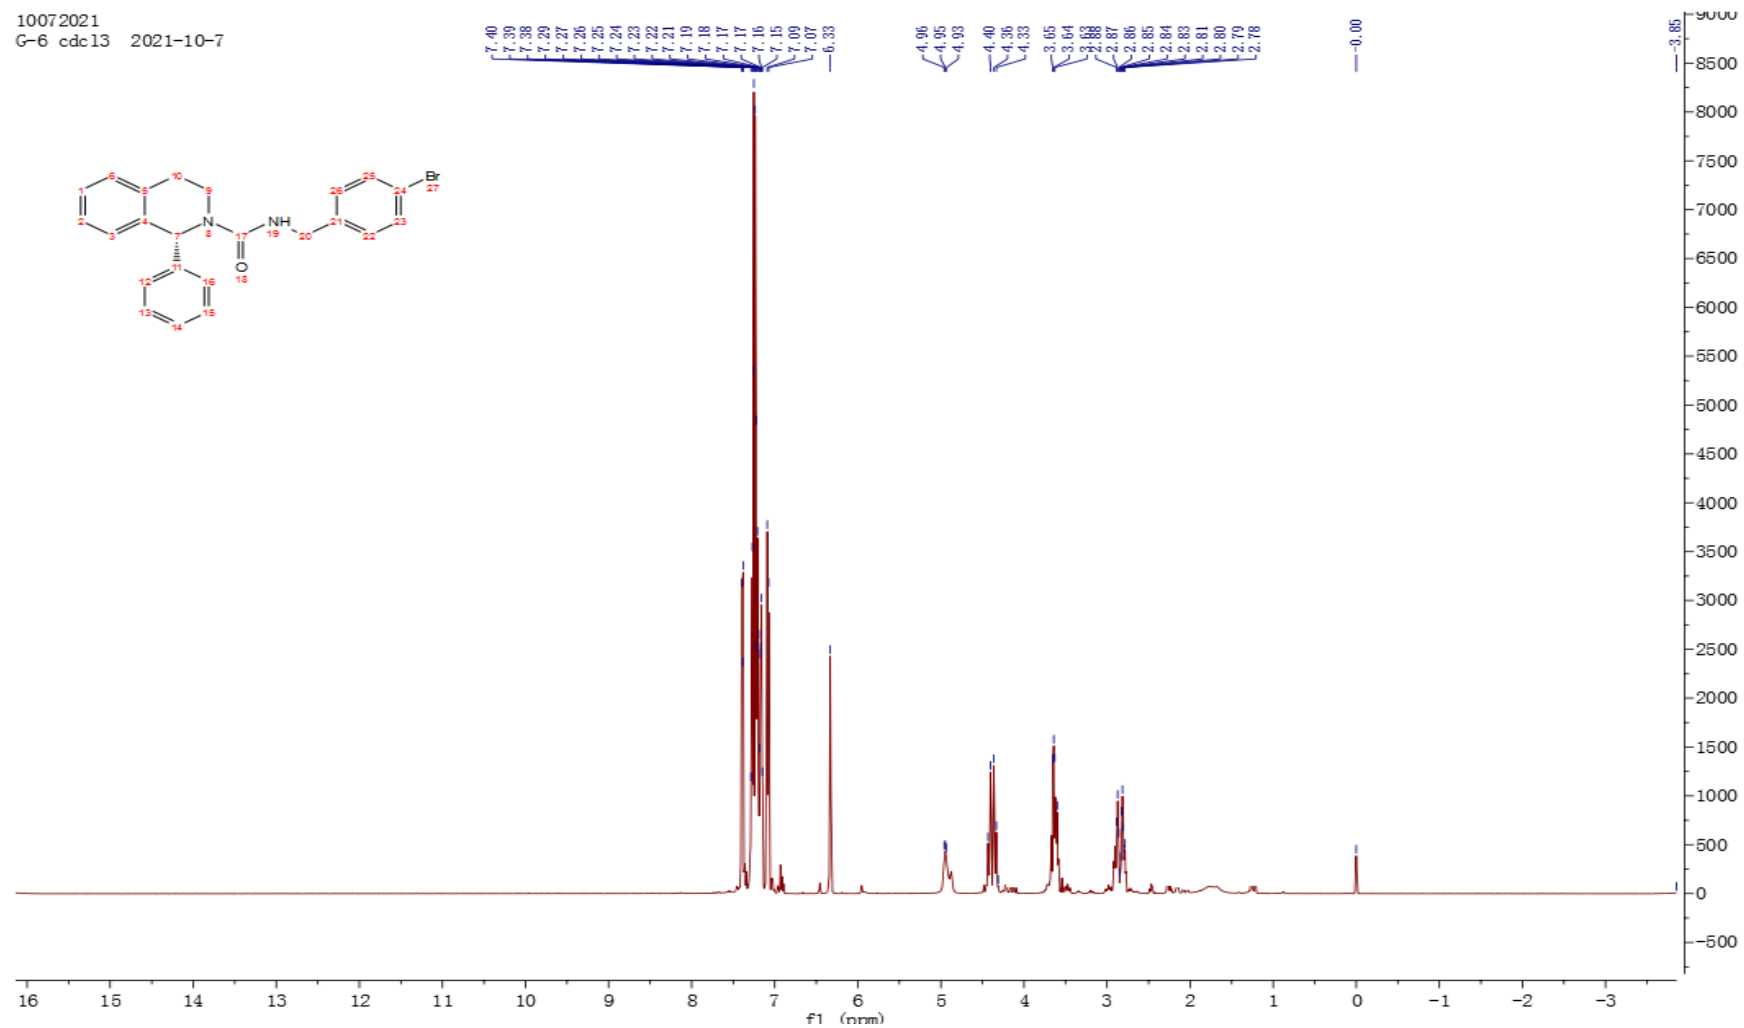<sup>1</sup>H-NMR Spectral of **2j**

10072021  
G-6 cdc13 2021-10-7

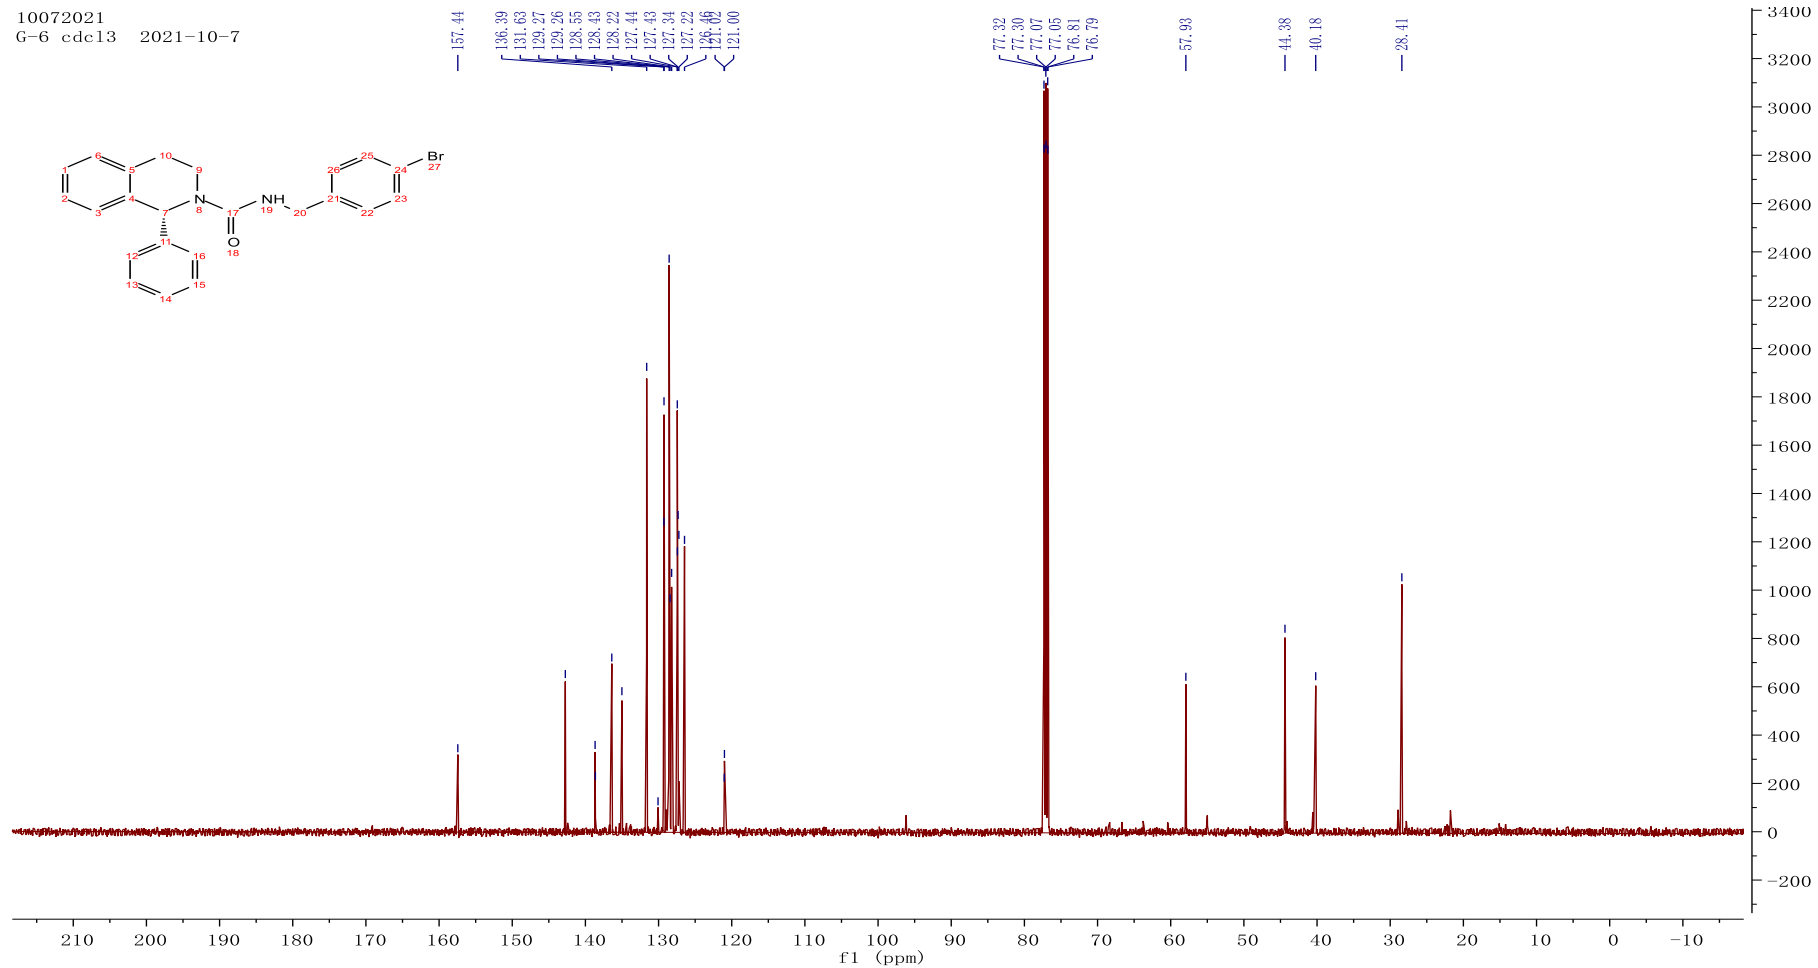

<sup>13</sup>C-NMR Spectral of **2j**

10072021

6-7 cdc13 2021-10-7

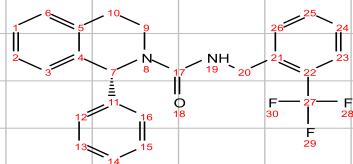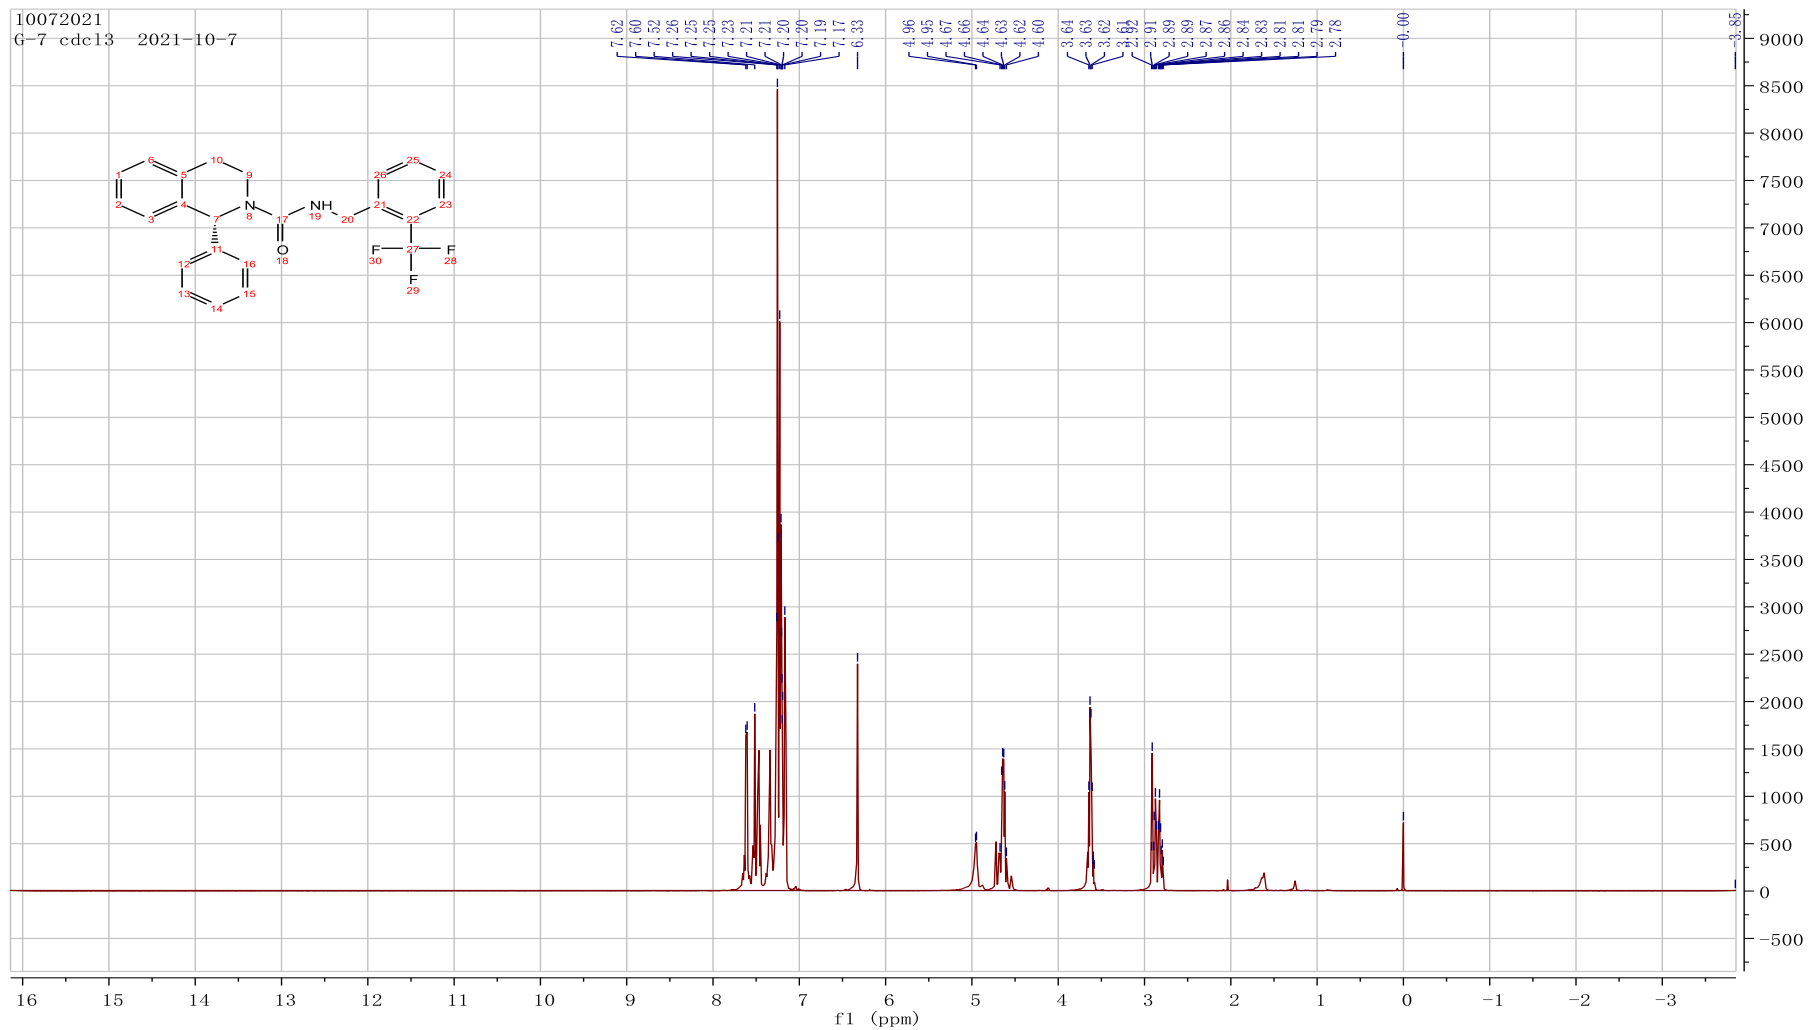 $^1\text{H}$ -NMR Spectral of **2k**

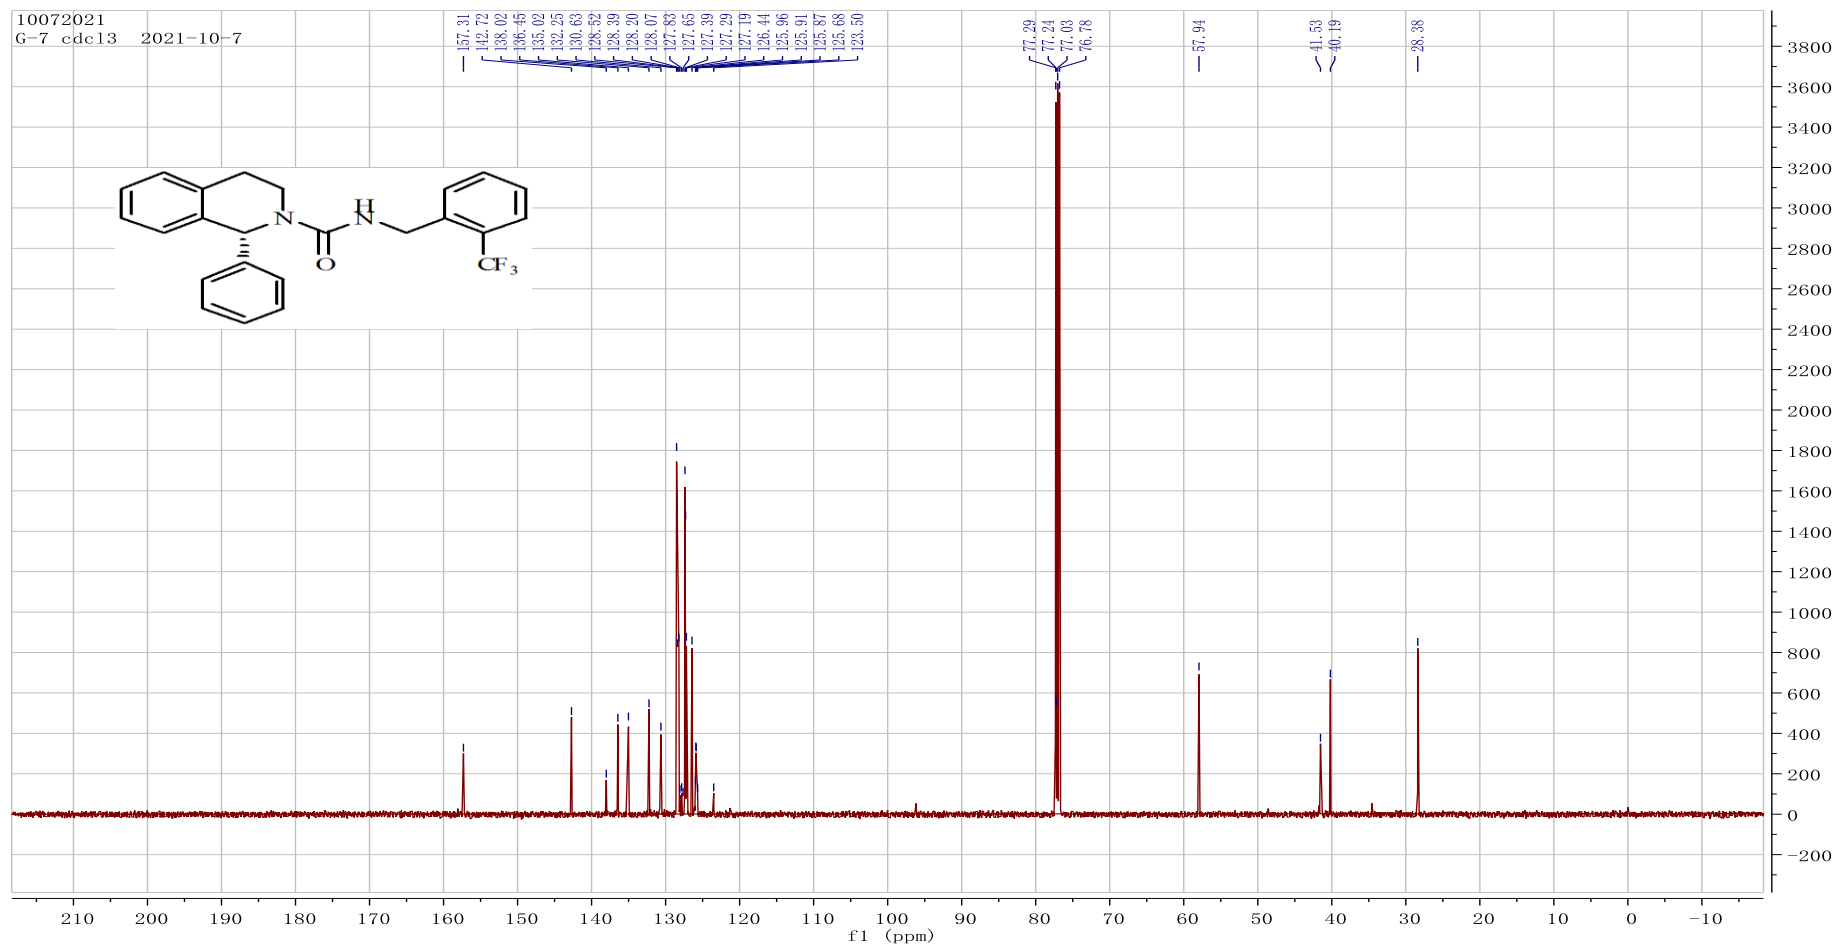

<sup>13</sup>C-NMR Spectral of **2k**

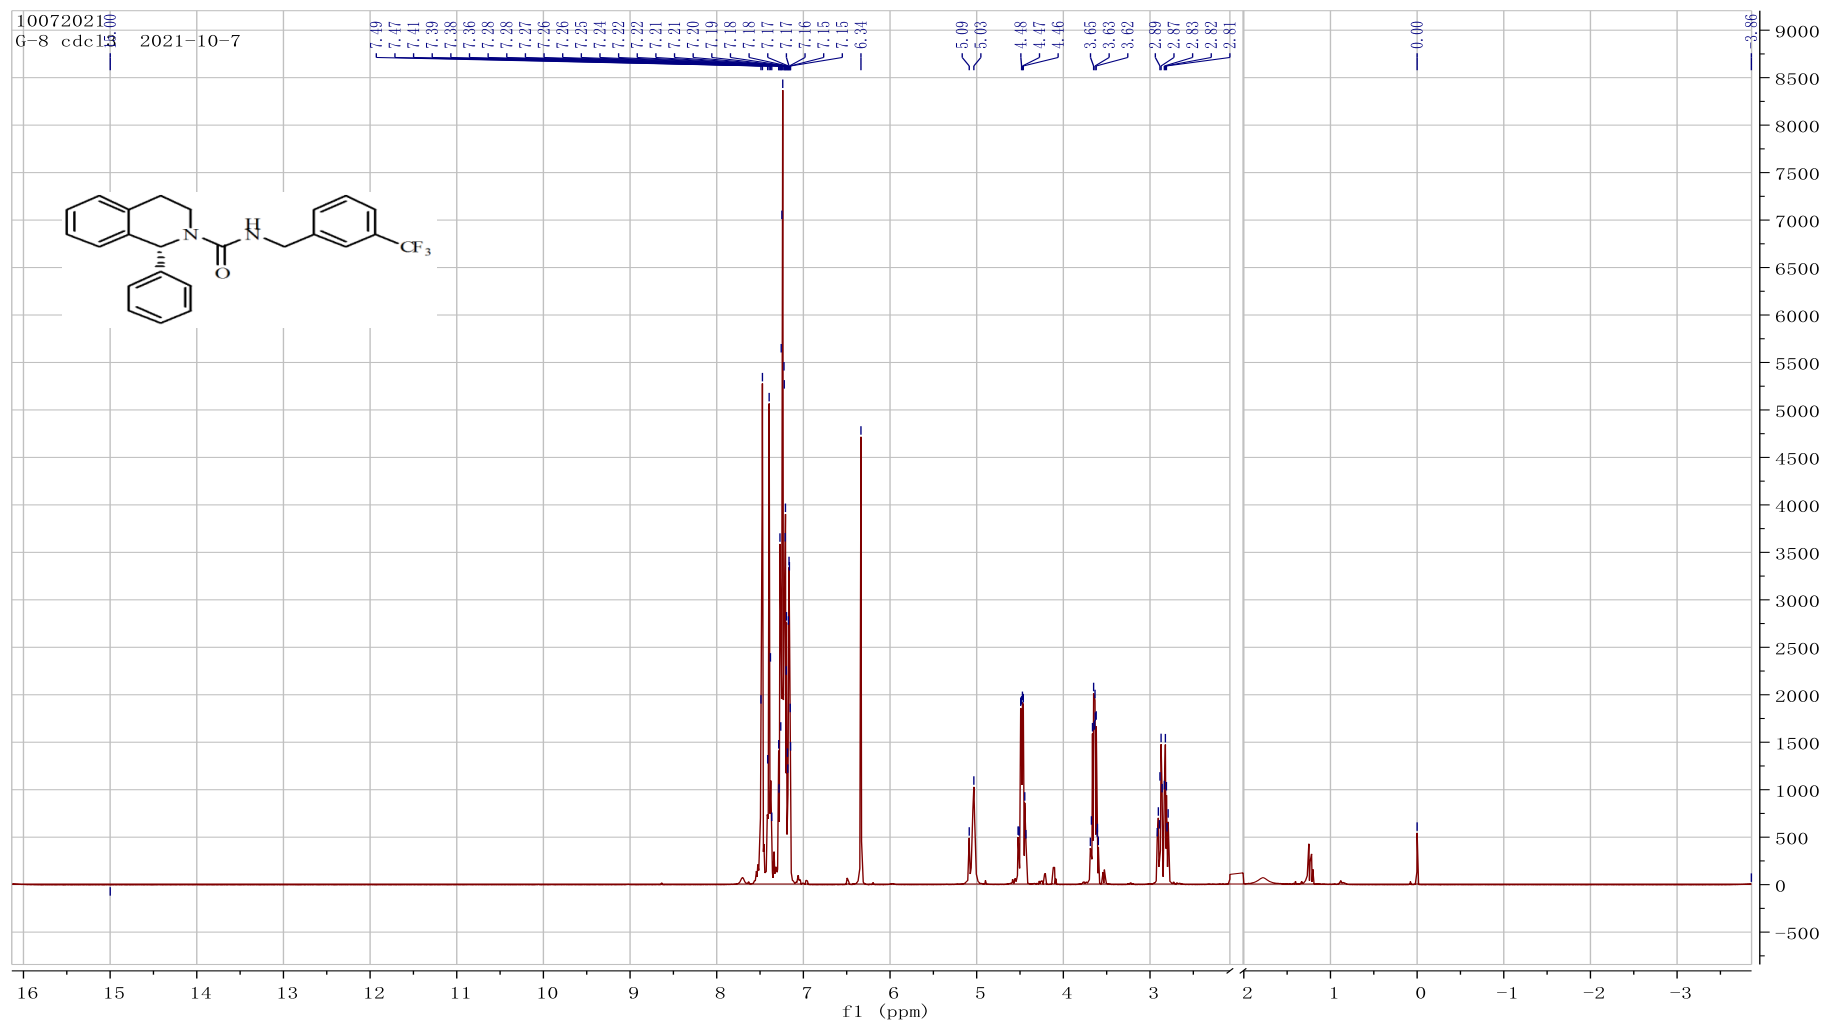

<sup>1</sup>H-NMR Spectral of **21**

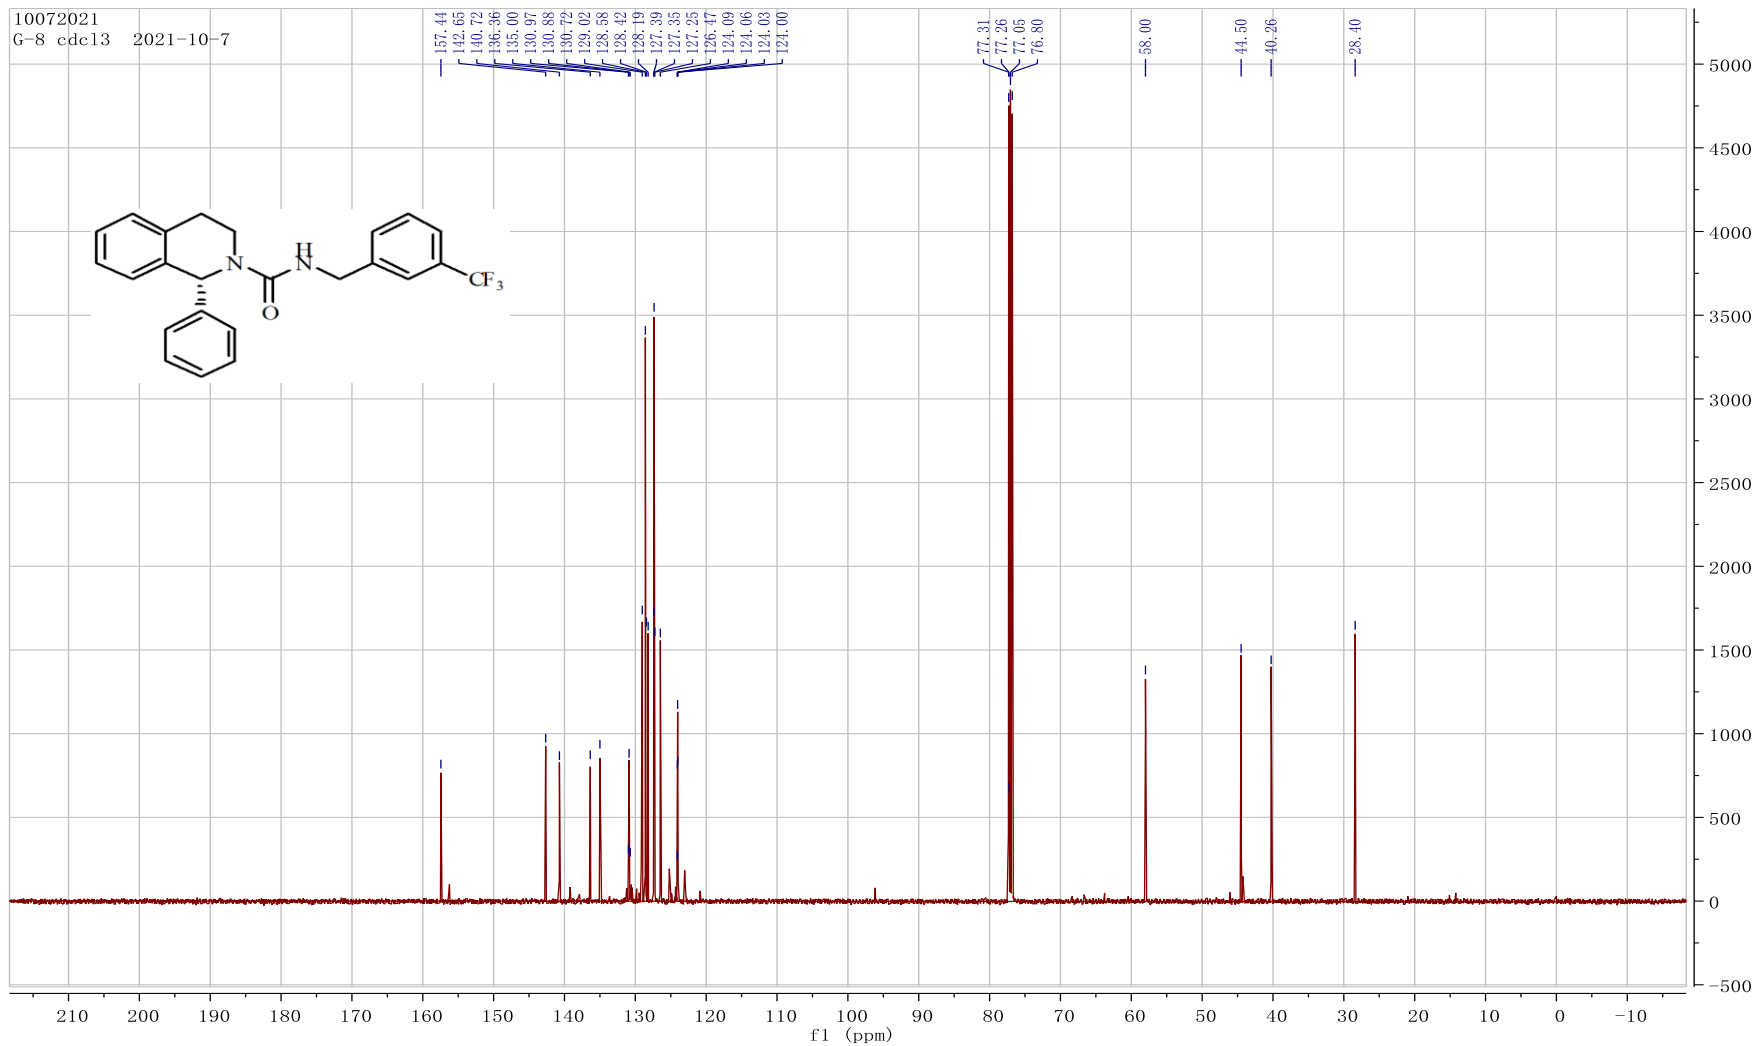

<sup>13</sup>C-NMR Spectral of **21**



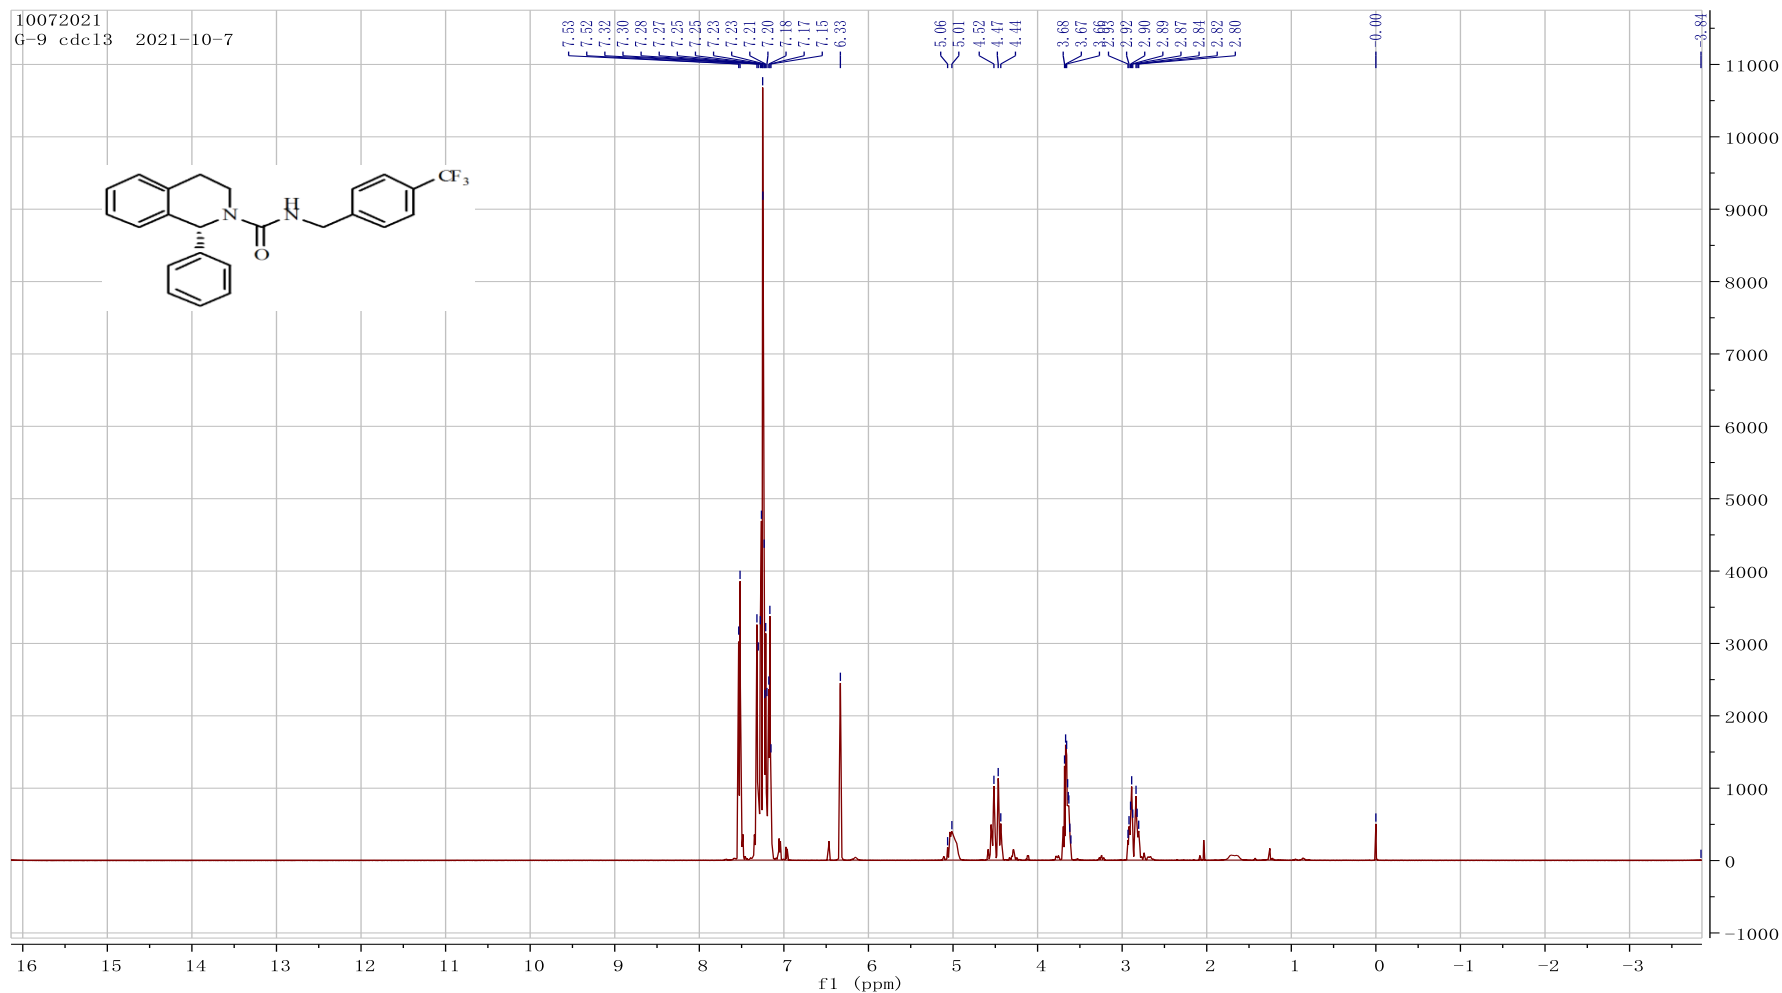

$^1\text{H}$ -NMR Spectral of **2m**

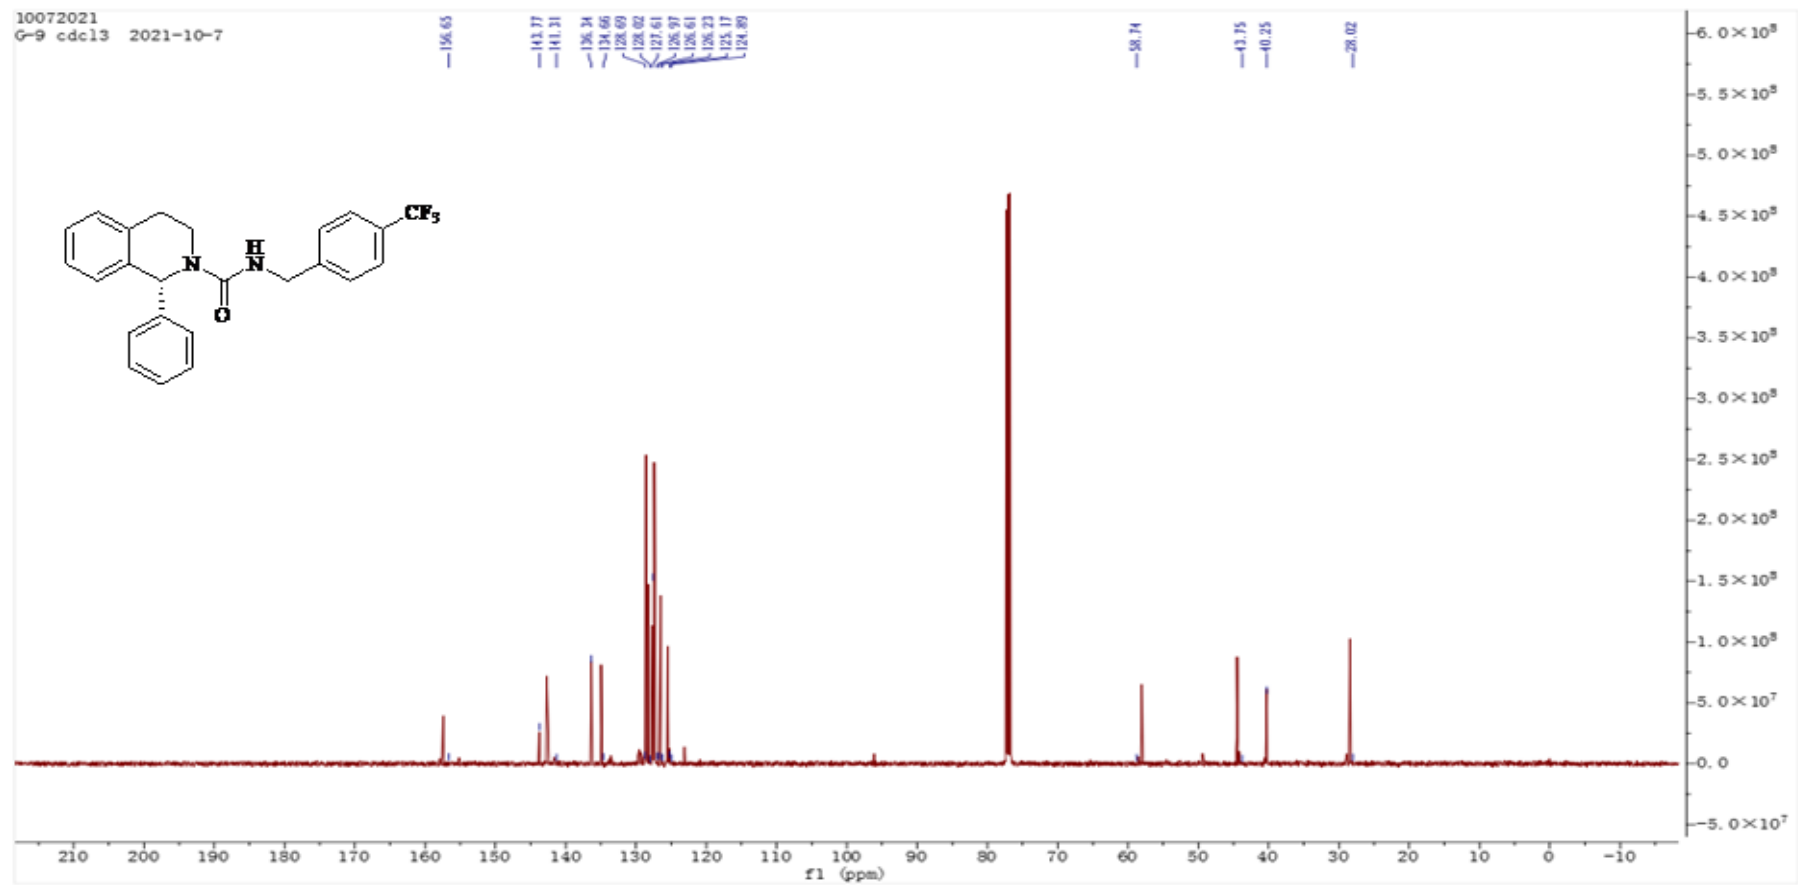

<sup>13</sup>C-NMR Spectral of **2m**

|      |       |           |
|------|-------|-----------|
| G-10 | cdc13 | 2021-10-7 |
|------|-------|-----------|

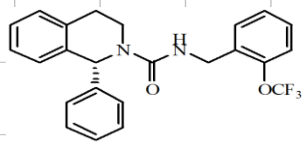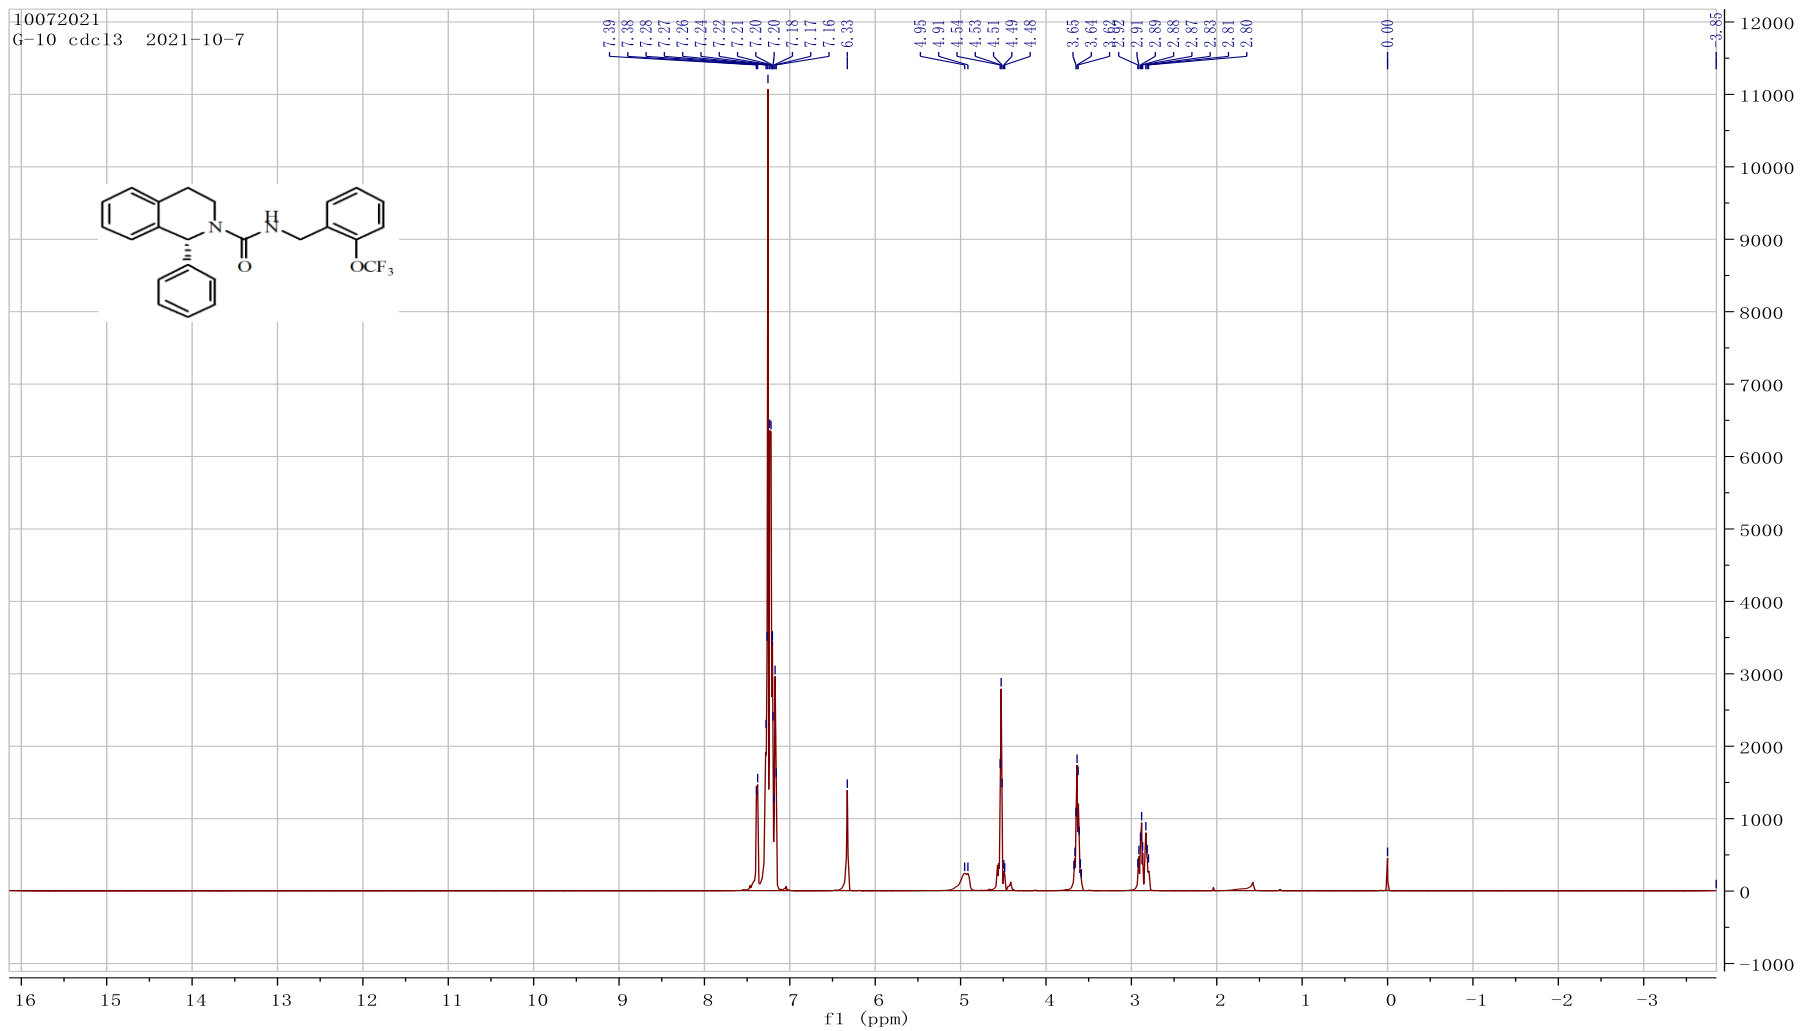

### <sup>1</sup>H-NMR Spectral of **2n**

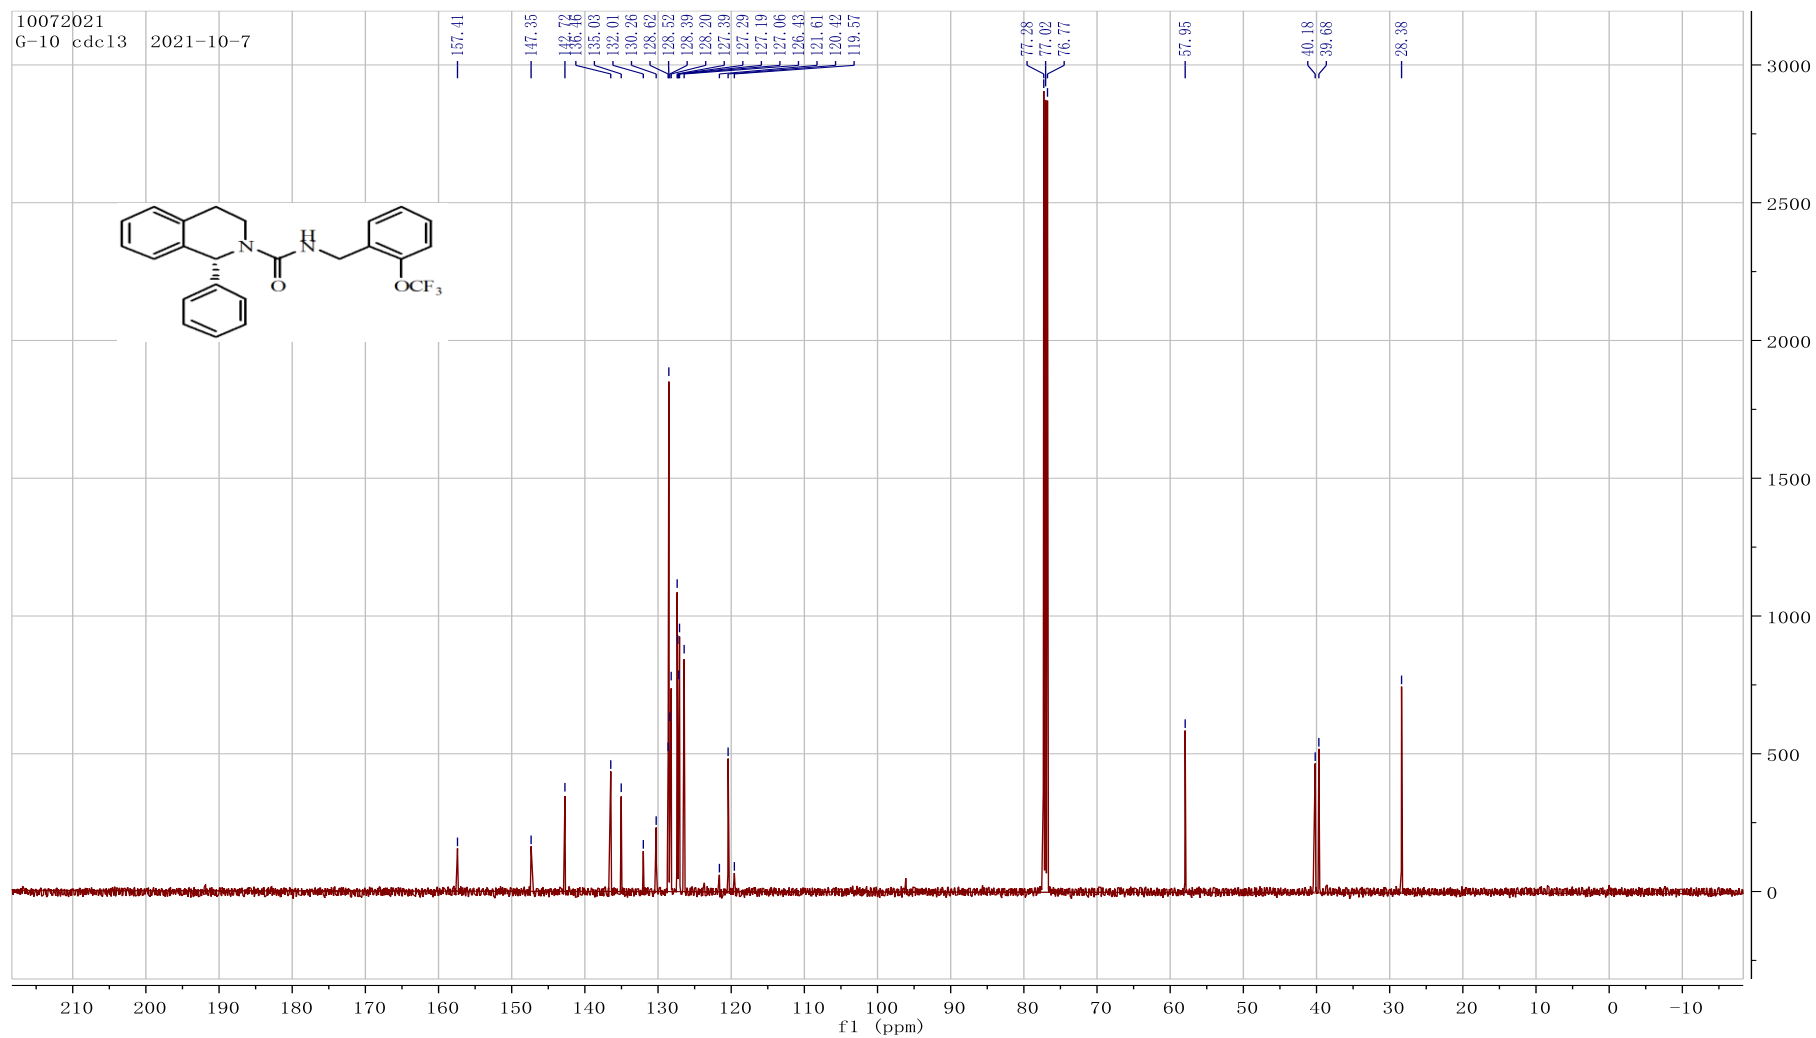

<sup>13</sup>C-NMR Spectral of **2n**

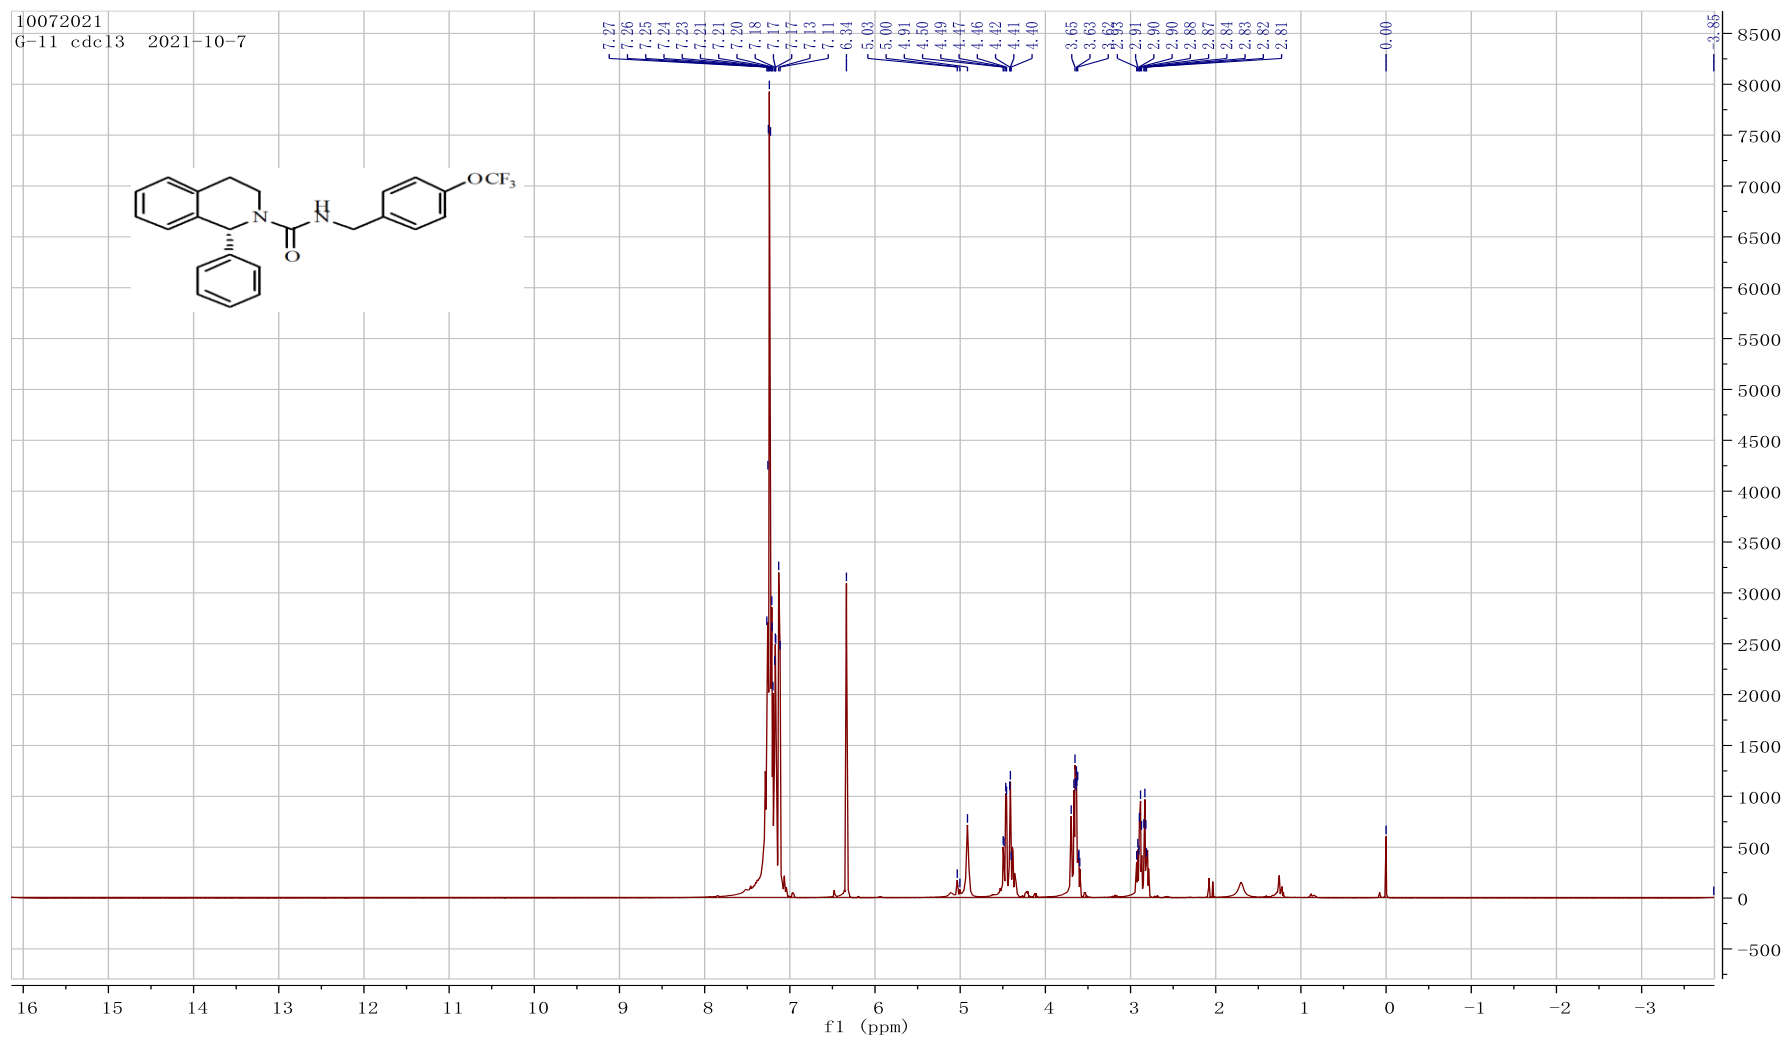

$^1\text{H}$ -NMR Spectral of **2o**

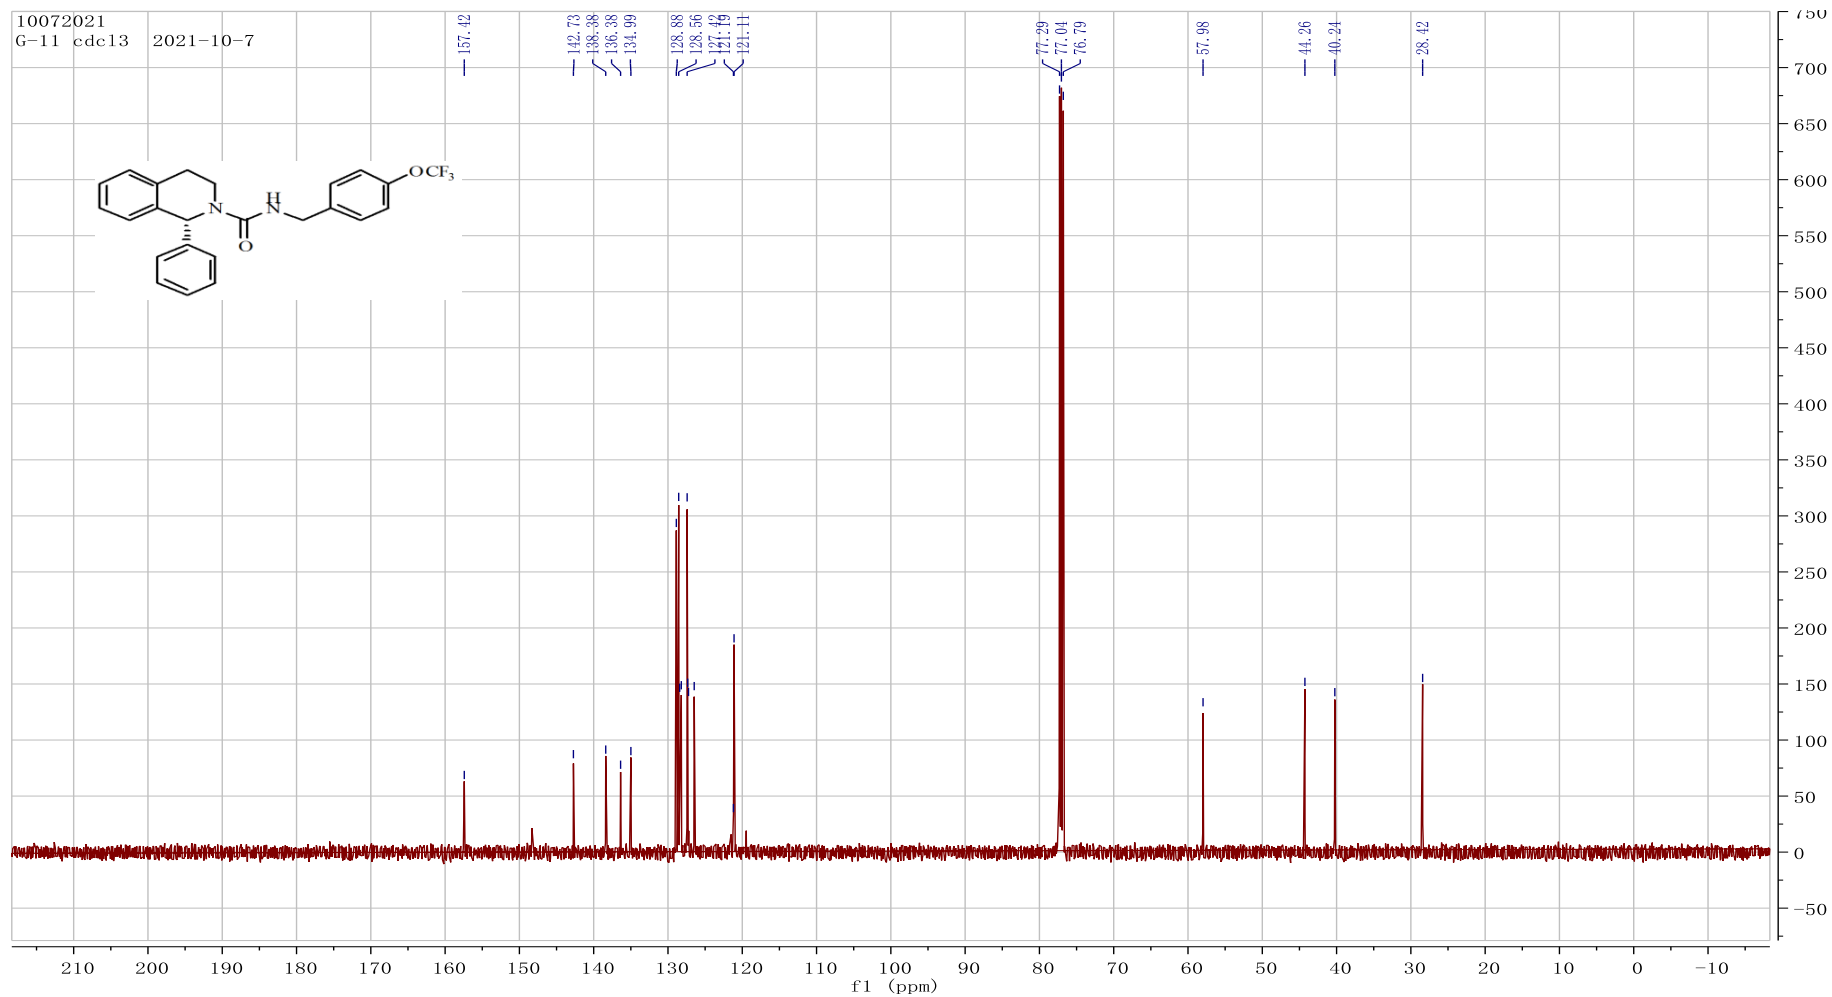

<sup>13</sup>C-NMR Spectral of **2o**

07122021  
G-4 cdc13 2021-7-12

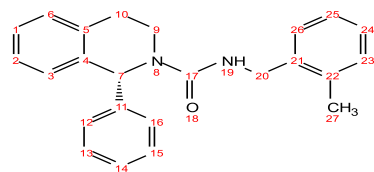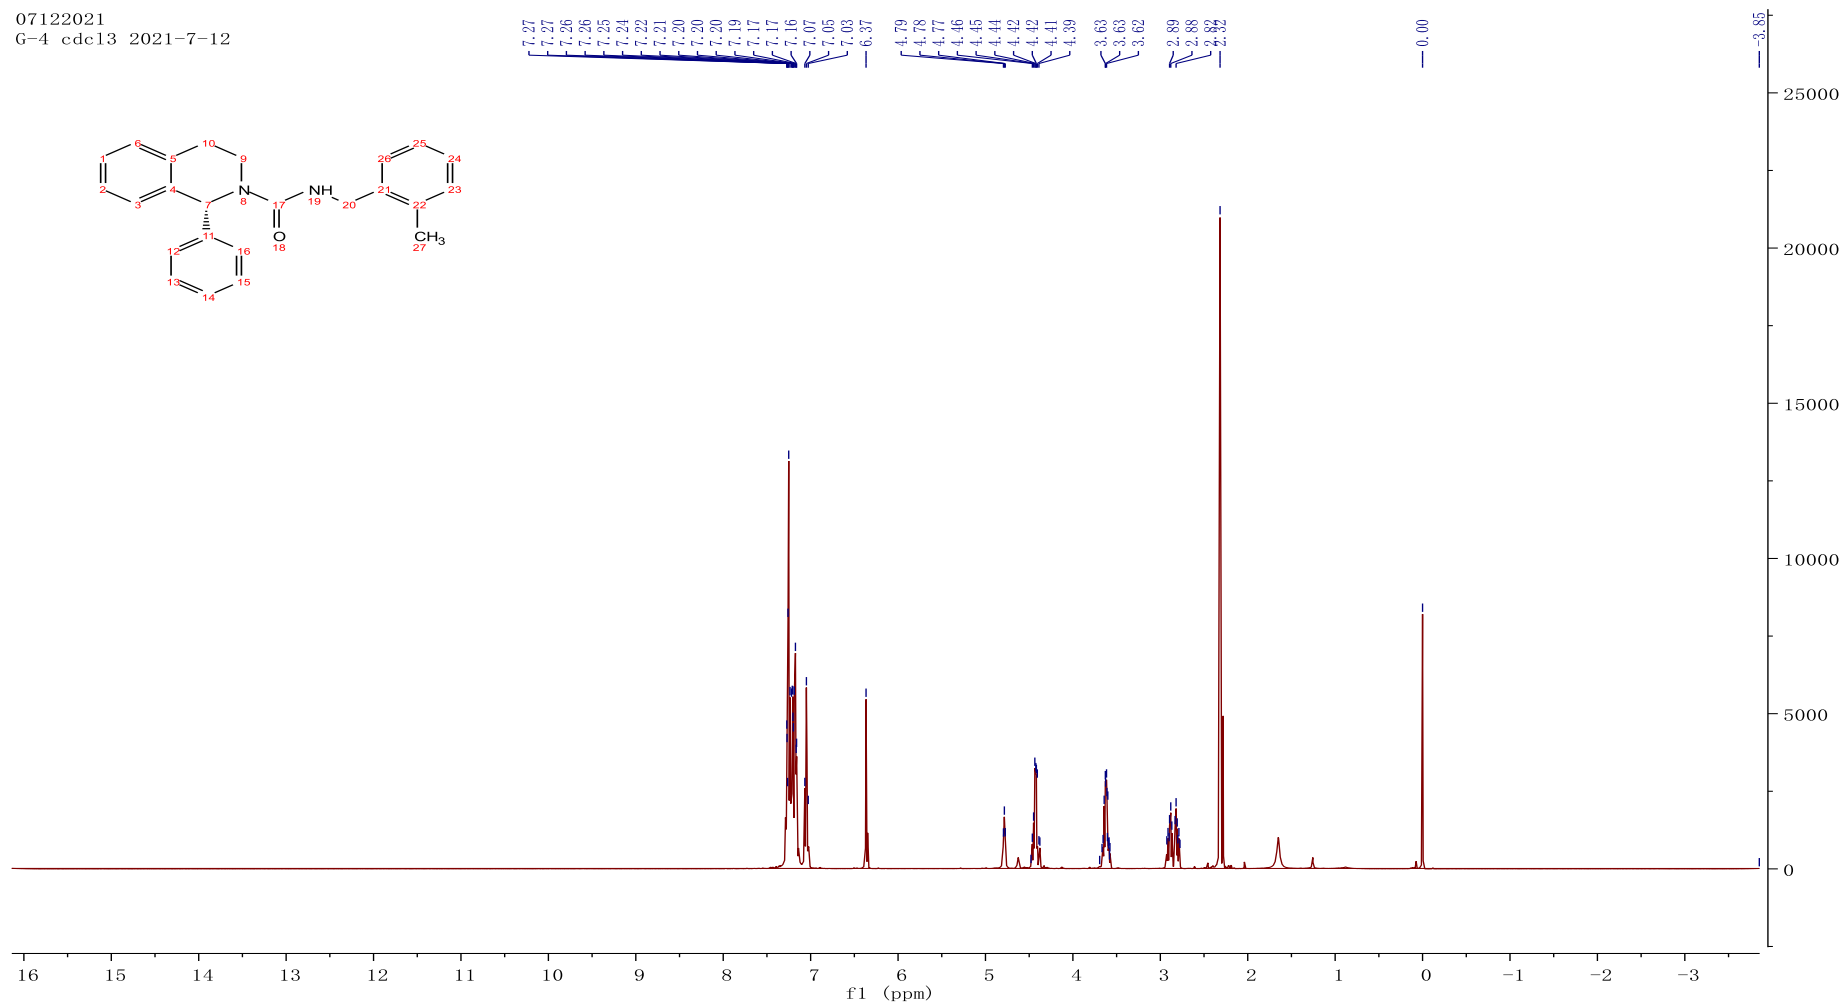

$^1\text{H}$ -NMR Spectral of **2p**

07122021  
G-4 cdc13 2021-7-12

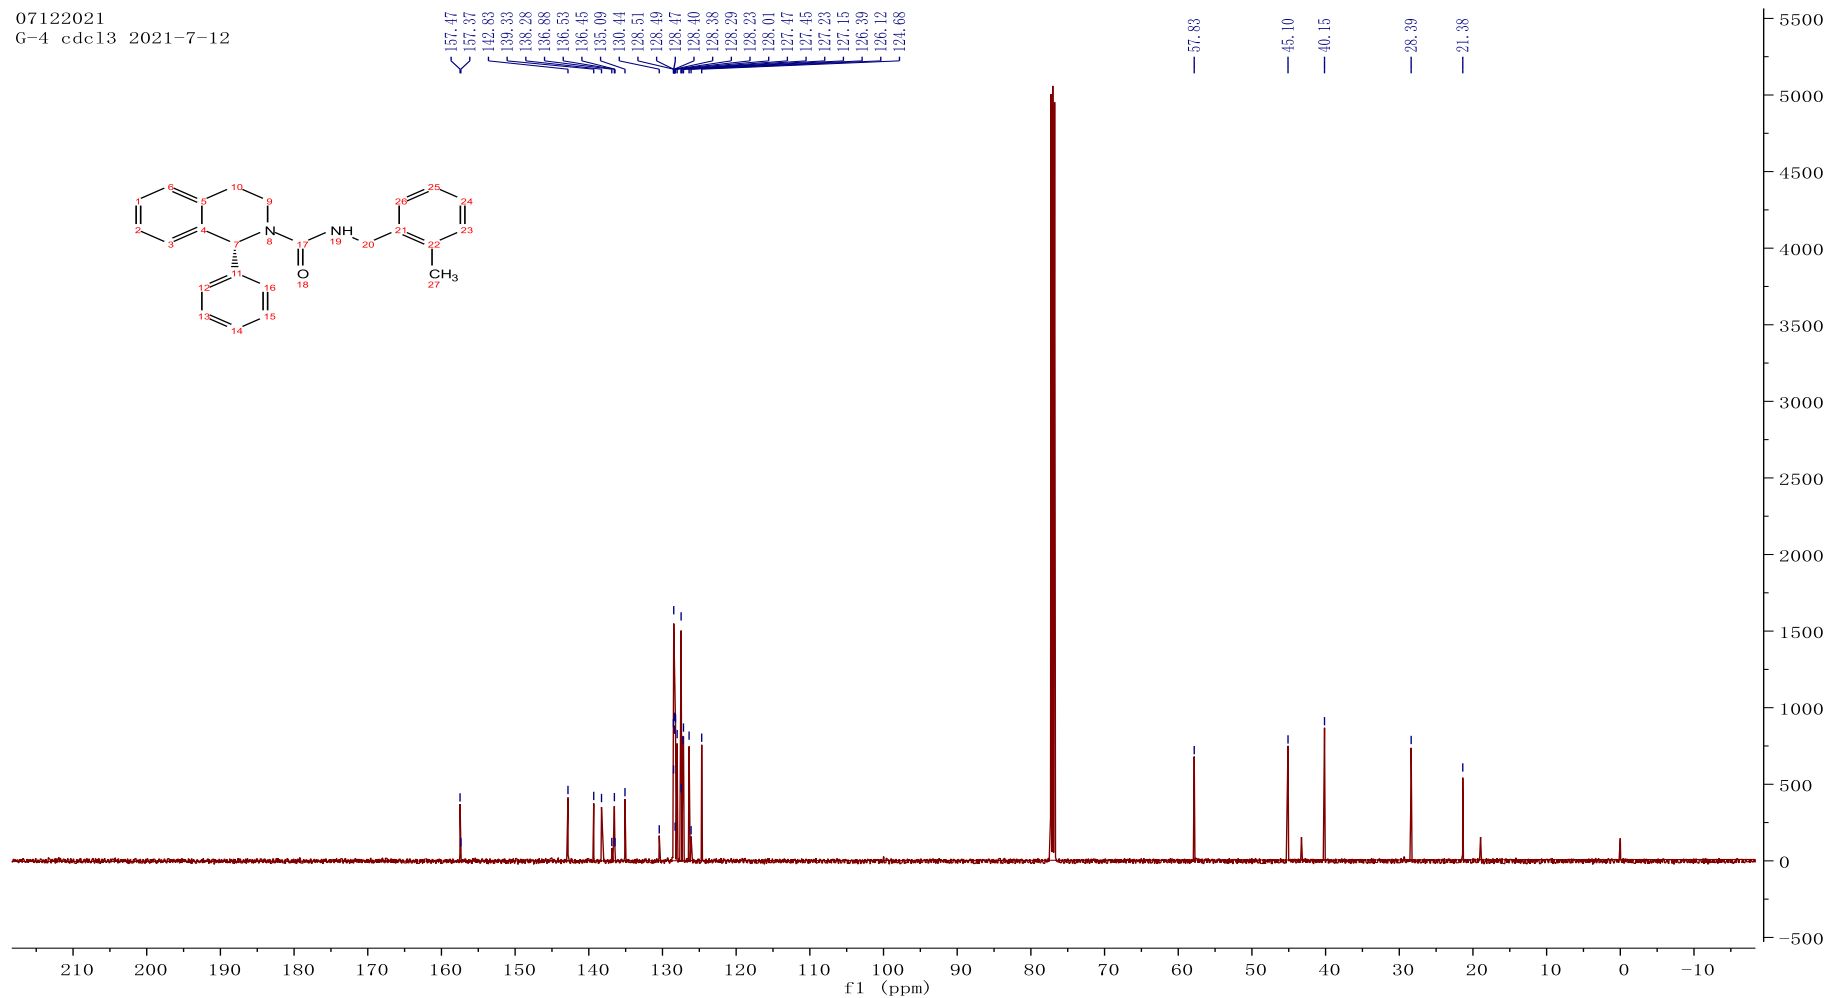

<sup>13</sup>C-NMR Spectral of **2p**



07122021  
G-5 cdc13 2021-7-12

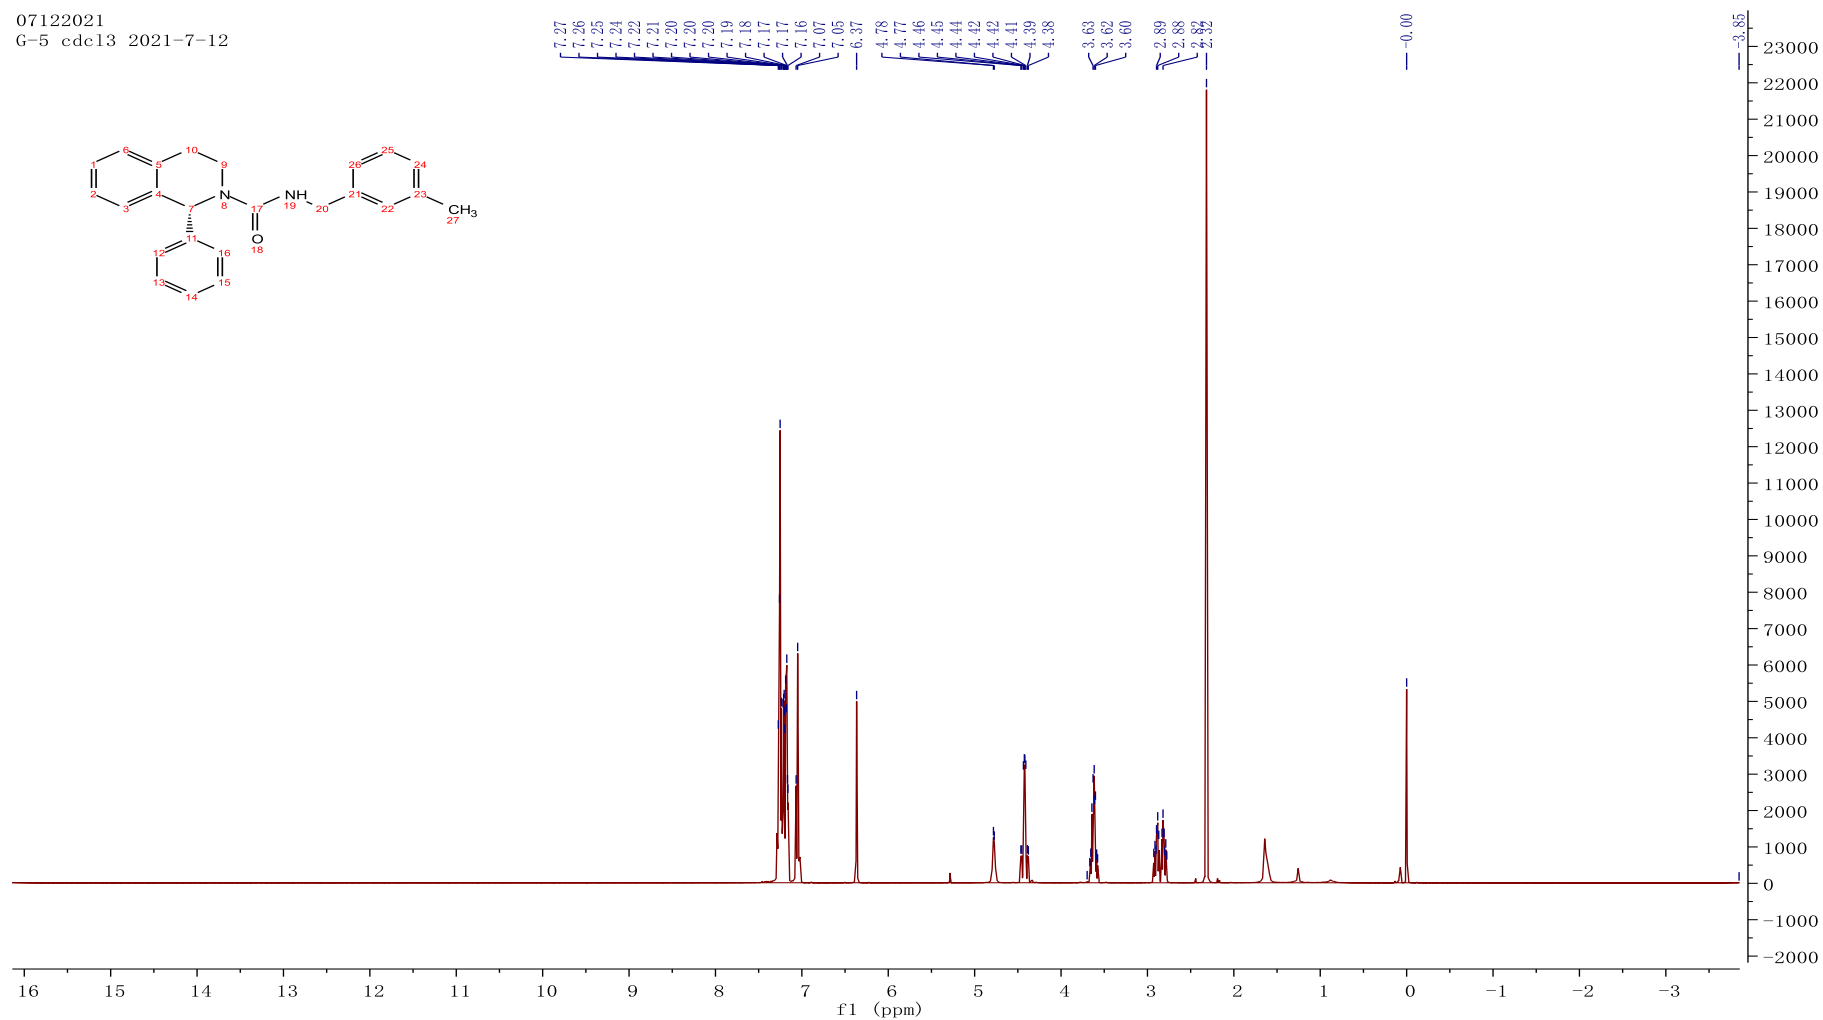

<sup>1</sup>H-NMR Spectral of **2q**

07122021  
G-5 cdc13 2021-7-12

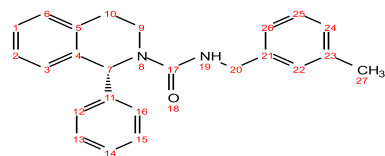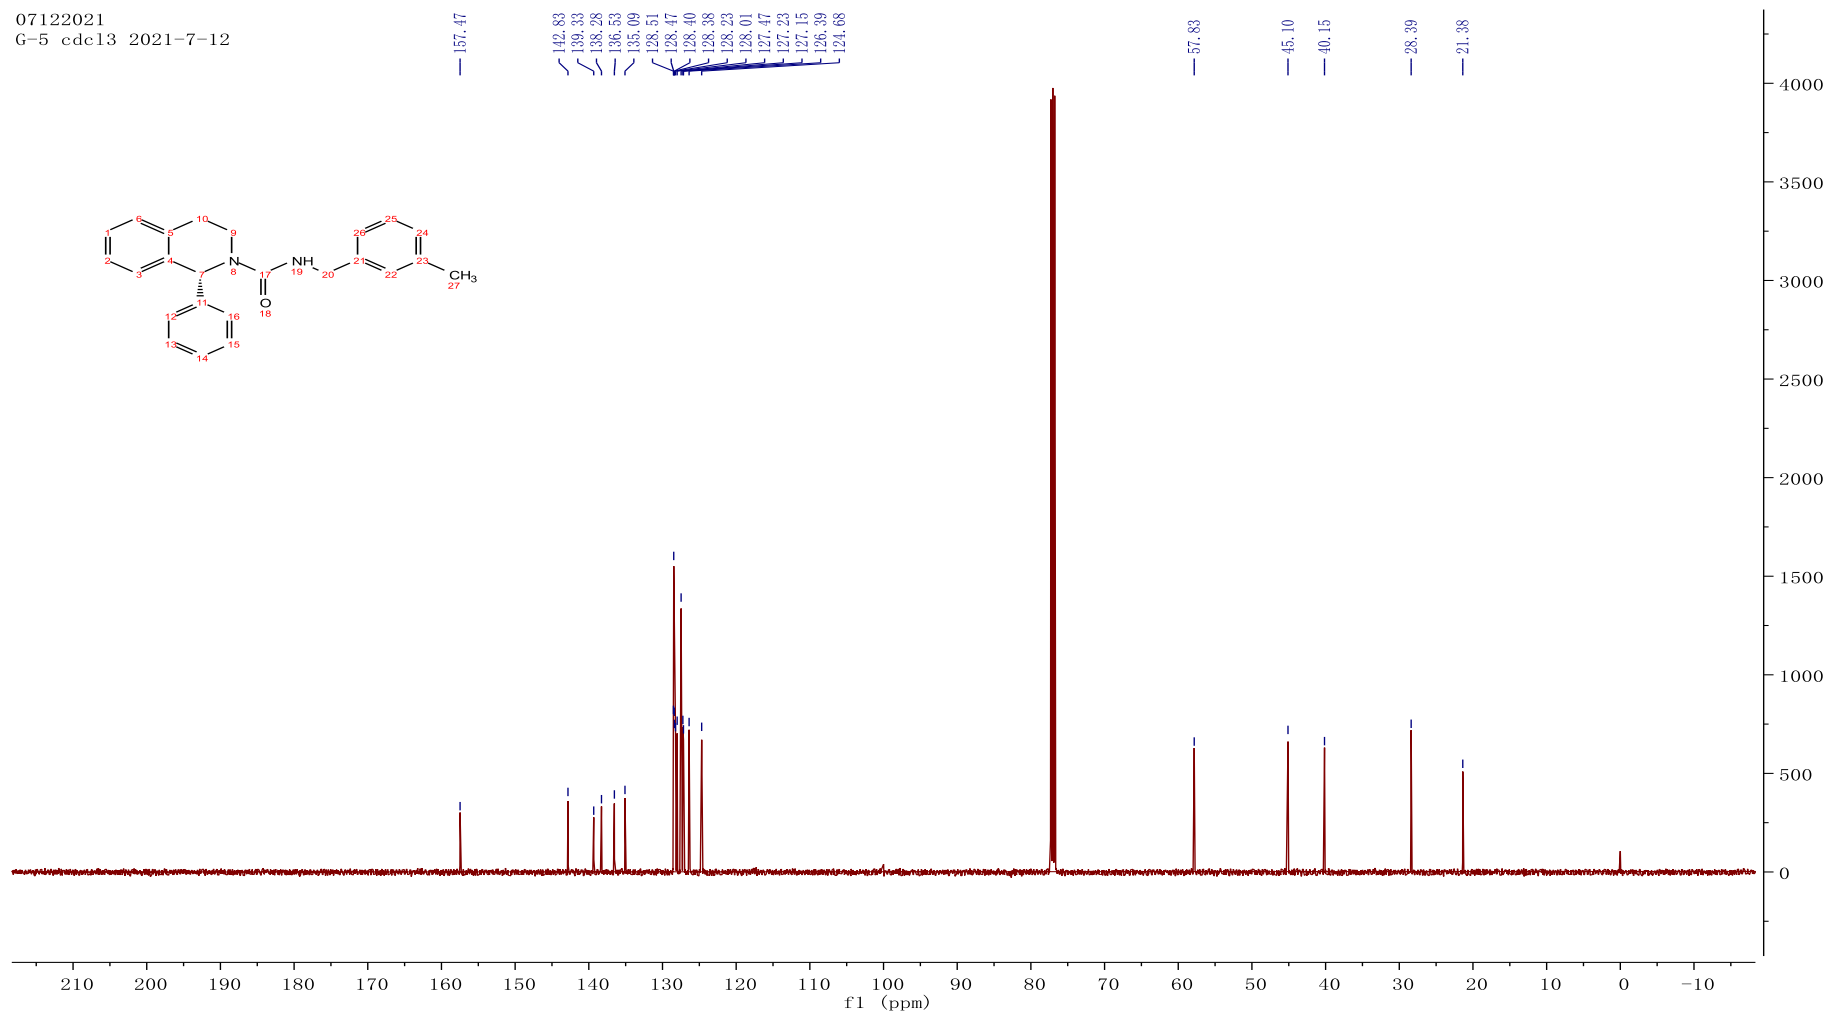

<sup>13</sup>C-NMR Spectral of 2q

07/12/2021  
G-6 cdc13 2021-7-12

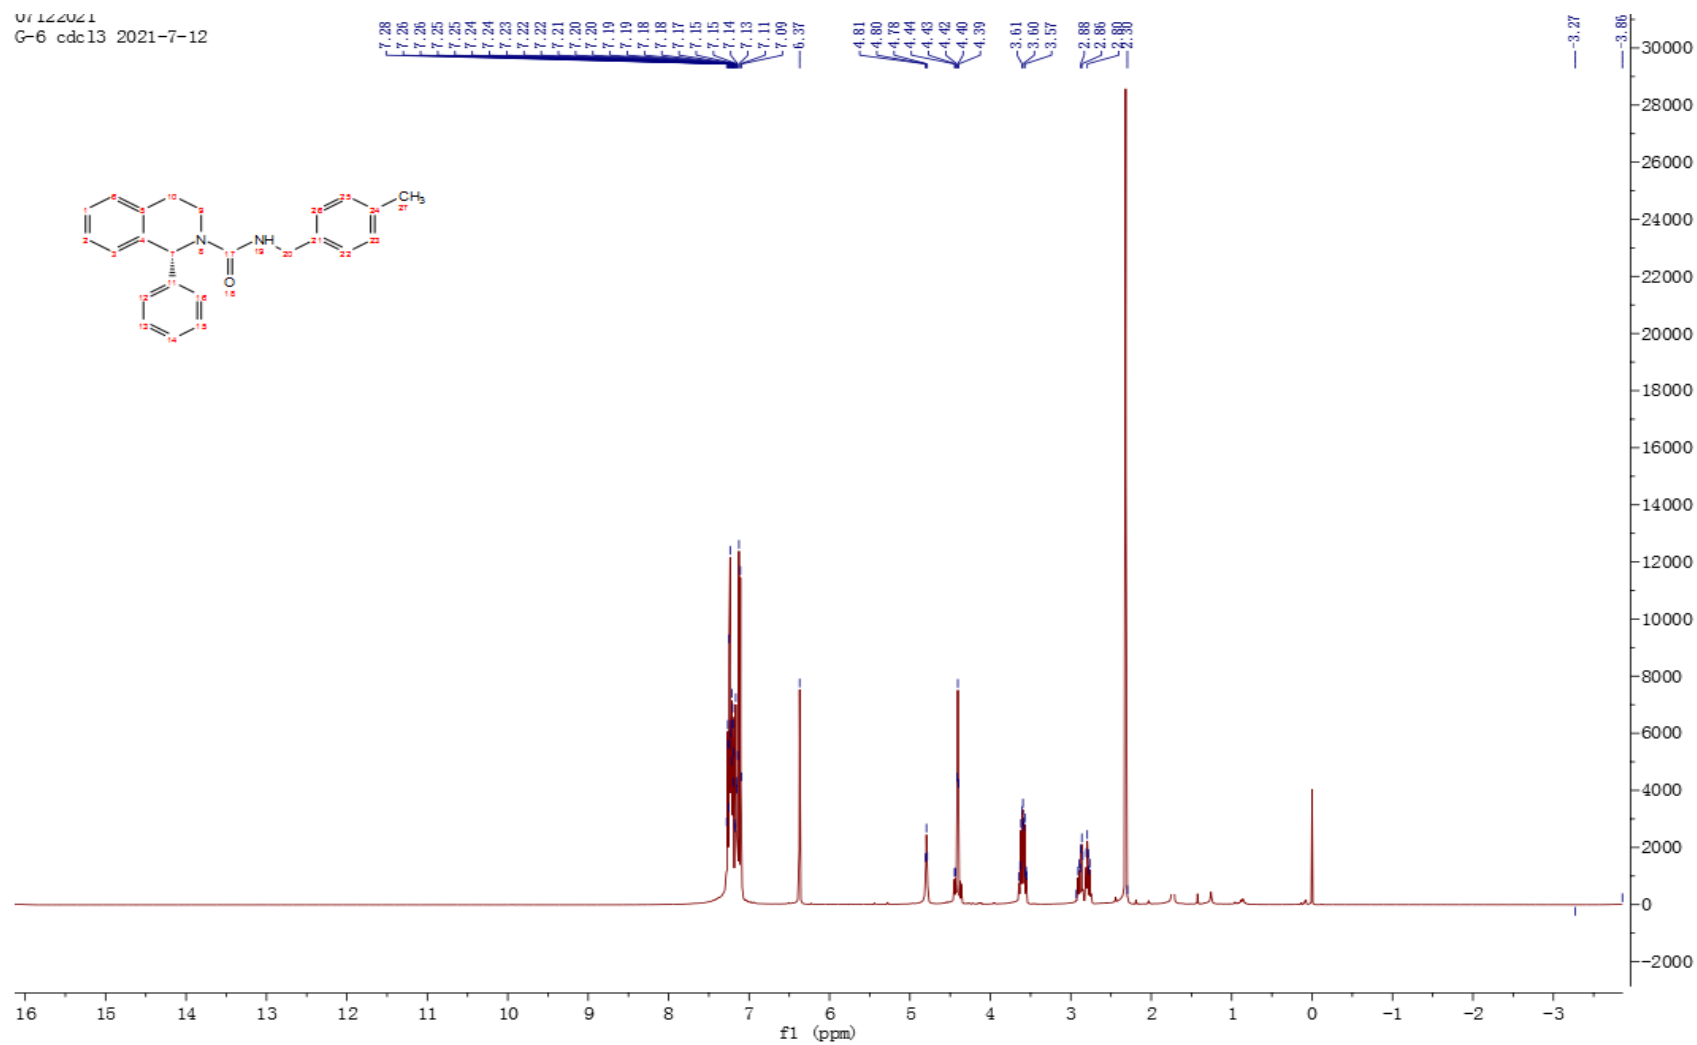

<sup>1</sup>H-NMR Spectral of **2r**

07122021  
G-6 cdc13 2021-7-12

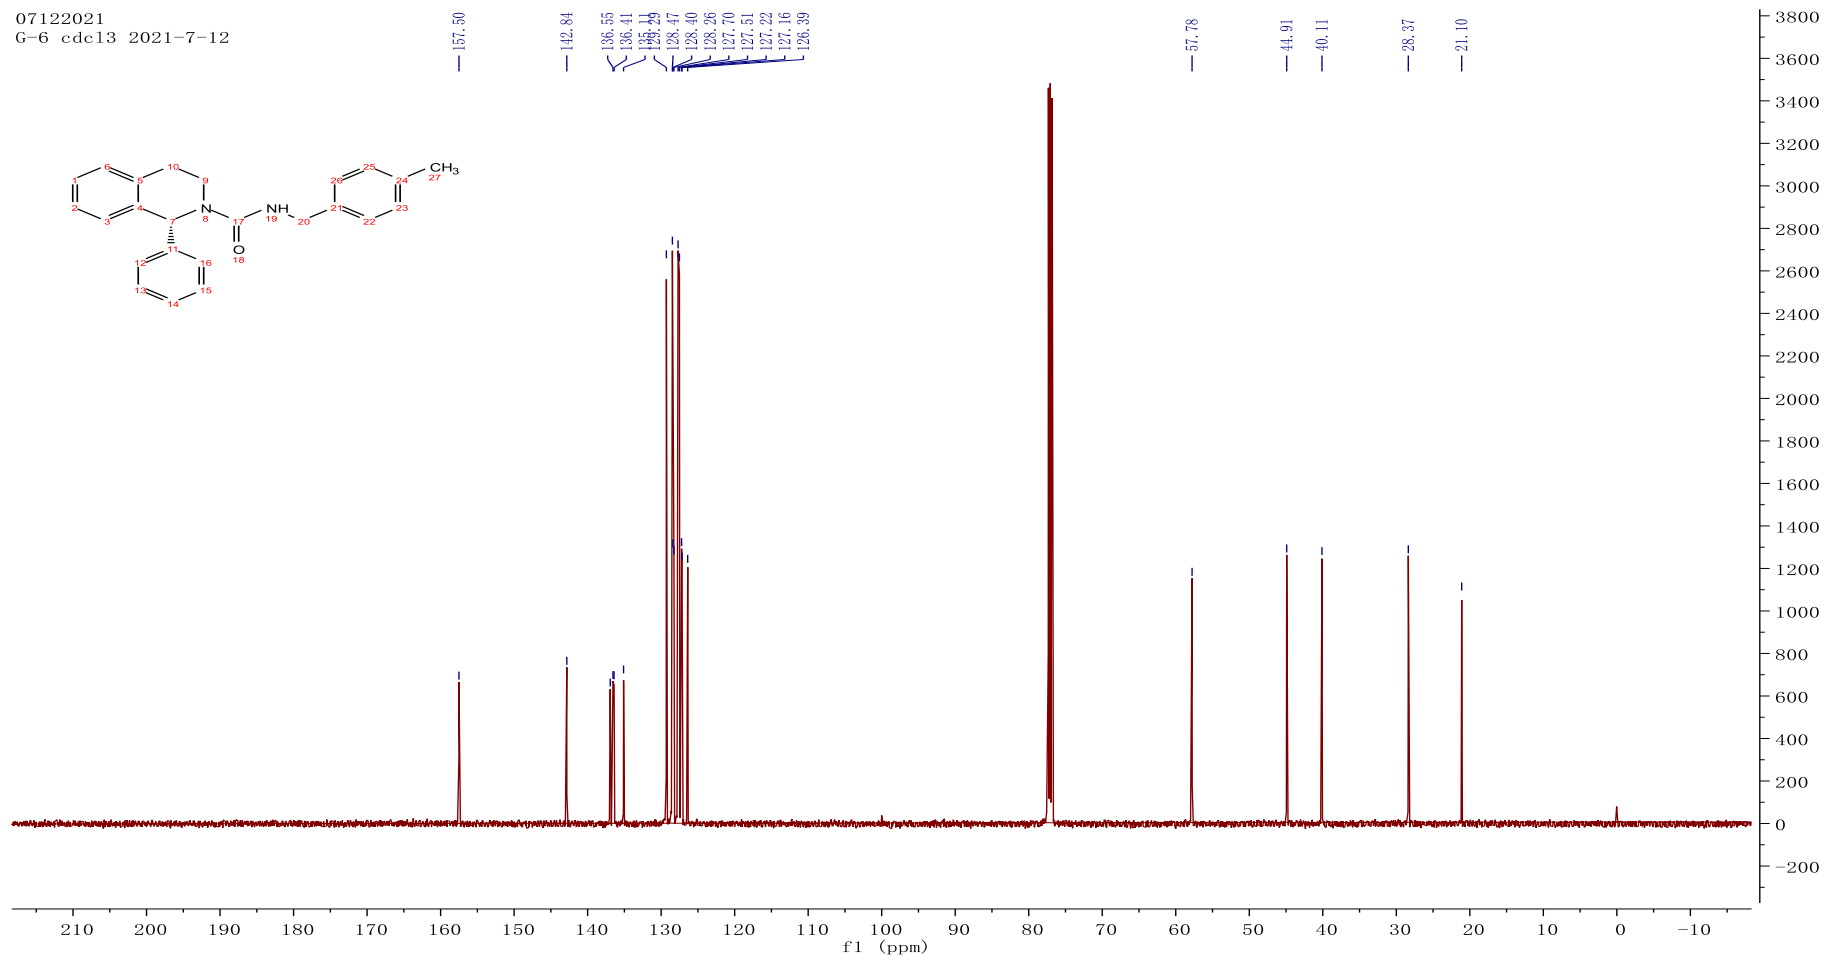

$^{13}\text{C}$ -NMR Spectral of **2r**

G2 G3 G5 H CNMR  
300 20210404 cdc13 G

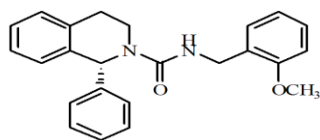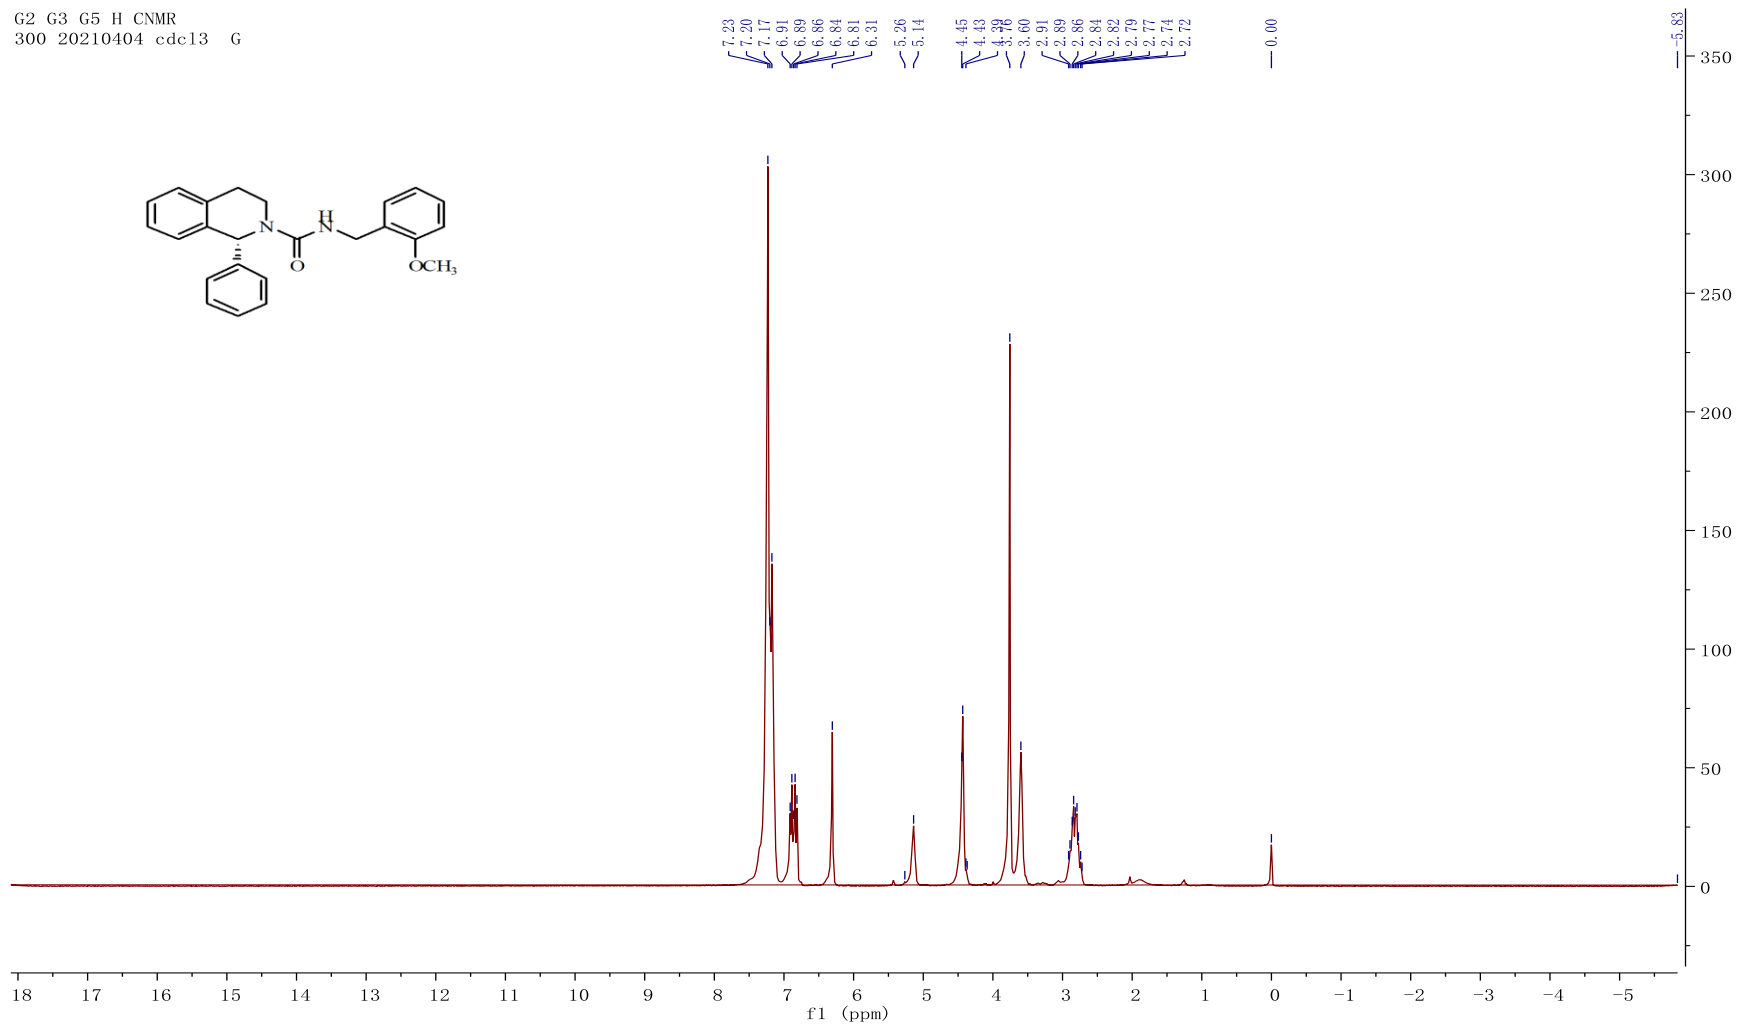

<sup>1</sup>H-NMR Spectral of **2s**

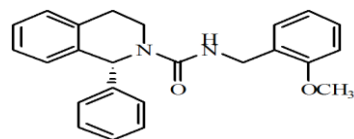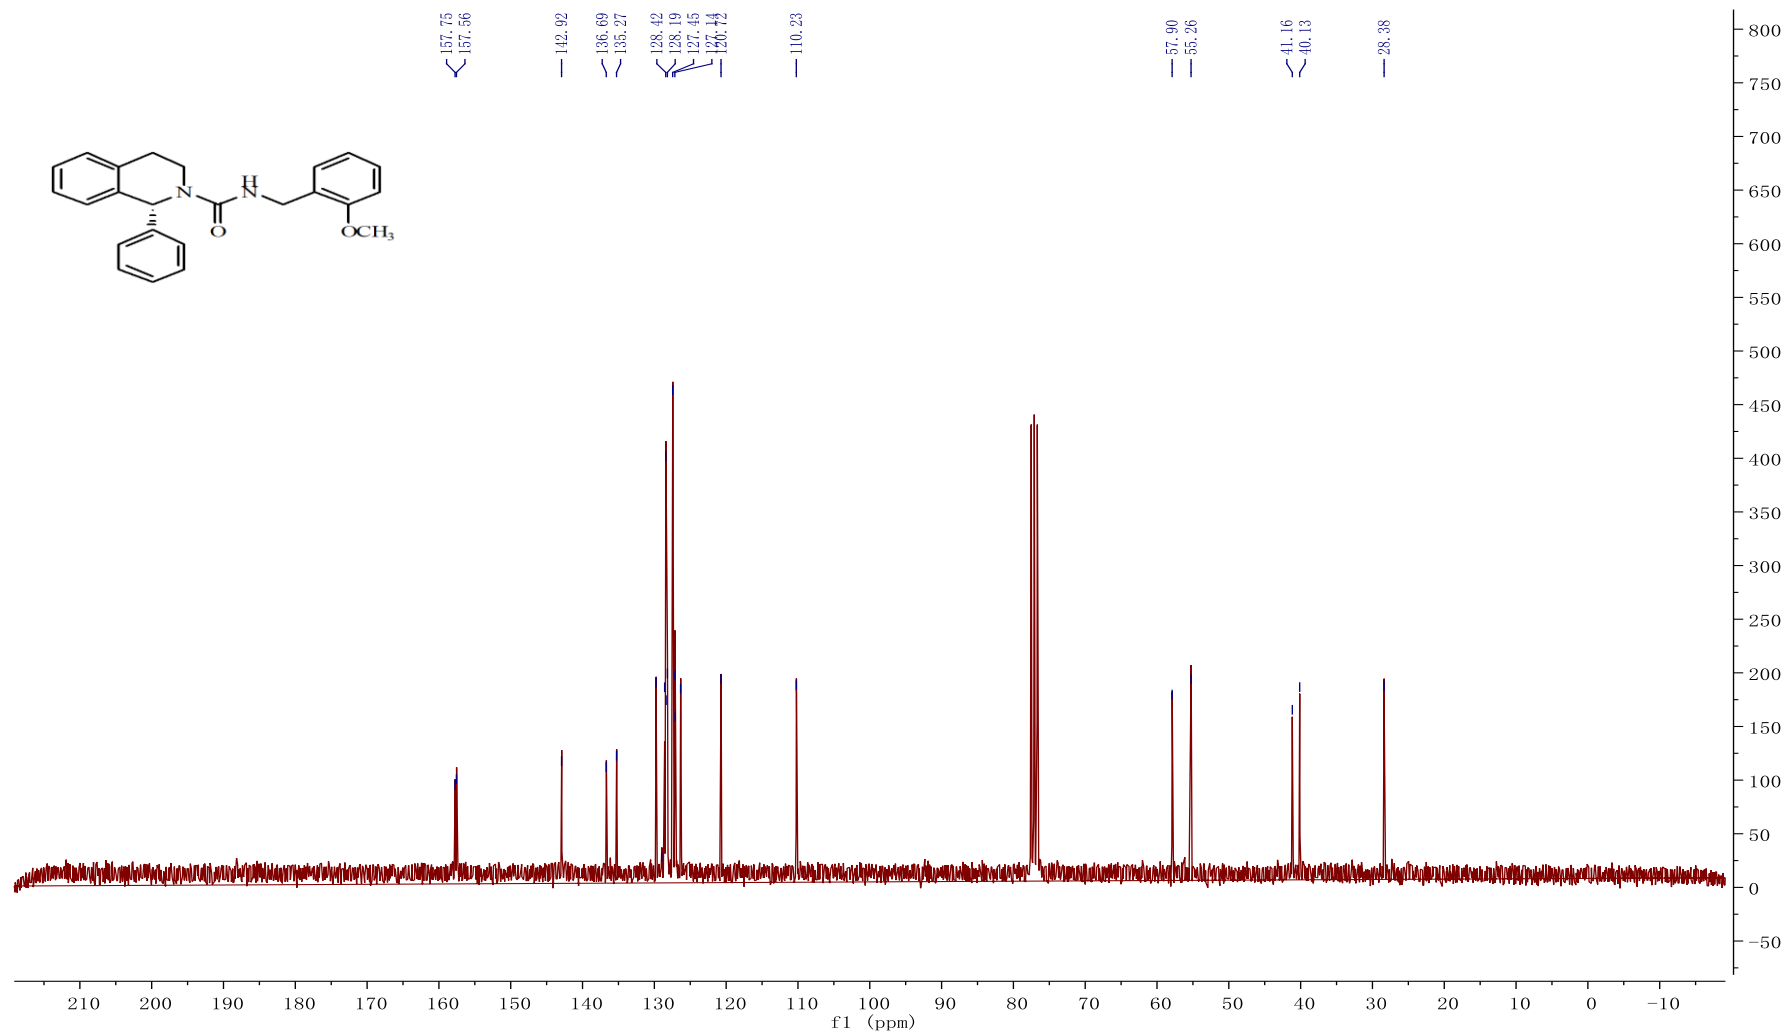

<sup>13</sup>C-NMR Spectral of **2s**

07122021  
G-7 cdc13 2021-7-12

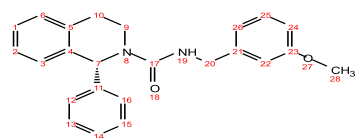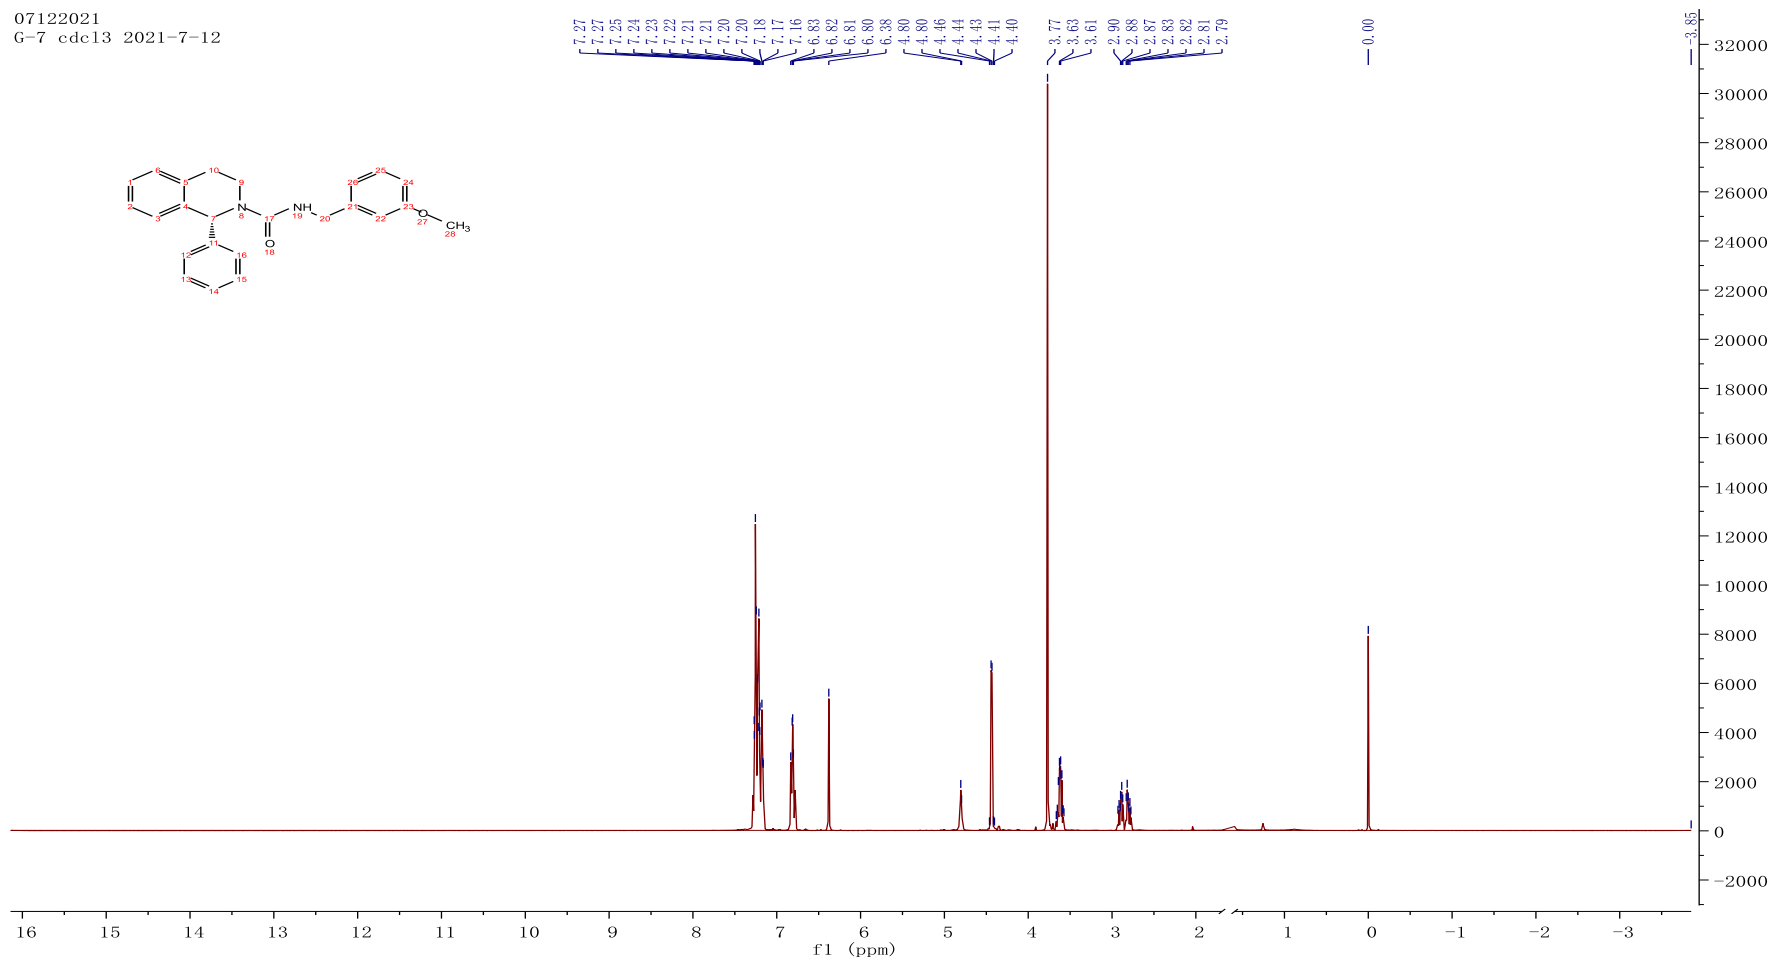<sup>1</sup>H-NMR Spectral of **2t**

07122021  
G-7 cdc13 2021-7-12

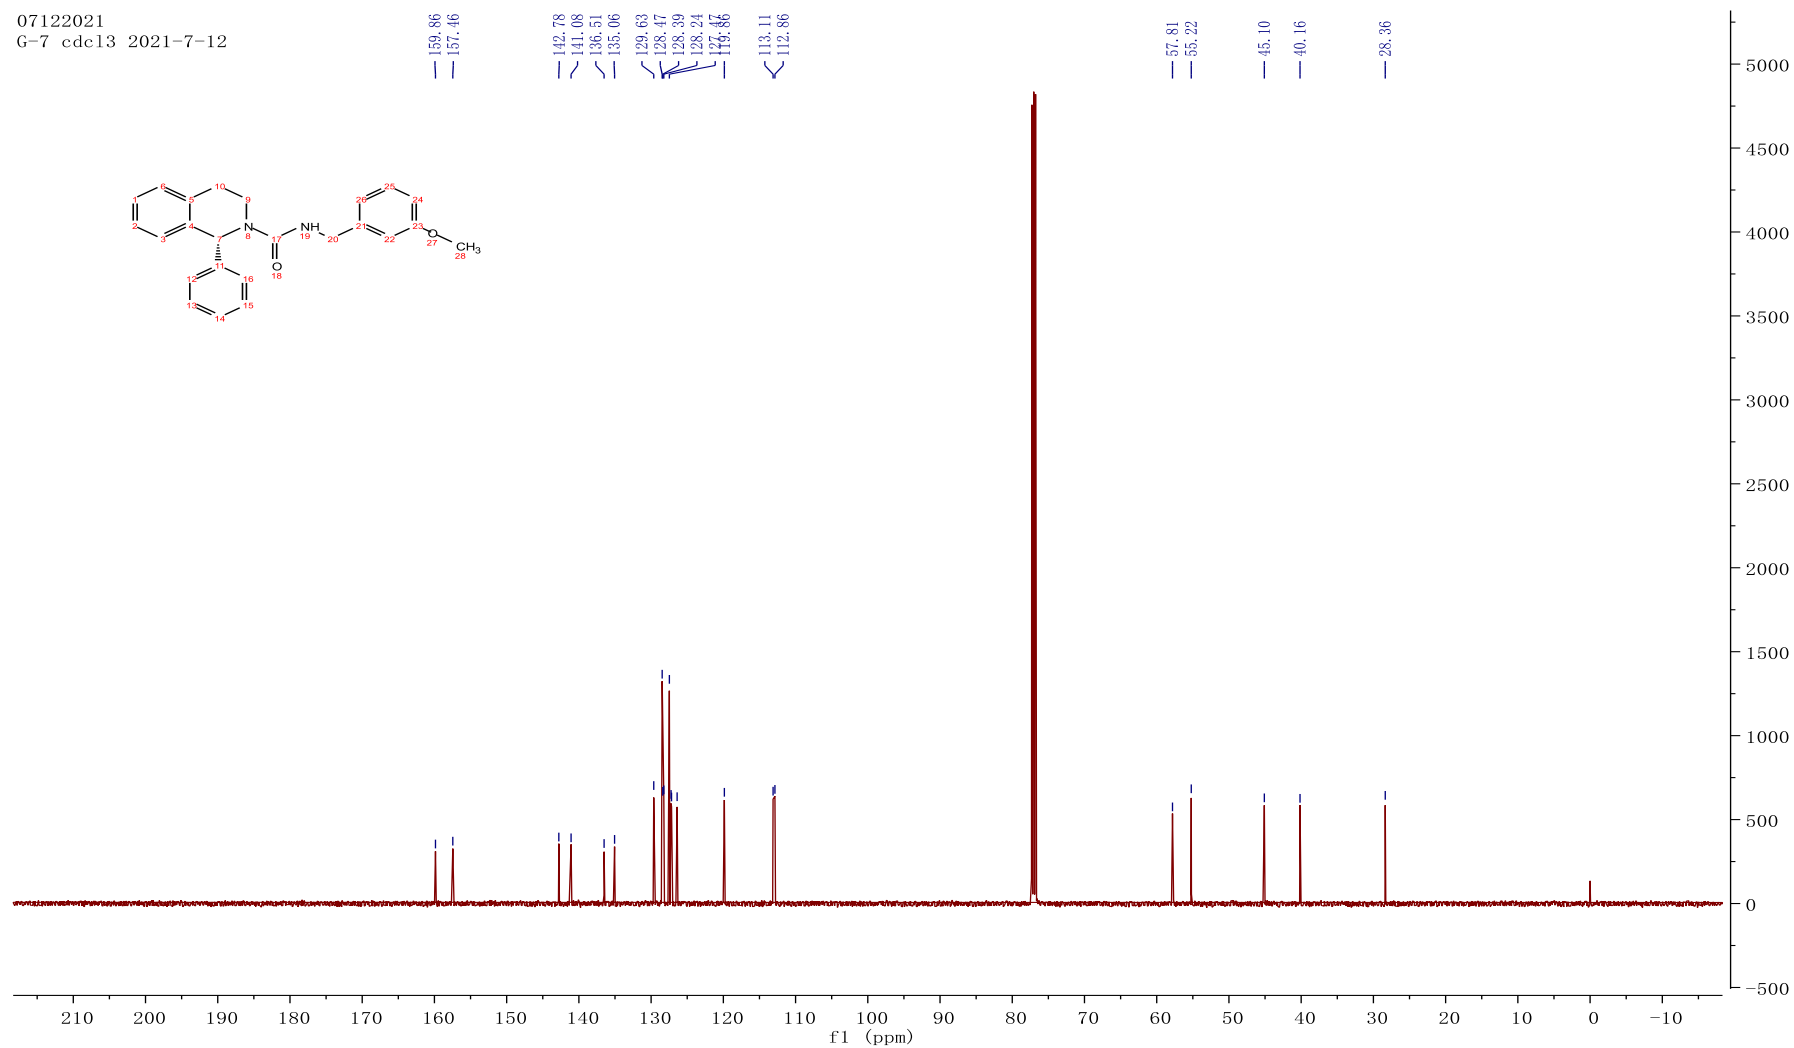

<sup>13</sup>C-NMR Spectral of **2t**



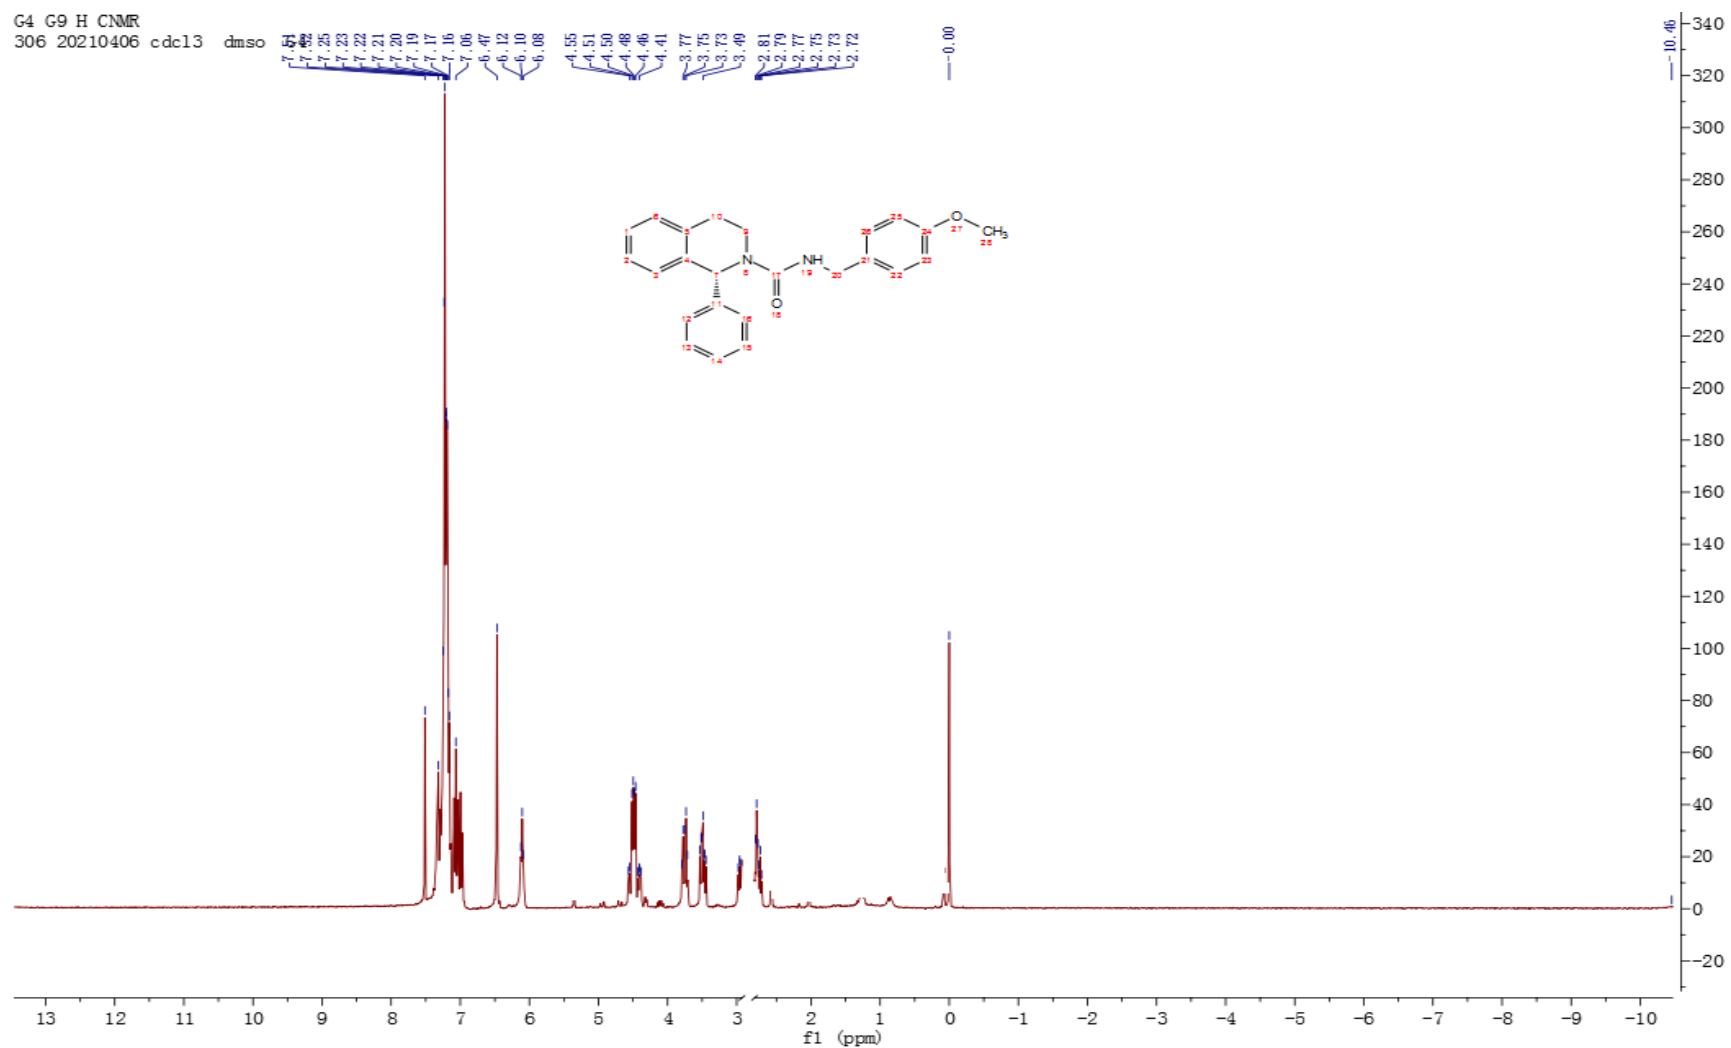

<sup>1</sup>H-NMR Spectral of **2u**

G4 G9 H CNMR  
286 20210406 cdc13 dms0 G-

167.02  
163.78  
162.33  
147.70  
141.19  
139.97  
133.26  
132.96  
132.42  
131.79  
131.75  
130.87  
119.59  
115.31

61.93  
45.68  
45.40  
45.12  
44.84  
44.57  
44.29  
44.11  
43.15  
32.96

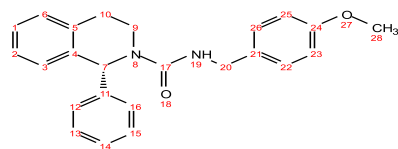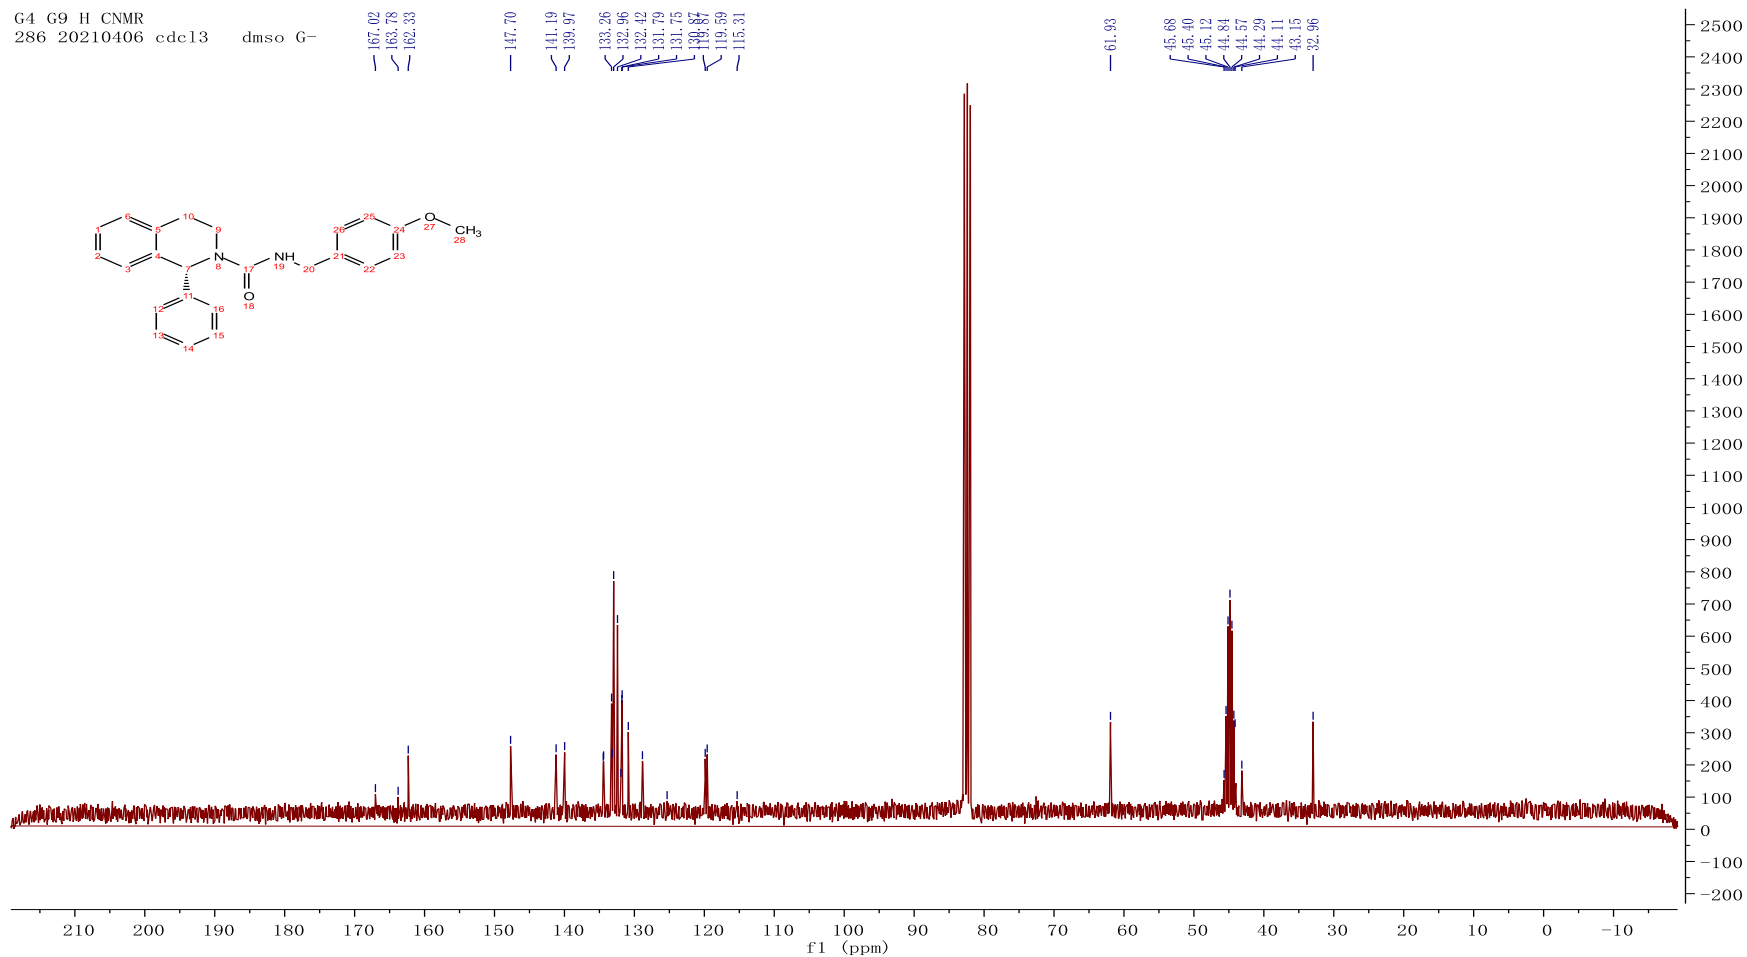

<sup>13</sup>C-NMR Spectral of **2u**

07122021  
G-8 cdc13 2021-7-12

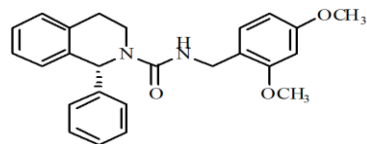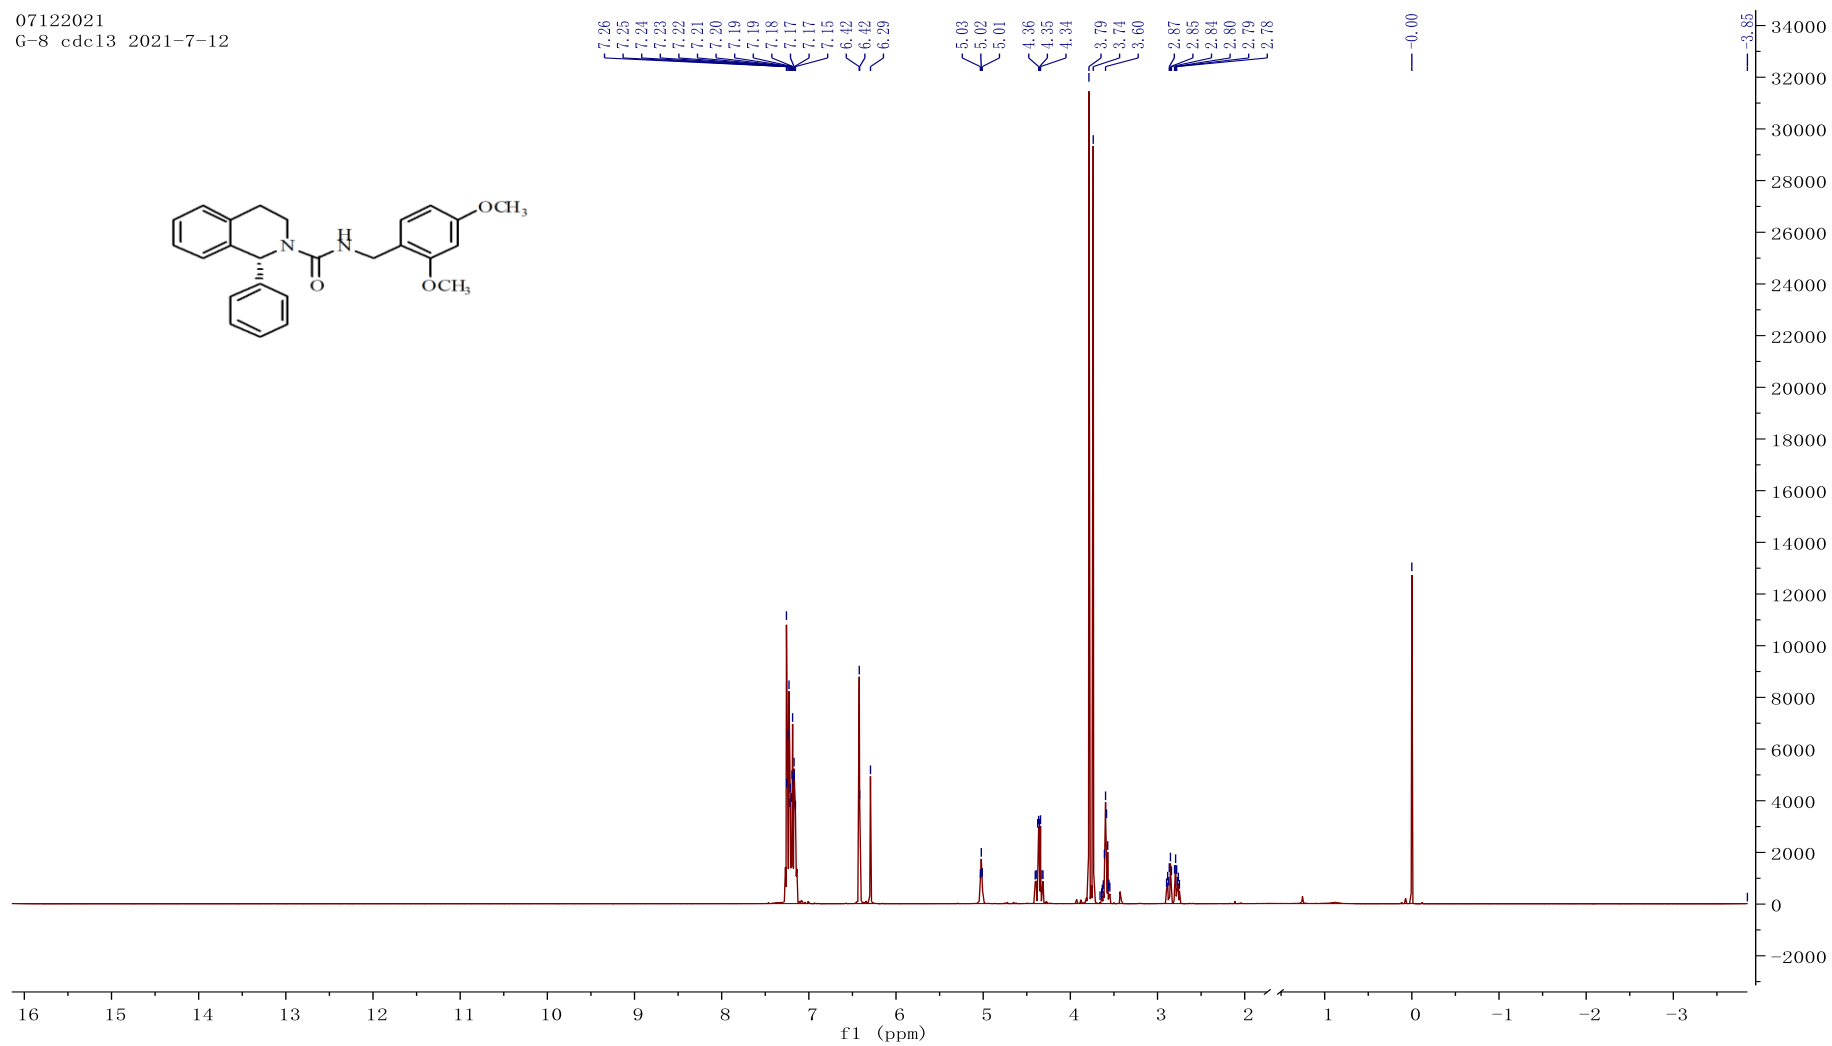

<sup>1</sup>H-NMR Spectral of **2v**

07122021  
G-8 cdc13 2021-7-12

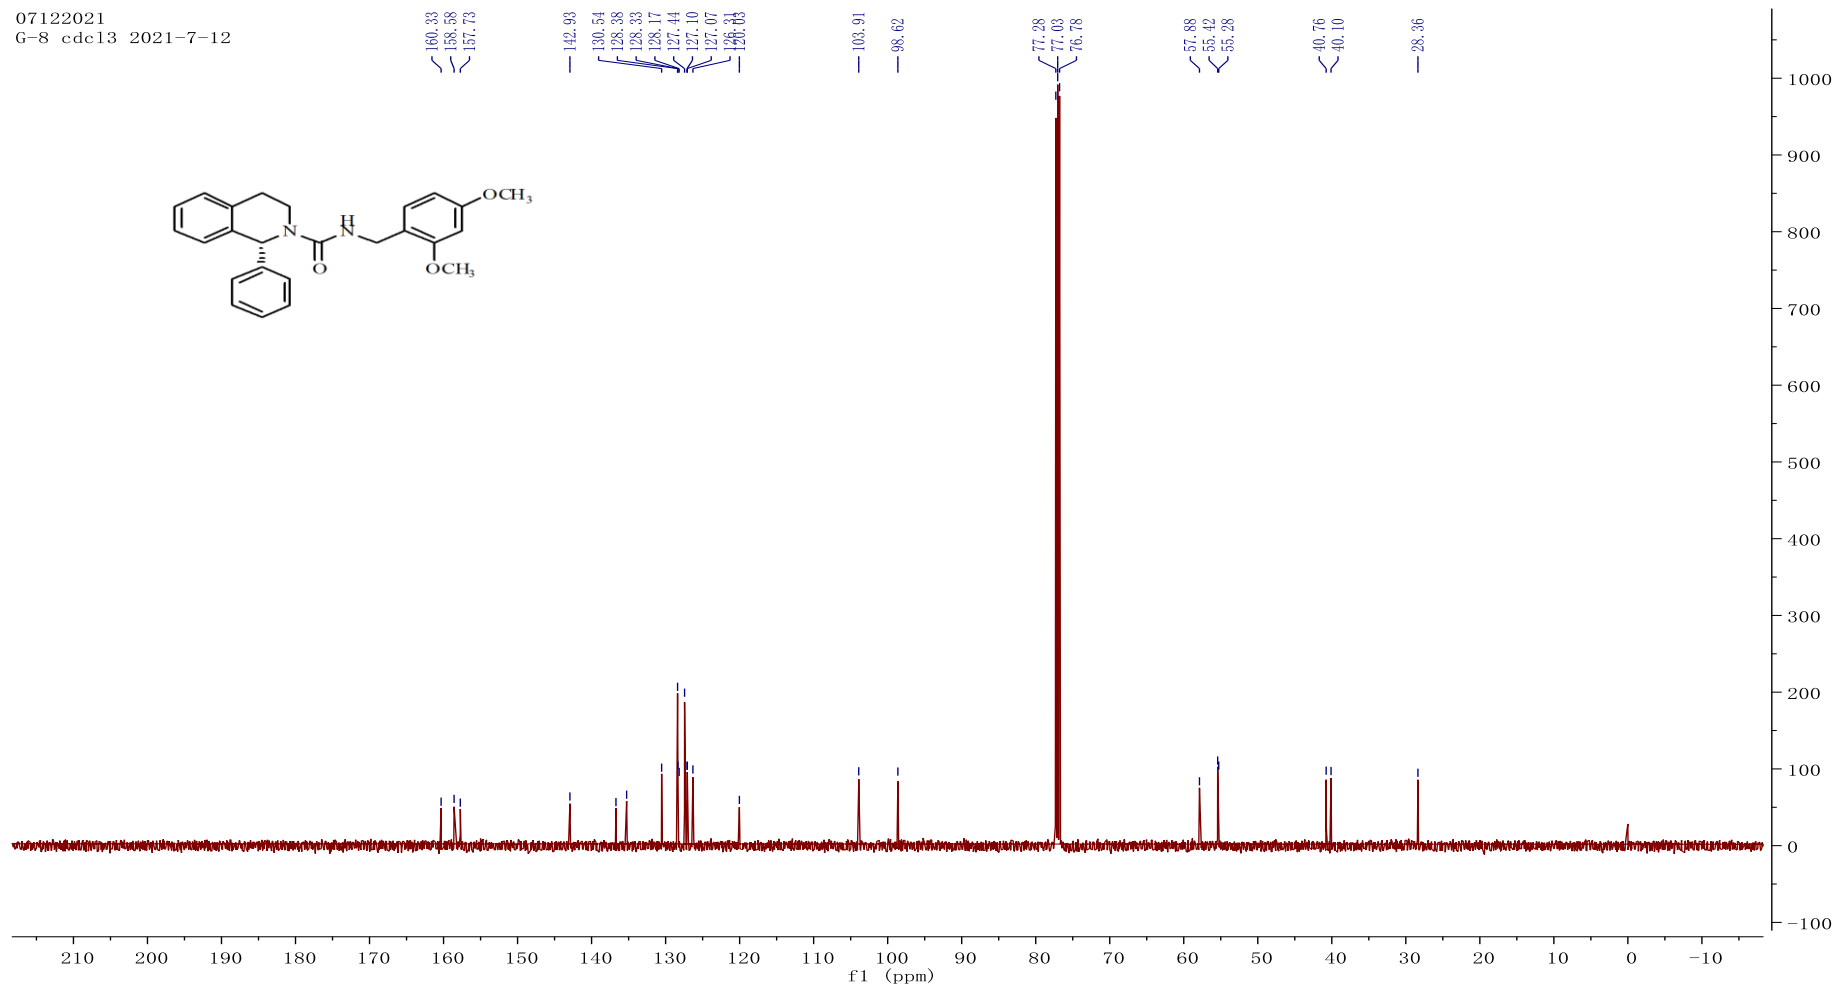

<sup>13</sup>C-NMR Spectral of **2v**

10072021  
G-12 cdc13 2021-10-7

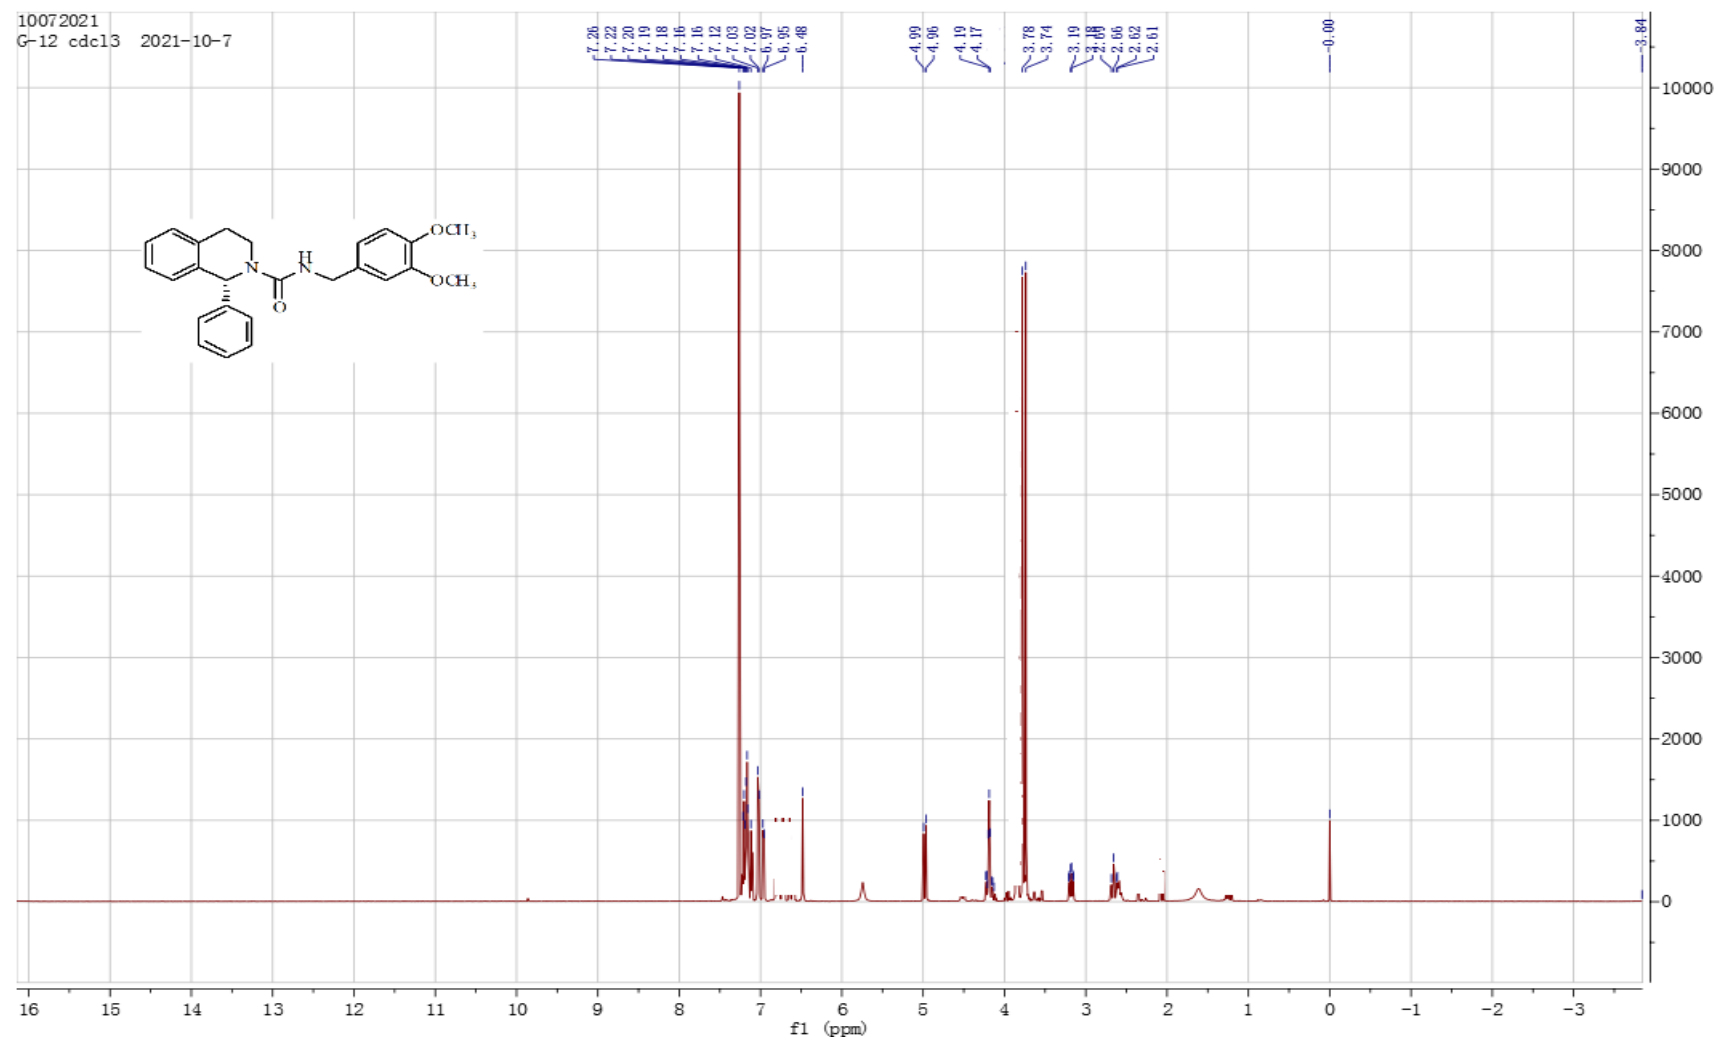

<sup>1</sup>H-NMR Spectral of 2w

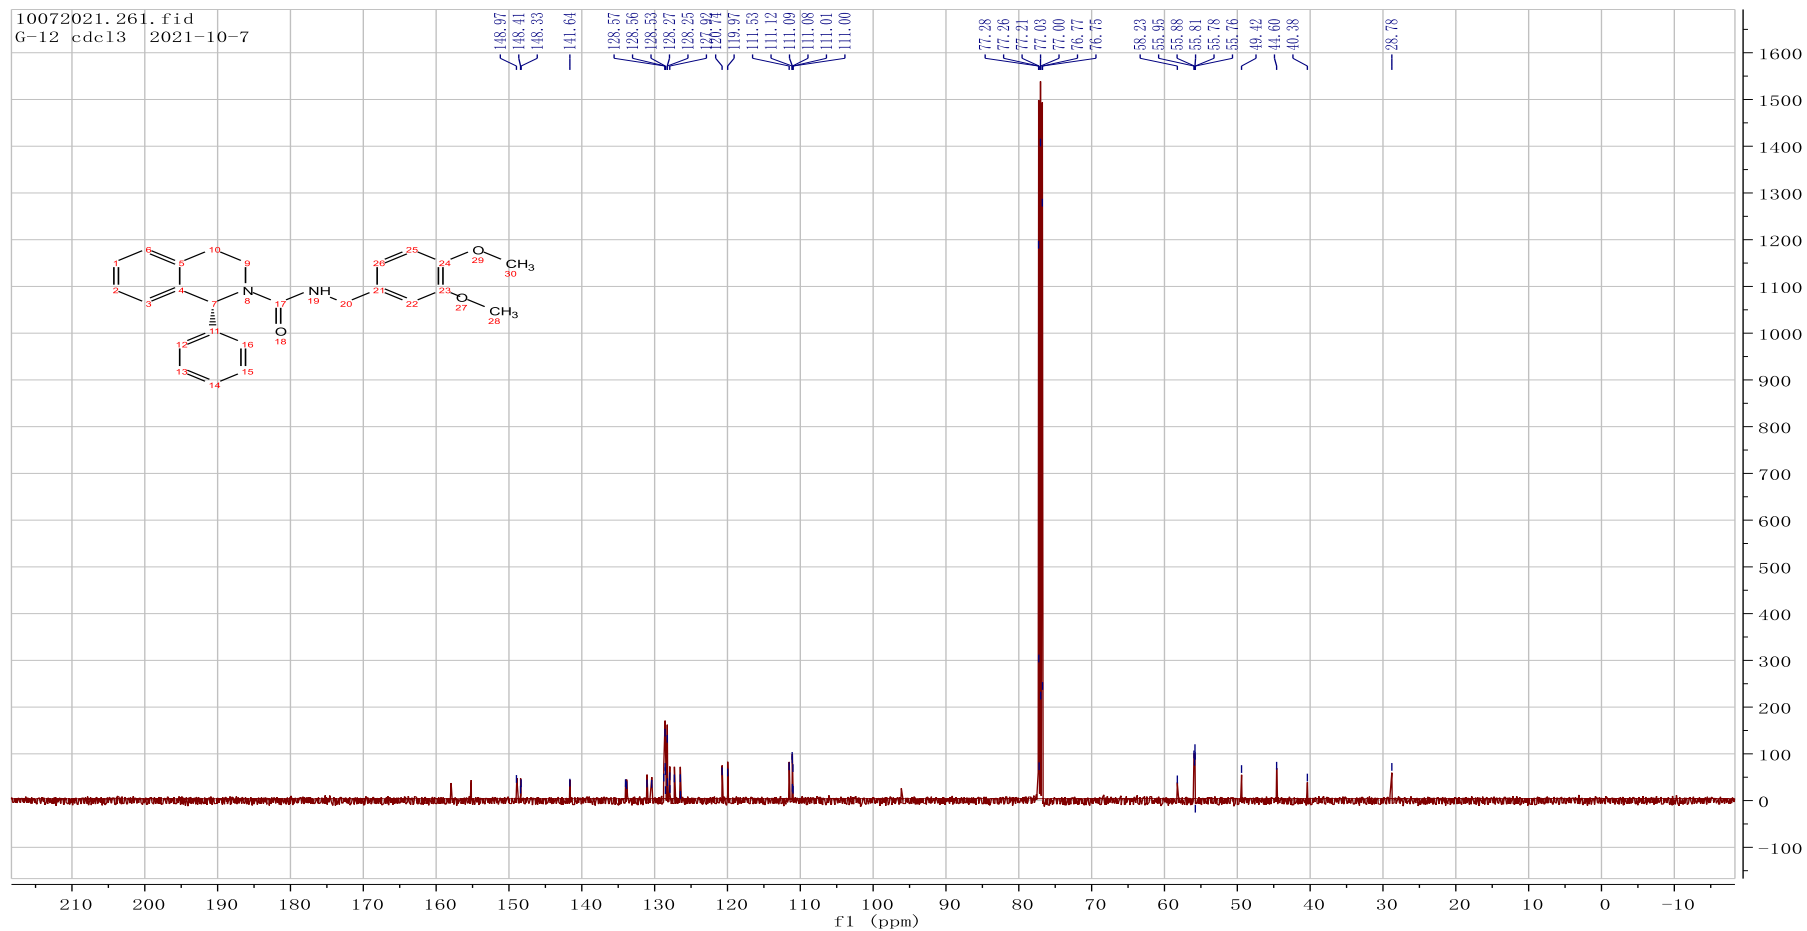

$^{13}\text{C}$ -NMR Spectral of 2w

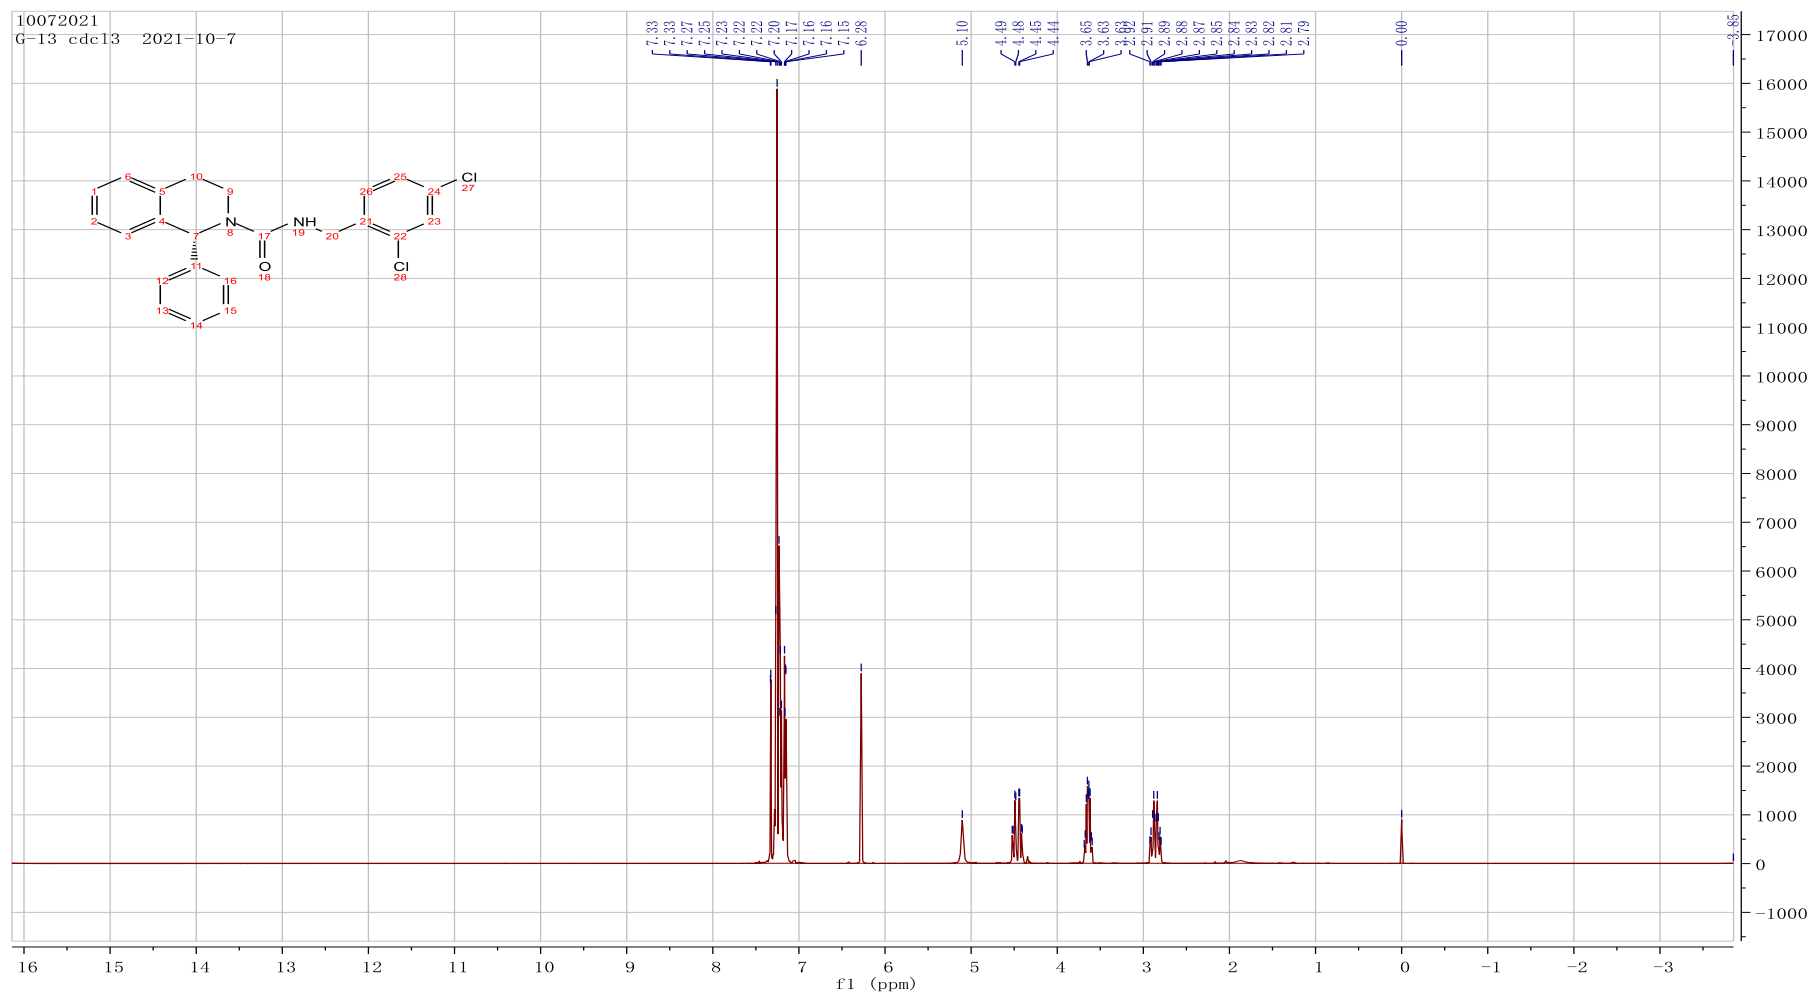

<sup>1</sup>H-NMR Spectral of **2x**

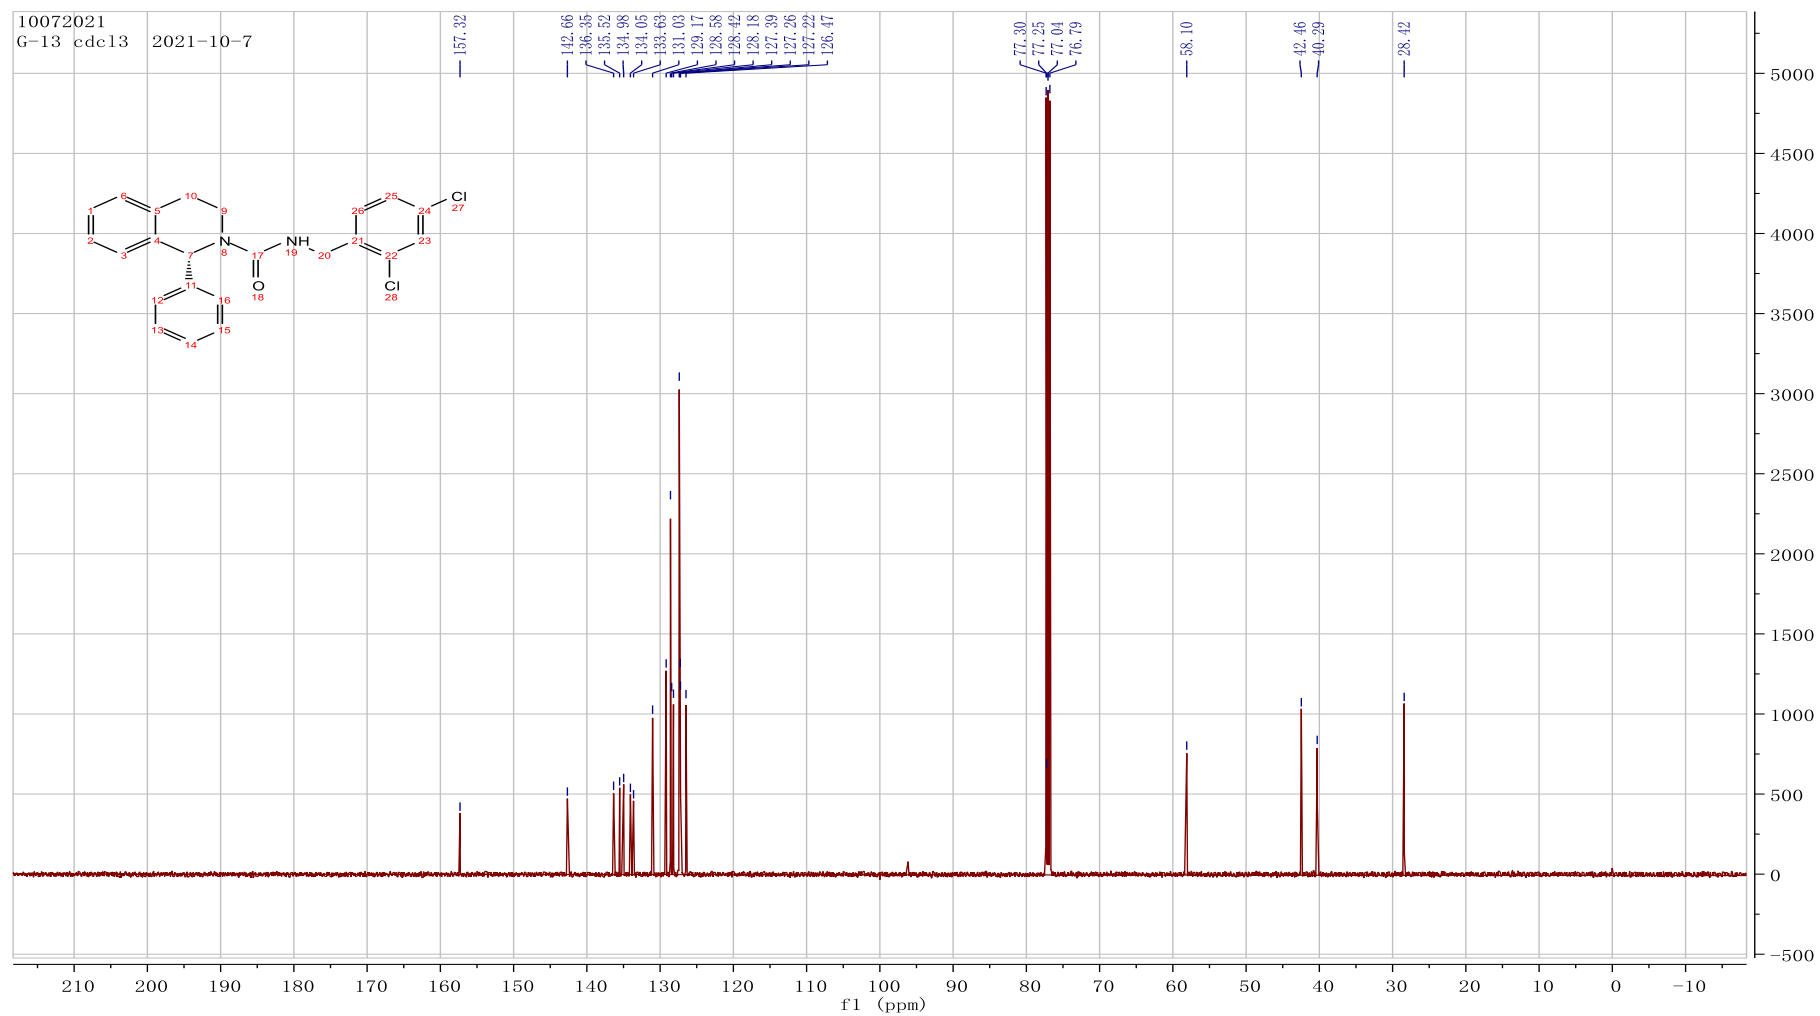

$^{13}\text{C}$ -NMR Spectral of **2x**



10072021  
G-14 cdc13 2021-10-7

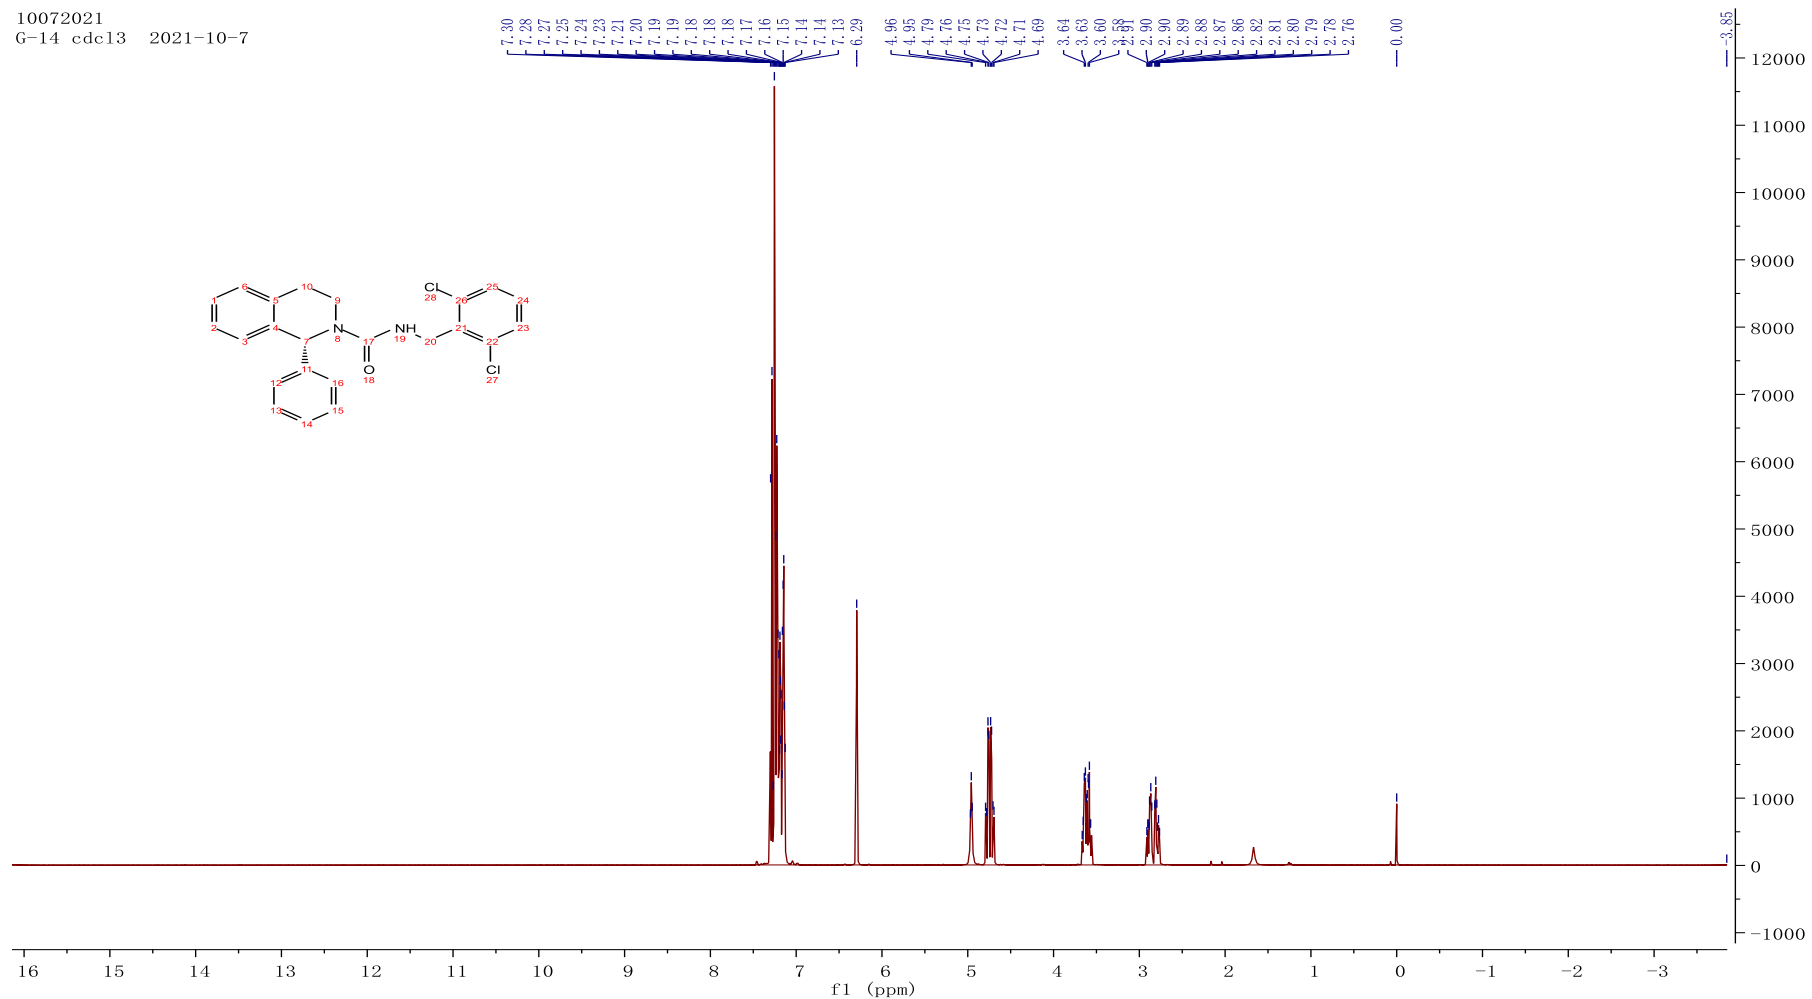

<sup>1</sup>H-NMR Spectral of **2y**

10072021  
G-14 cdc13 2021-10-7

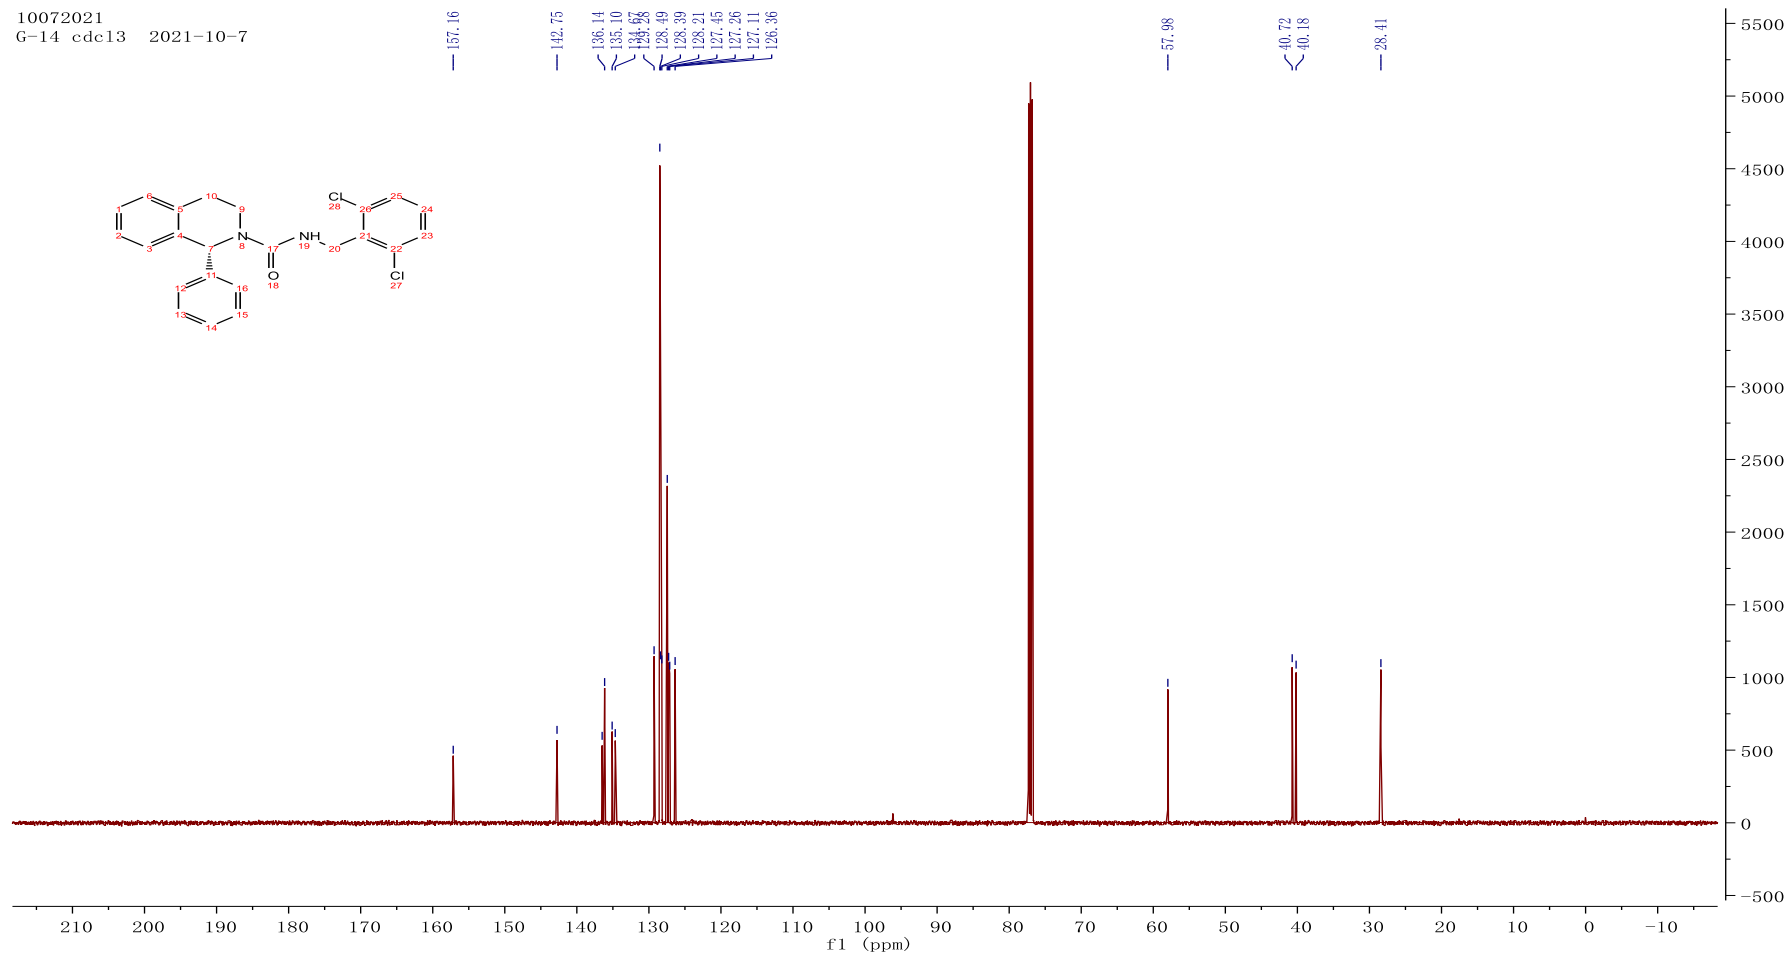

<sup>13</sup>C-NMR Spectral of **2y**

10072021  
G-15 cdcl3 2021-10-7

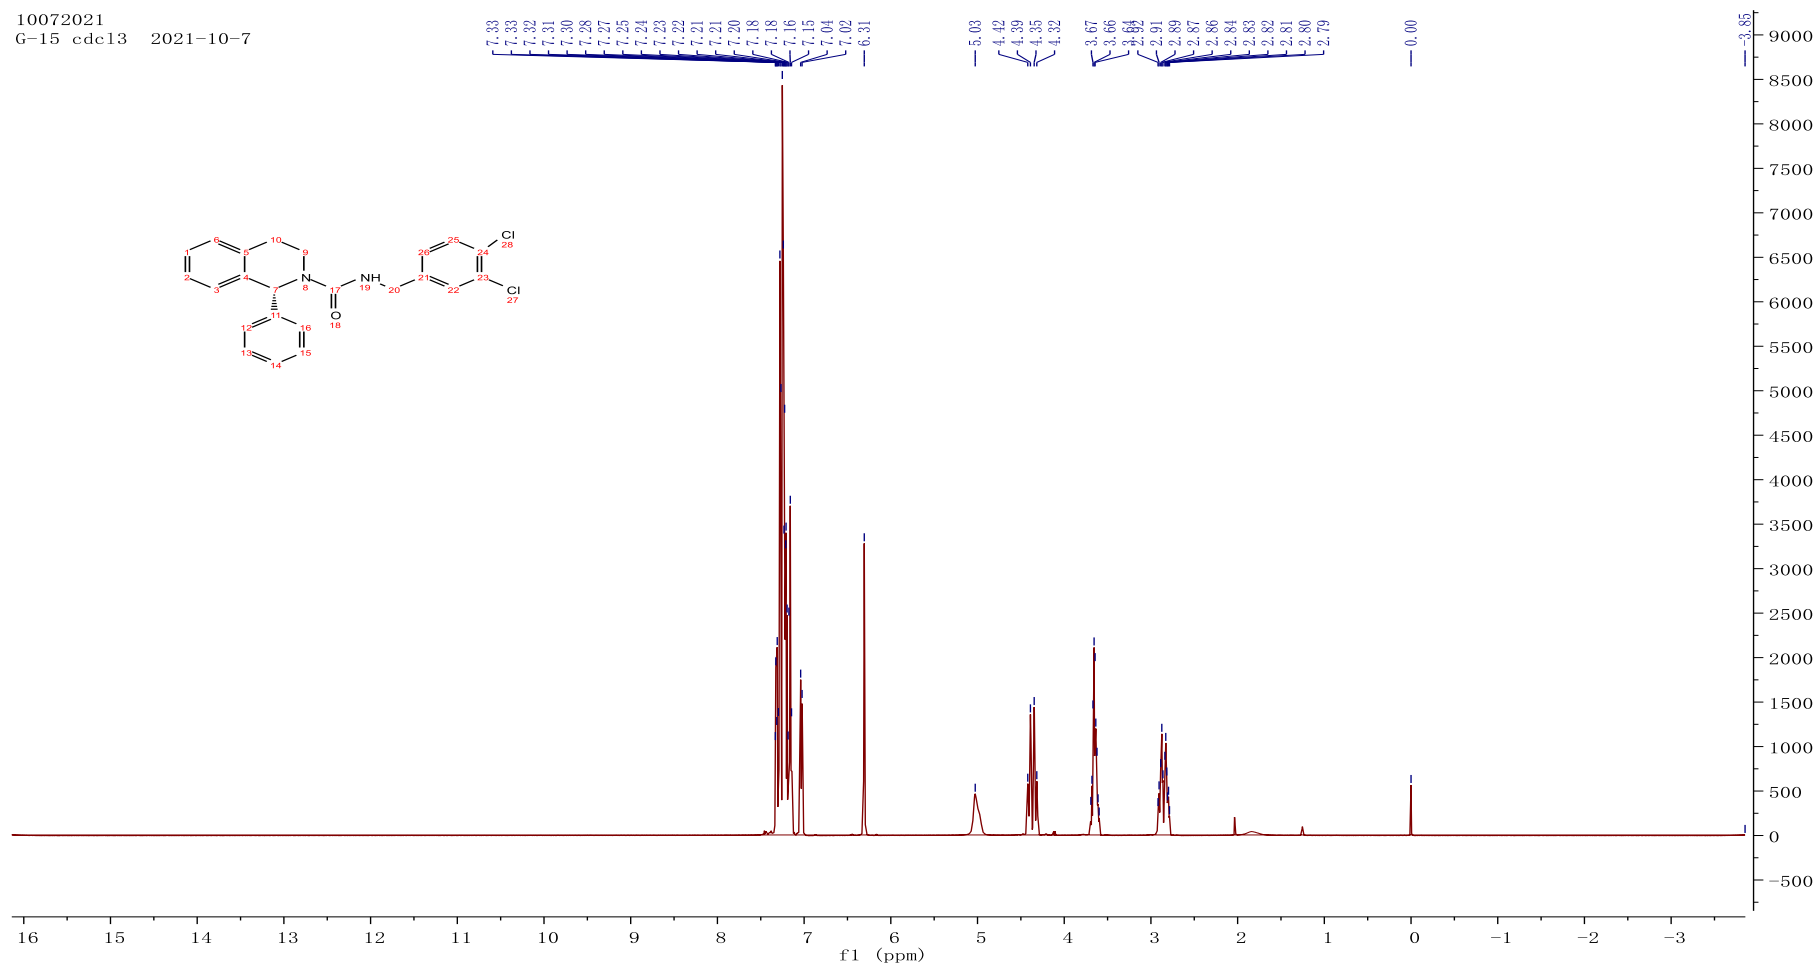

<sup>1</sup>H-NMR Spectral of **2z**

10072021  
G-15 cdc13 2021-10-7

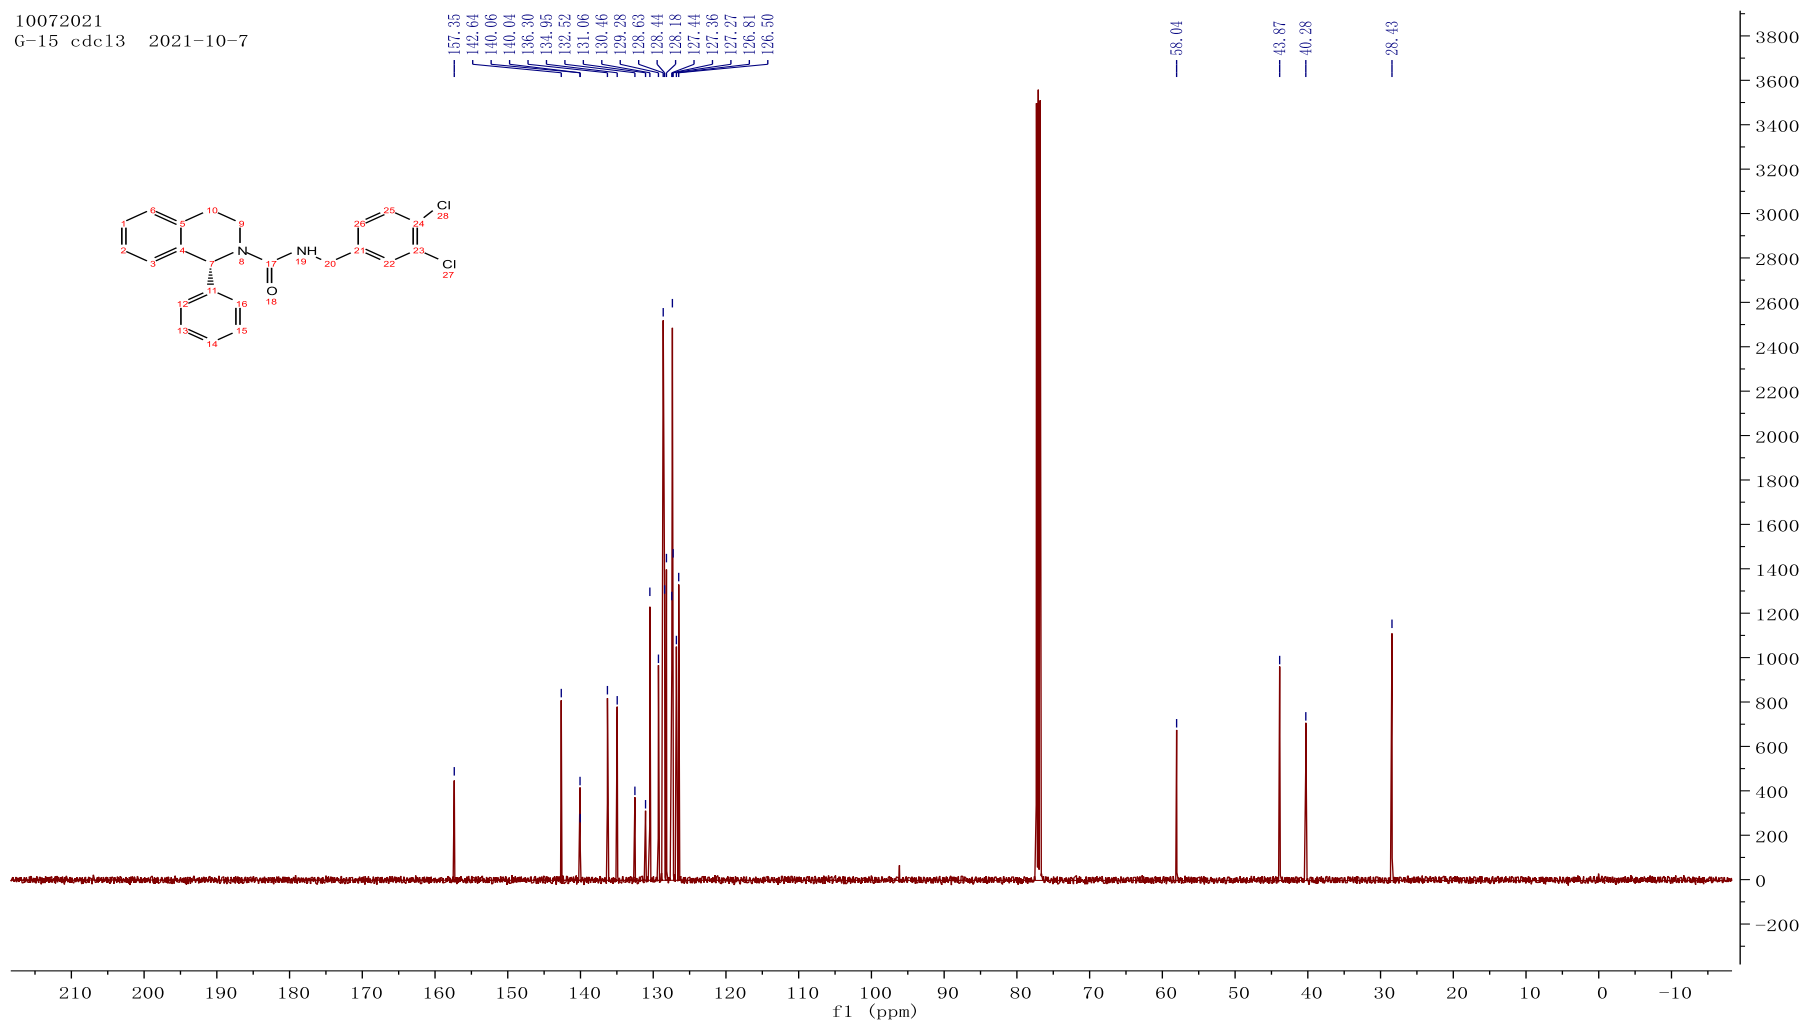

$^{13}\text{C}$ -NMR Spectral of **2z**

10072021  
G-16 cdc-113 2021-10-7

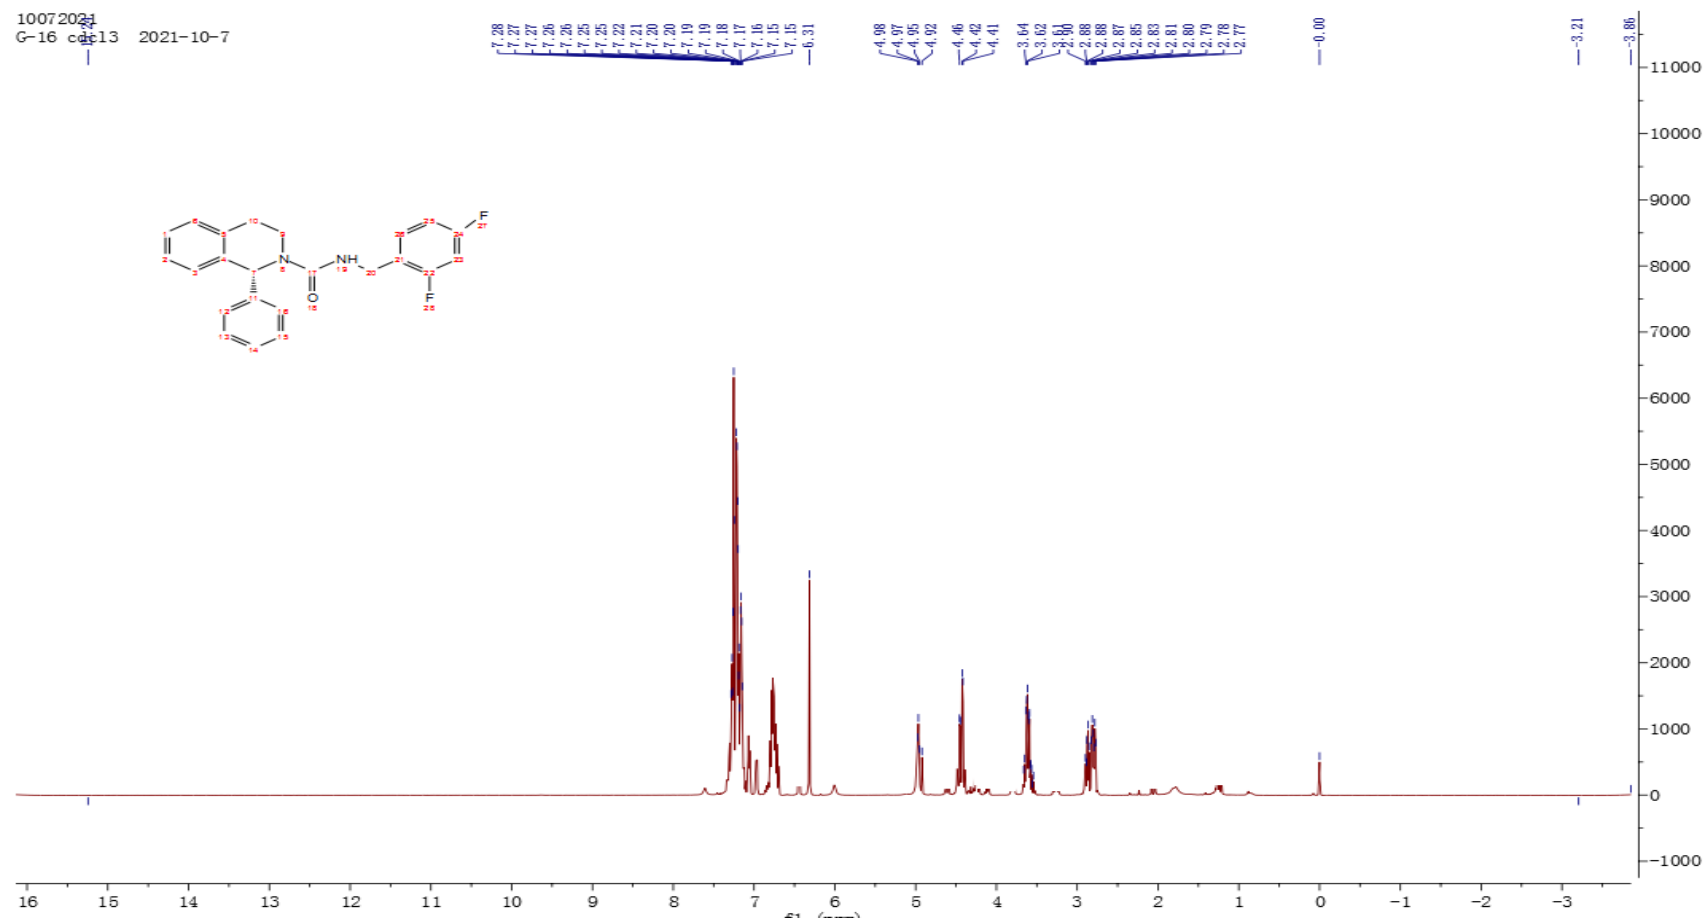

$^1\text{H}$ -NMR Spectral of **2aa**

10072021  
G-16 cdcl3 2021-10-7

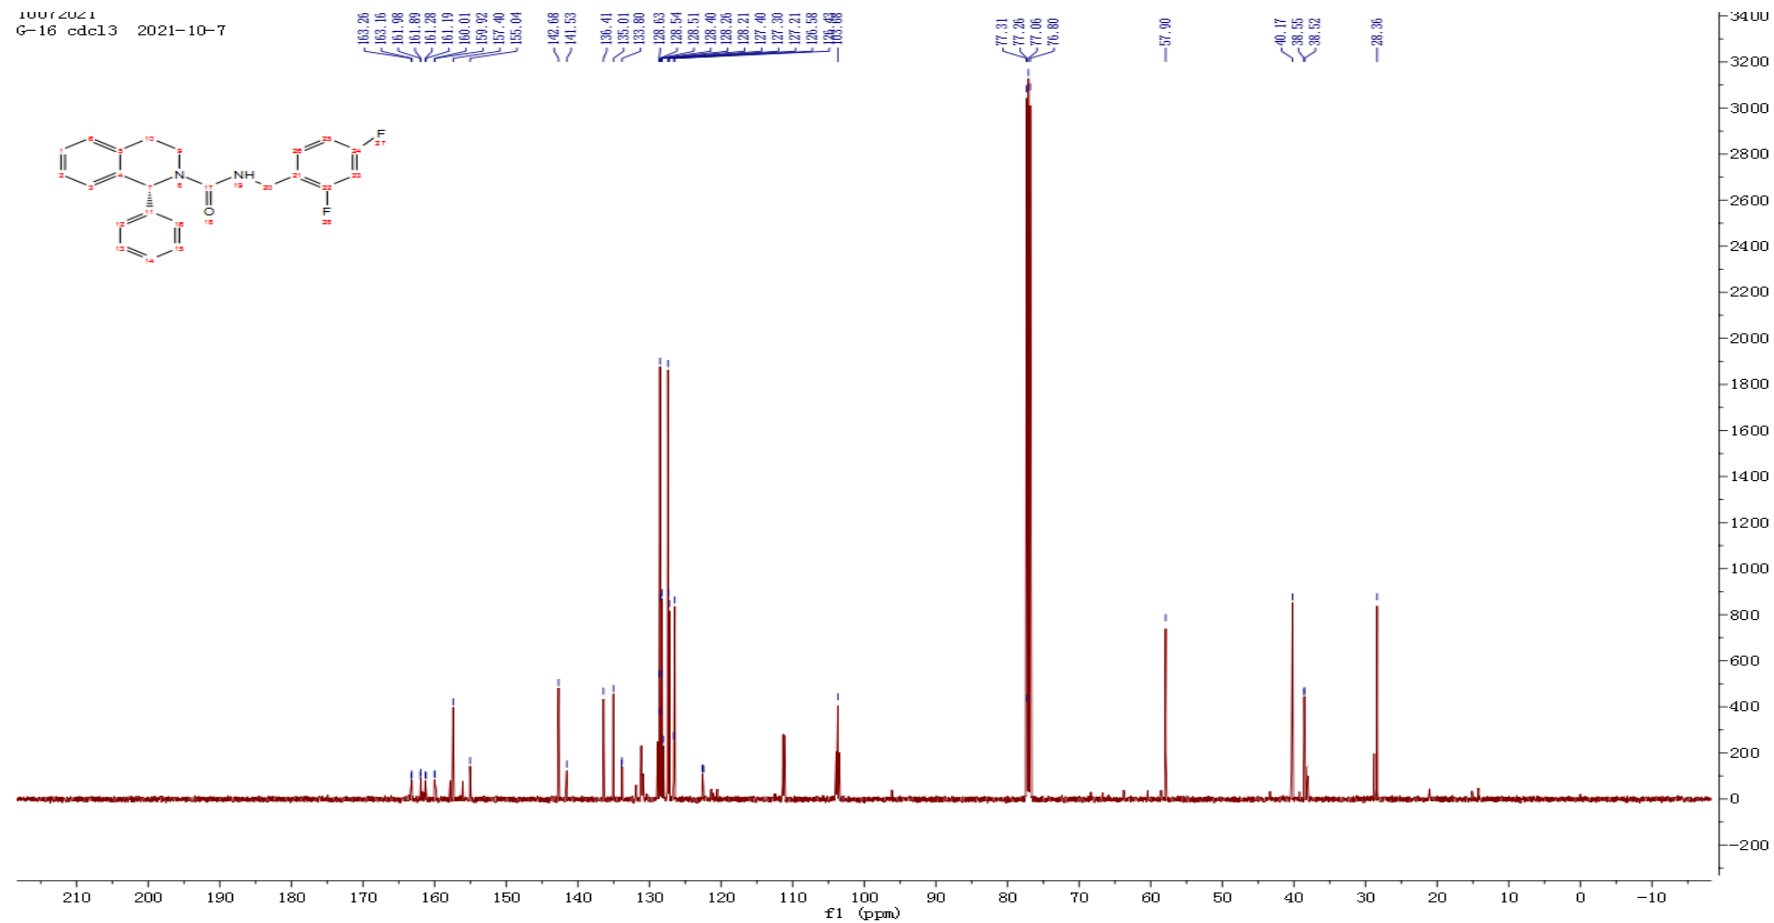

<sup>13</sup>C-NMR Spectral of 2aa

10072021  
G-17 cdc13 2021-10-7

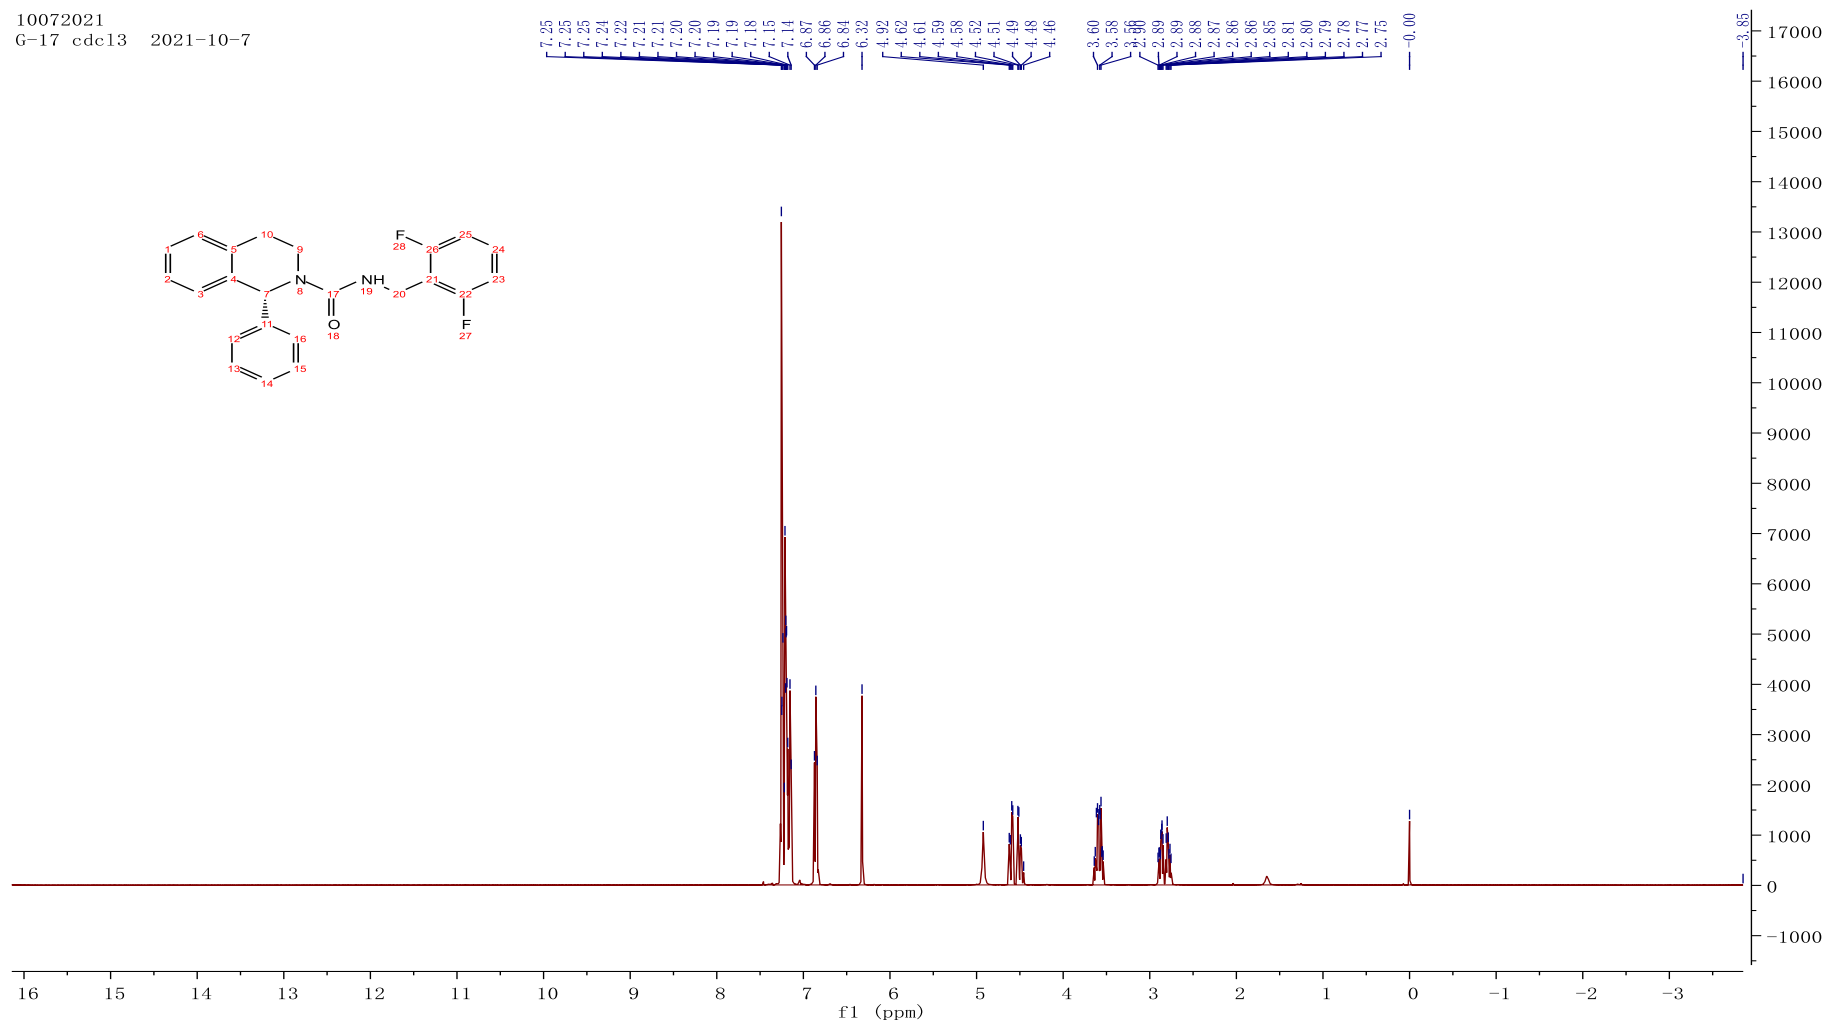

<sup>1</sup>H-NMR Spectral of **2ab**

10072021  
G-17 cdcl3 2021-10-7

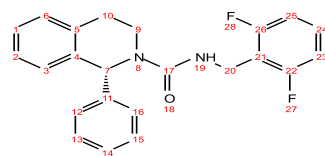

162.61 162.54 160.63 160.57 157.14  
142.68 136.49 135.08  
128.44 128.37 128.23 127.45 115.24 115.08 114.93 111.49 111.44 111.33 111.28  
77.29 77.24 77.04 76.78  
57.79  
40.08 33.13 28.32

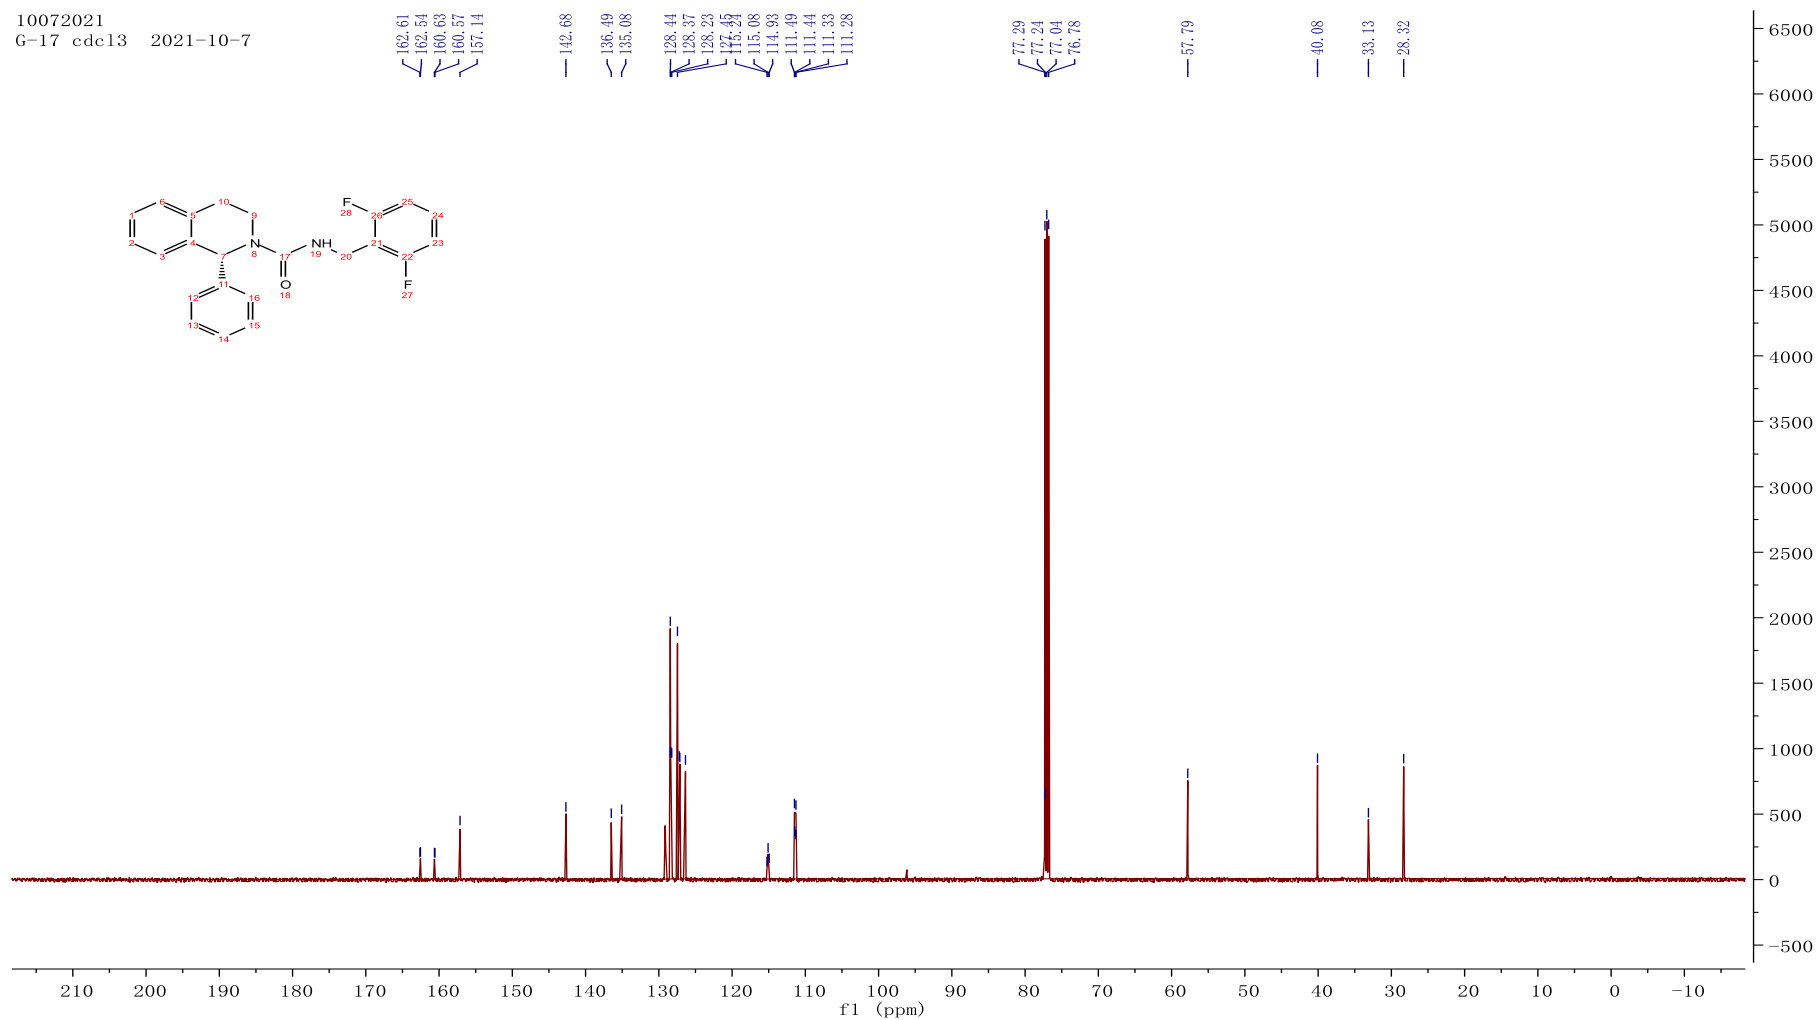

<sup>13</sup>C-NMR Spectral of **2ab**



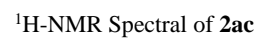

10072021  
G-18 cdc13 2021-10-7

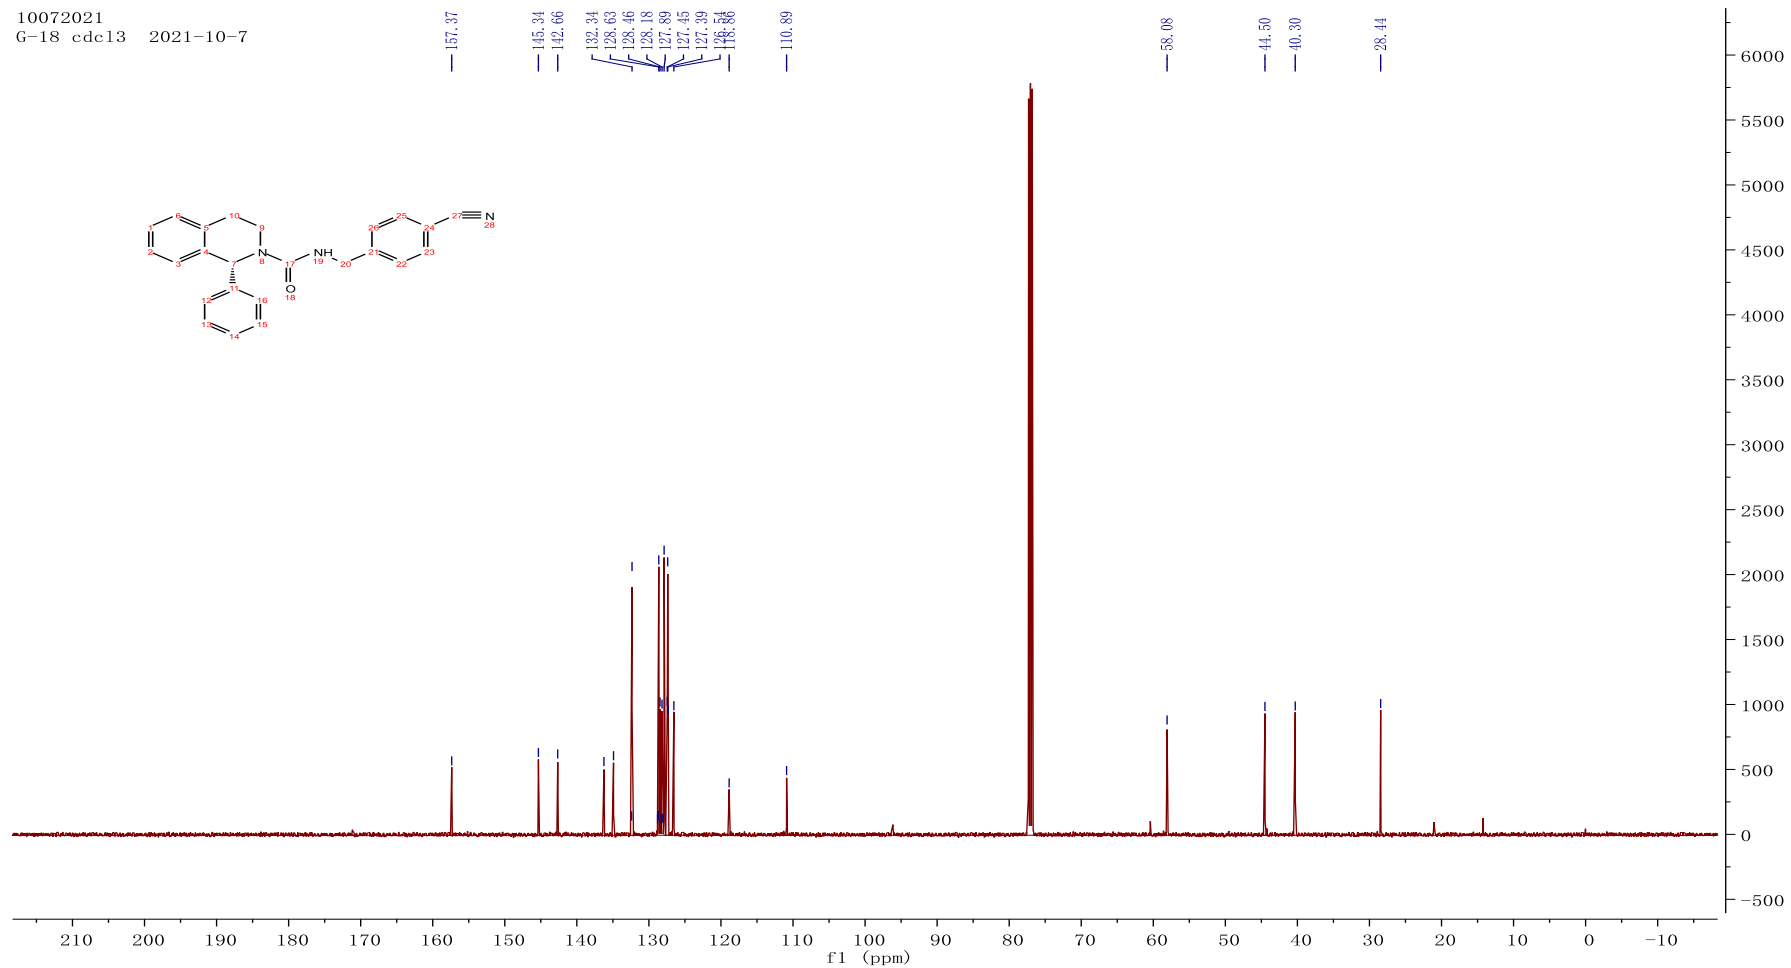

$^{13}\text{C}$ -NMR Spectral of **2ac**

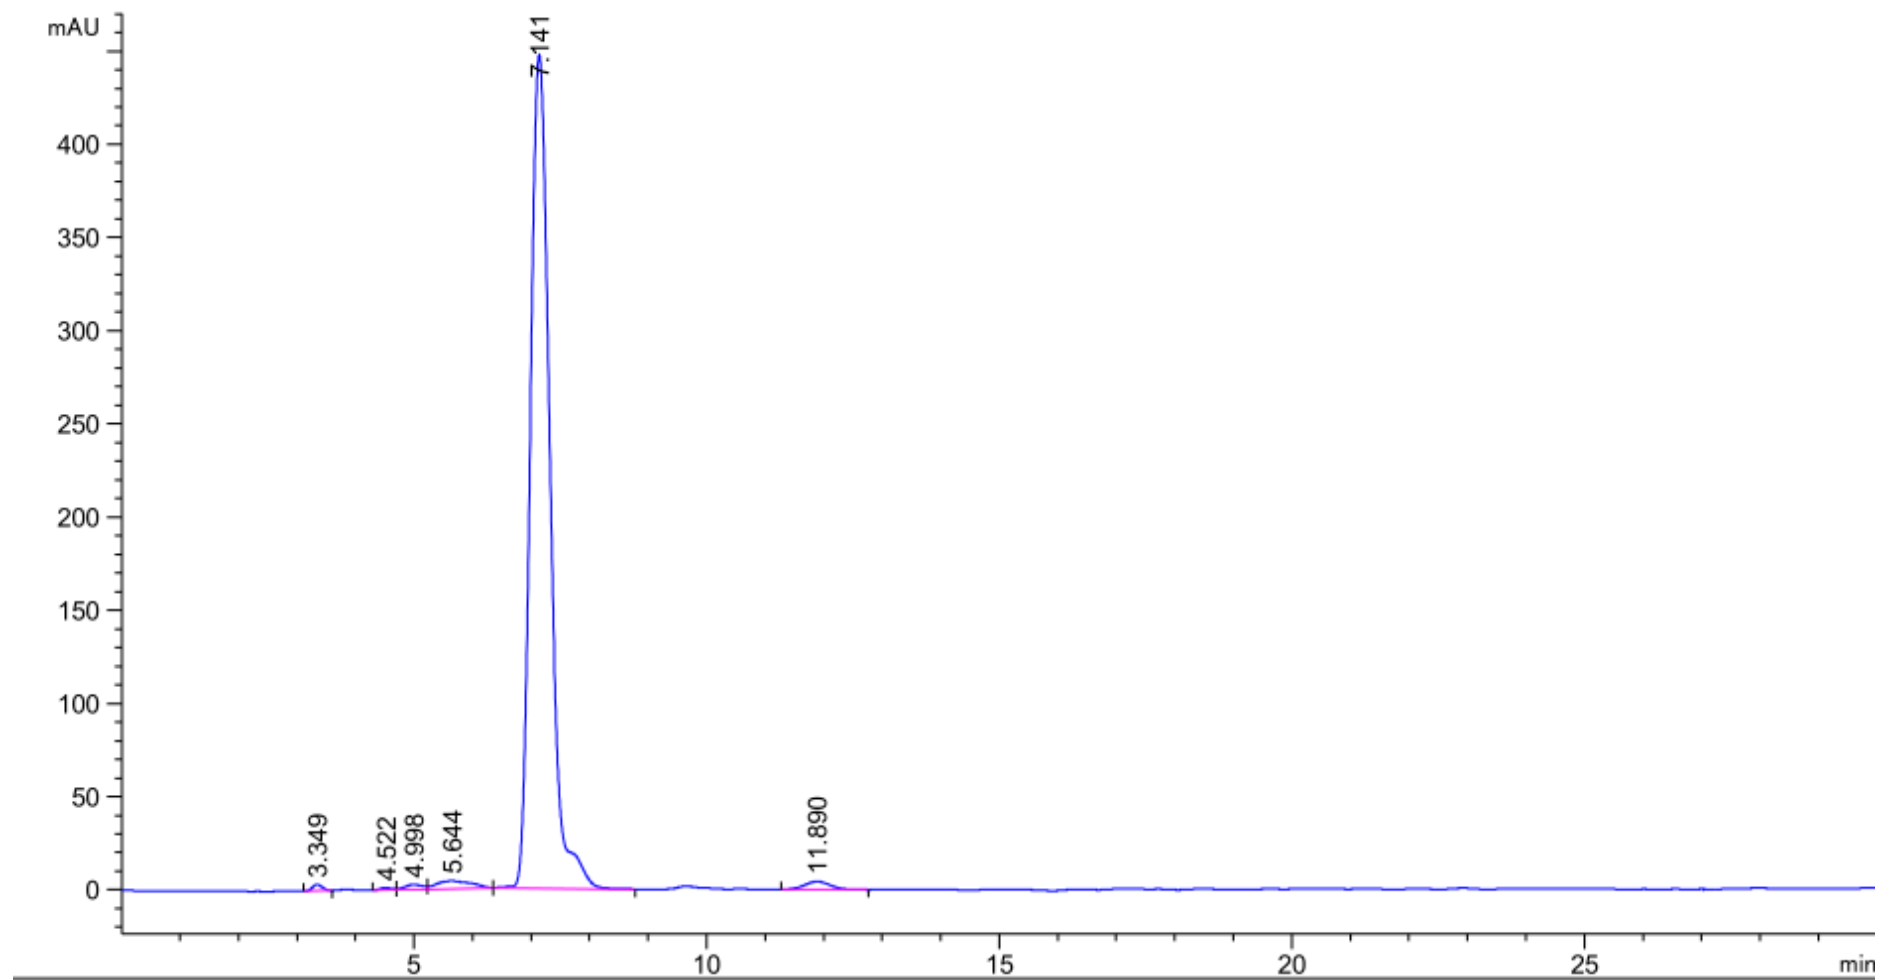

HPLC of compound 2d

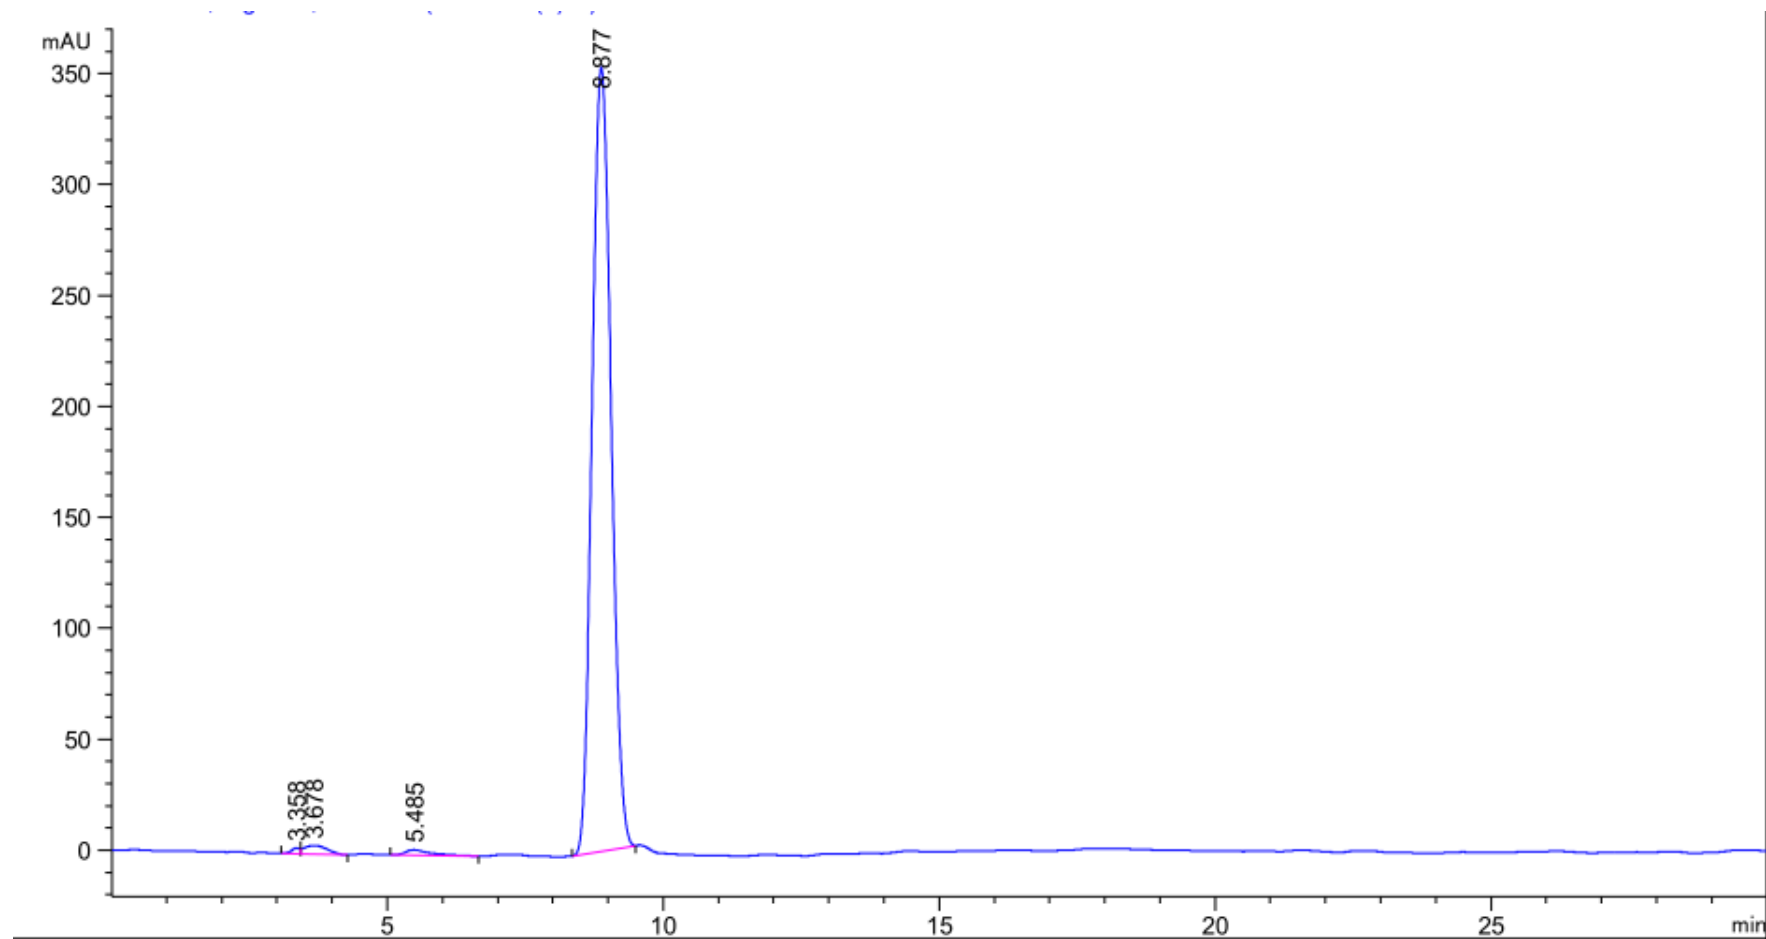

HPLC of compound 2i

DAD1 A, Sig=204,4 Ref=off (004-44-2j(2).D)

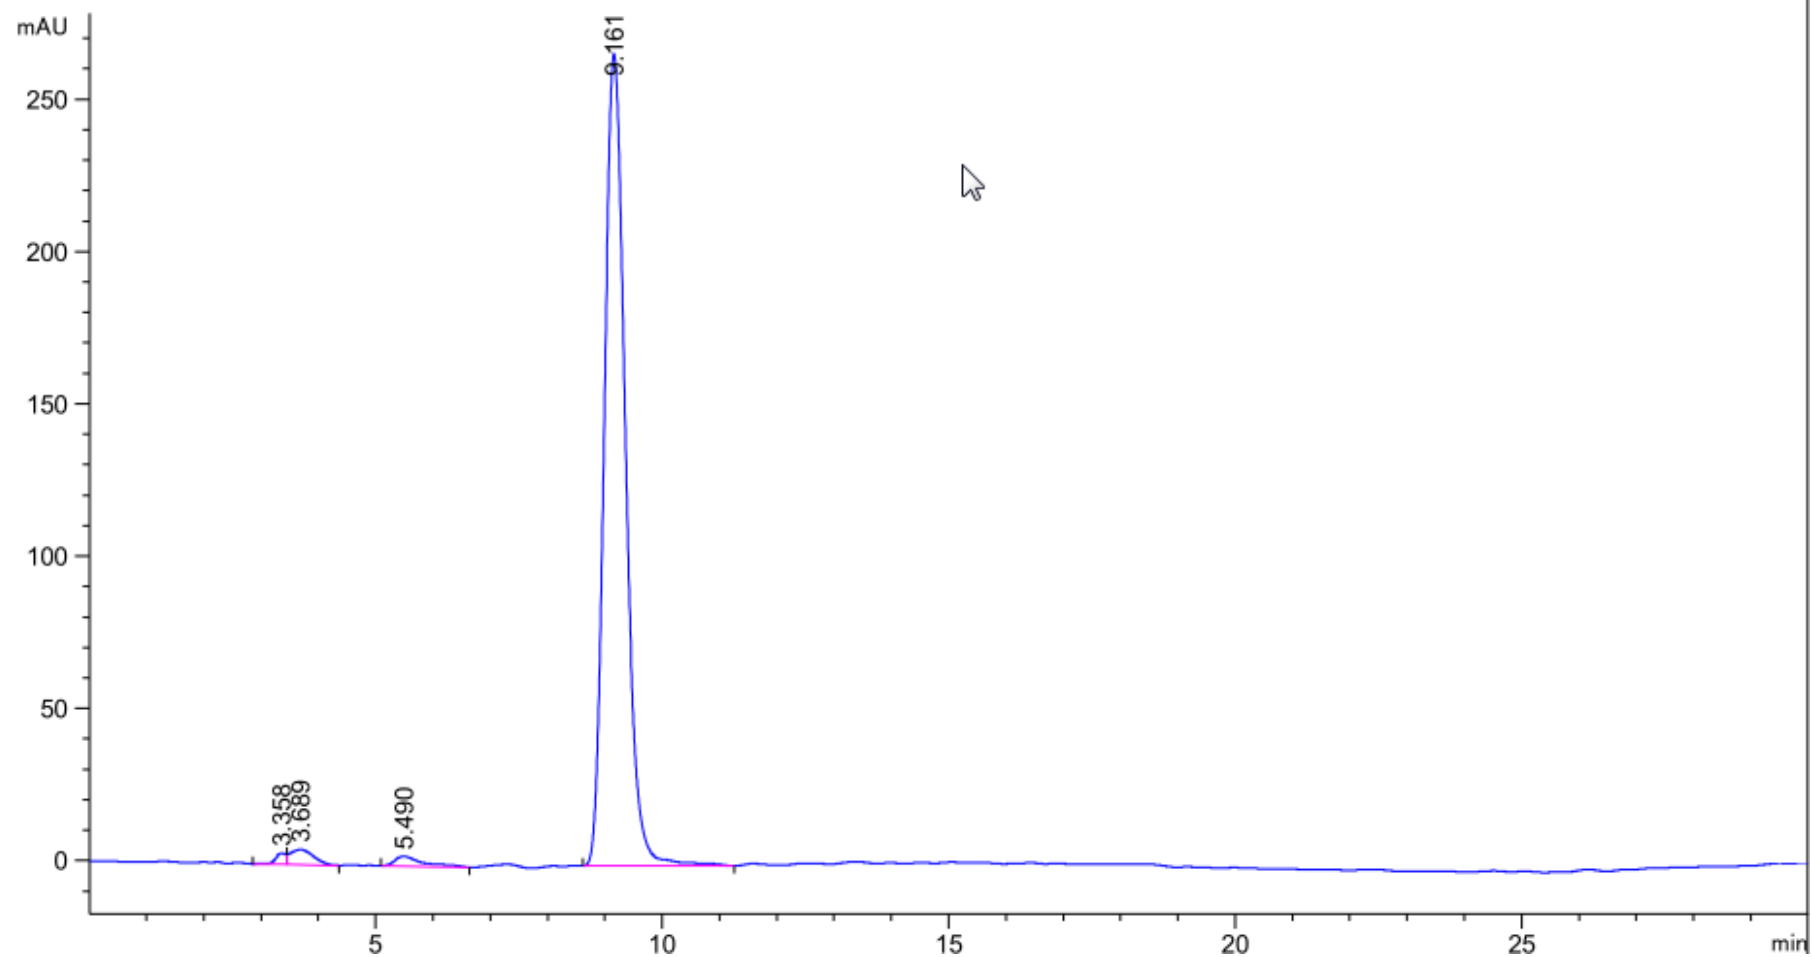

HPLC of compound 2j

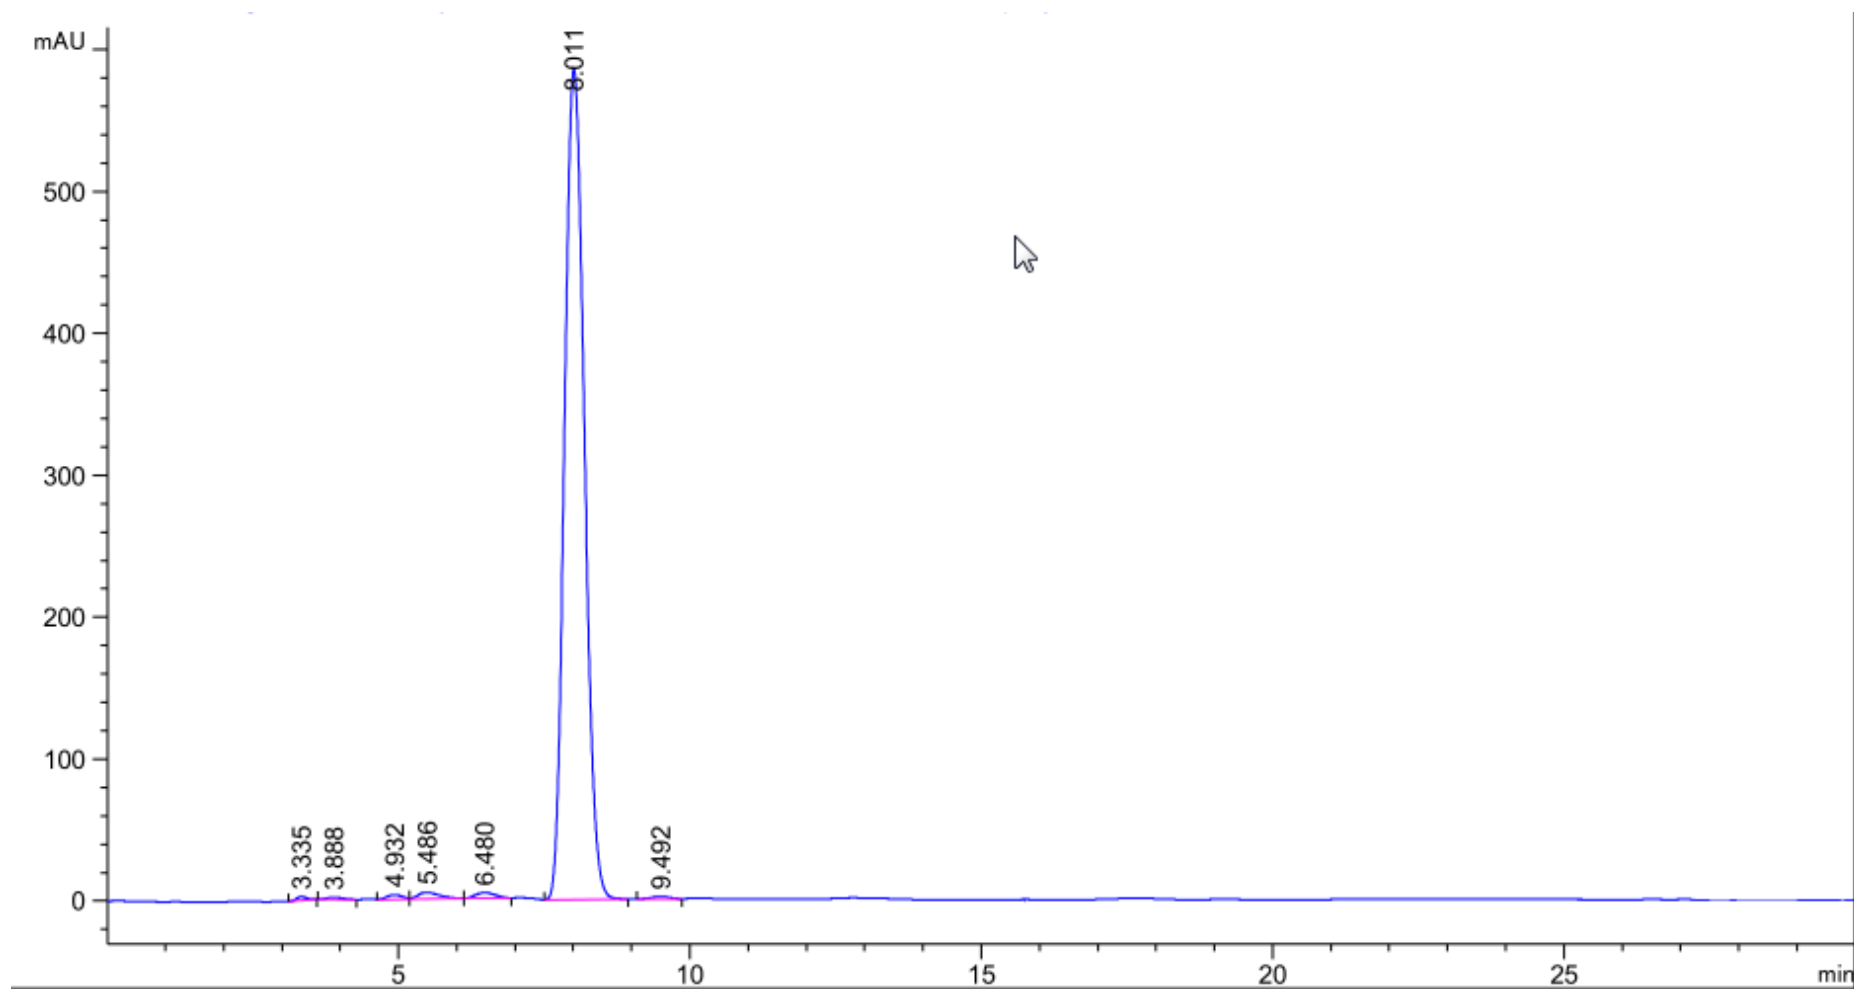

HPLC of compound 2p

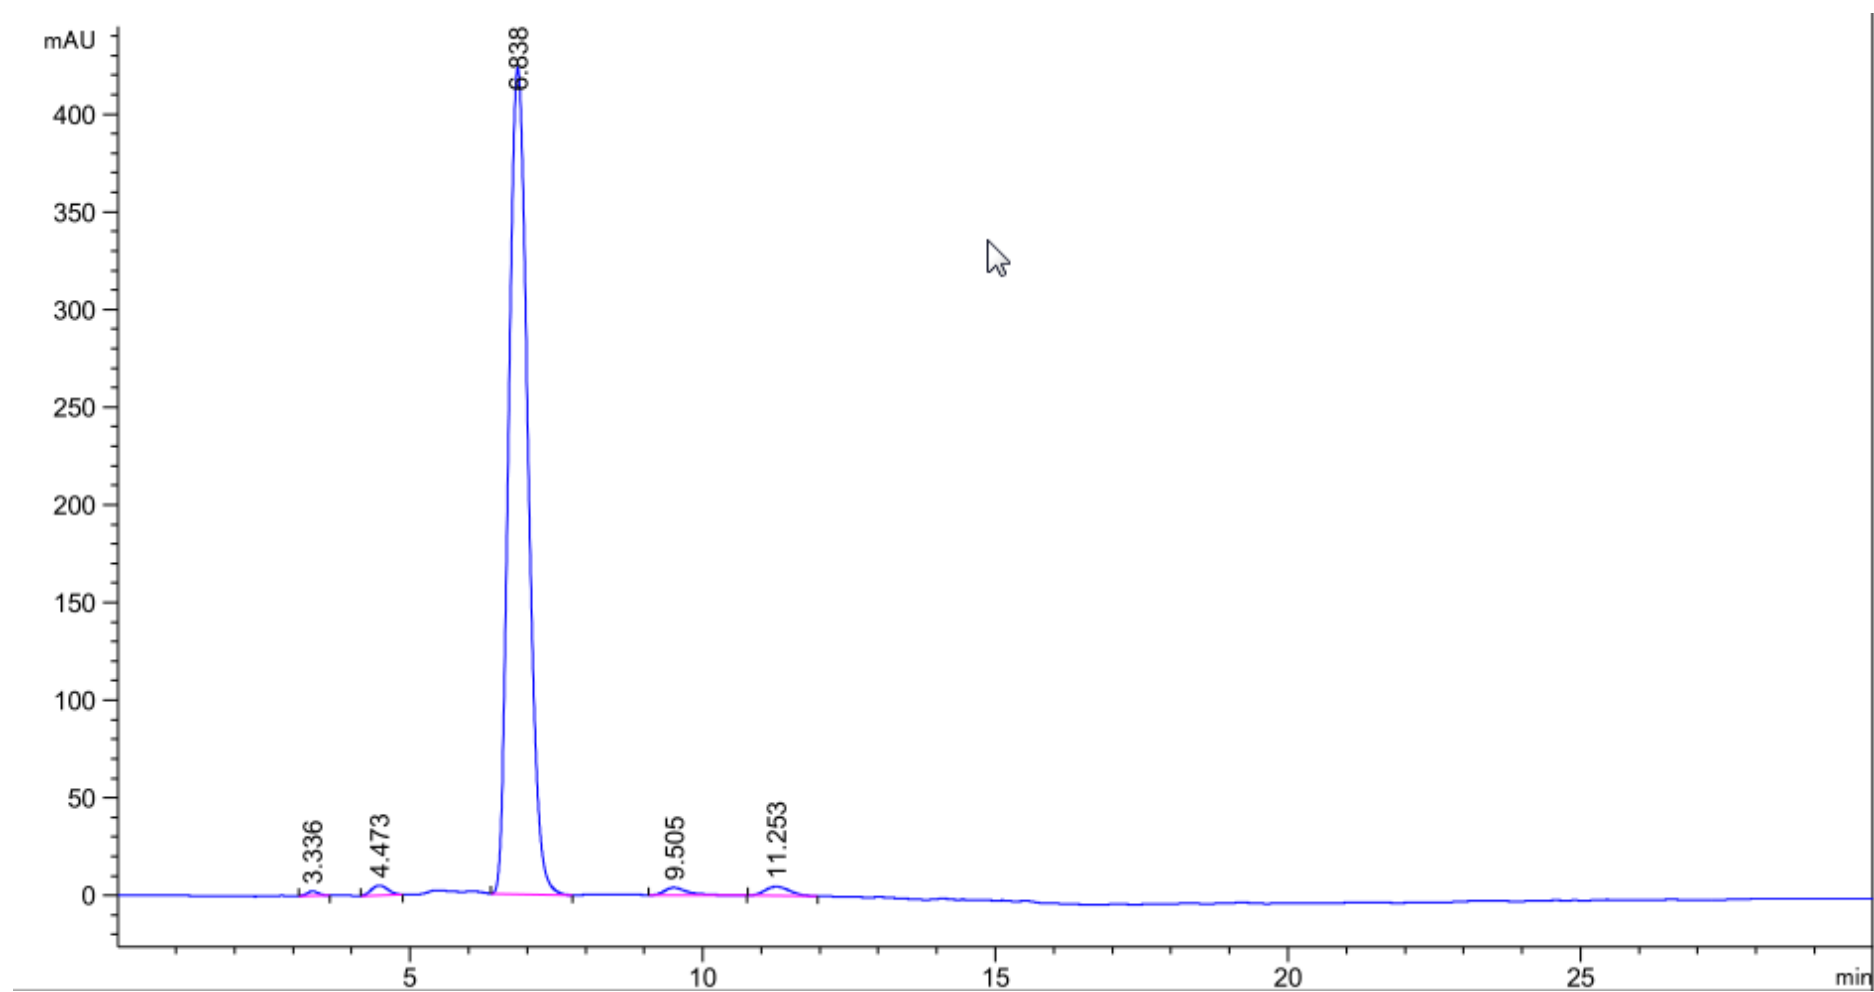

HPLC of compound 2t

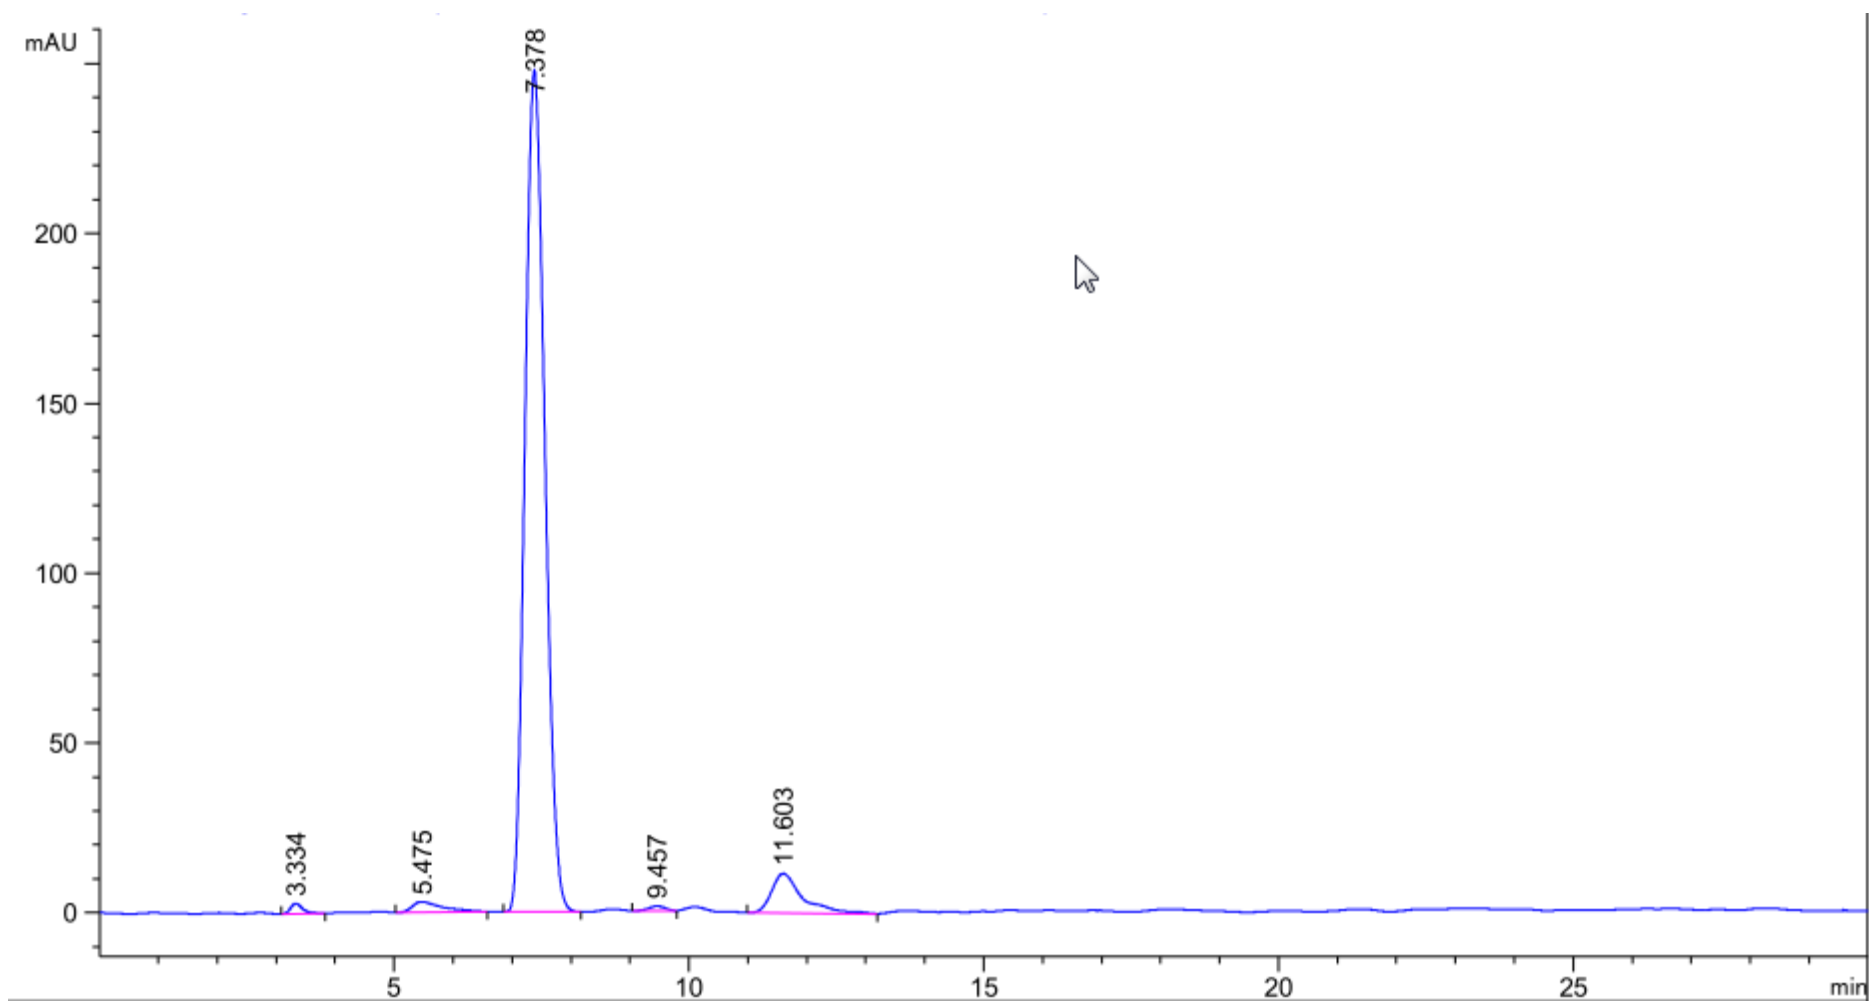

HPLC of compound 2v
